# Supplementary material for: Development and validation of a prehospital-stage prediction tool for traumatic brain injury: a multicentre retrospective cohort study in Korea
Source: PubMed Central journal article supplement — BMJ Open. 2022 Jan 12;12(1):e055918. doi: 10.1136/bmjopen-2021-055918 (PMC8756263; doi:10.1136/bmjopen-2021-055918), 2022-01-12
Supplement: bmjopen-2021-055918.draft_revisions.pdf [file bmjopen-2021-055918.draft_revisions.pdf]

# BMJ Open

BMJ Open is committed to open peer review. As part of this commitment we make the peer review history of every article we publish publicly available.

When an article is published we post the peer reviewers' comments and the authors' responses online. We also post the versions of the paper that were used during peer review. These are the versions that the peer review comments apply to.

The versions of the paper that follow are the versions that were submitted during the peer review process. They are not the versions of record or the final published versions. They should not be cited or distributed as the published version of this manuscript.

BMJ Open is an open access journal and the full, final, typeset and author-corrected version of record of the manuscript is available on our site with no access controls, subscription charges or pay-per-view fees (<http://bmjopen.bmj.com>).

If you have any questions on BMJ Open's open peer review process please email [info.bmjopen@bmj.com](mailto:info.bmjopen@bmj.com)

# BMJ Open

## Use of machine learning to develop a prehospital-stage prediction tool for traumatic brain injury

|                               |                                                                                                                                                                                                                                                                                                                                                                                                                                                                                                                                                                                                            |
|-------------------------------|------------------------------------------------------------------------------------------------------------------------------------------------------------------------------------------------------------------------------------------------------------------------------------------------------------------------------------------------------------------------------------------------------------------------------------------------------------------------------------------------------------------------------------------------------------------------------------------------------------|
| Journal:                      | <i>BMJ Open</i>                                                                                                                                                                                                                                                                                                                                                                                                                                                                                                                                                                                            |
| Manuscript ID                 | bmjopen-2021-055918                                                                                                                                                                                                                                                                                                                                                                                                                                                                                                                                                                                        |
| Article Type:                 | Original research                                                                                                                                                                                                                                                                                                                                                                                                                                                                                                                                                                                          |
| Date Submitted by the Author: | 02-Aug-2021                                                                                                                                                                                                                                                                                                                                                                                                                                                                                                                                                                                                |
| Complete List of Authors:     | Choi, Yeong Ho; Seoul National University Hospital, Emergency Department<br>Park, Jeong Ho; Seoul National University Hospital, Emergency Department<br>Hong, Ki Jeong; Seoul National University College of Medicine, Emergency Medicine; Seoul National University Seoul Metropolitan Government Boramae Medical Center, Emergency Medicine<br>Ro, Young Sun; Seoul National University Hospital, Emergency Department<br>Song, Kyoung Jun; Seoul Metropolitan Boramae Hospital, Department of Emergency Medicine<br>Shin, Sang Do; Seoul National University Hospital, Department of Emergency Medicine |
| Keywords:                     | ACCIDENT & EMERGENCY MEDICINE, Neurological injury < NEUROLOGY, Trauma management < ORTHOPAEDIC & TRAUMA SURGERY                                                                                                                                                                                                                                                                                                                                                                                                                                                                                           |
|                               |                                                                                                                                                                                                                                                                                                                                                                                                                                                                                                                                                                                                            |

SCHOLARONE™  
Manuscripts

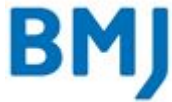

I, the Submitting Author has the right to grant and does grant on behalf of all authors of the Work (as defined in the below author licence), an exclusive licence and/or a non-exclusive licence for contributions from authors who are: i) UK Crown employees; ii) where BMJ has agreed a CC-BY licence shall apply, and/or iii) in accordance with the terms applicable for US Federal Government officers or employees acting as part of their official duties; on a worldwide, perpetual, irrevocable, royalty-free basis to BMJ Publishing Group Ltd ("BMJ") its licensees and where the relevant Journal is co-owned by BMJ to the co-owners of the Journal, to publish the Work in this journal and any other BMJ products and to exploit all rights, as set out in our [licence](#).

The Submitting Author accepts and understands that any supply made under these terms is made by BMJ to the Submitting Author unless you are acting as an employee on behalf of your employer or a postgraduate student of an affiliated institution which is paying any applicable article publishing charge ("APC") for Open Access articles. Where the Submitting Author wishes to make the Work available on an Open Access basis (and intends to pay the relevant APC), the terms of reuse of such Open Access shall be governed by a Creative Commons licence – details of these licences and which [Creative Commons](#) licence will apply to this Work are set out in our licence referred to above.

Other than as permitted in any relevant BMJ Author's Self Archiving Policies, I confirm this Work has not been accepted for publication elsewhere, is not being considered for publication elsewhere and does not duplicate material already published. I confirm all authors consent to publication of this Work and authorise the granting of this licence.

1  
2  
3  
4 1 **Title page**  
5  
6  
7 2  
8  
9 3 **1. Title**  
10  
11 4 Use of machine learning to develop a prehospital stage prediction tool for traumatic brain  
12  
13 5 injury  
14  
15  
16 6  
17  
18 7 **2. Authors**  
19  
20 8 Yeong Ho Choi, MD  
21  
22 9 Department of Emergency Medicine, Seoul National University College of Medicine and  
23  
24 10 Hospital, Seoul, Republic of Korea  
25  
26 11 Laboratory of Emergency Medical Services, Seoul National University Hospital  
27  
28 12 Biomedical Research Institute, Seoul, Korea  
29  
30 13 E-mail: d2uk87@gmail.com  
31  
32  
33  
34 14  
35  
36 15 Jeong Ho Park, MD  
37  
38 16 Department of Emergency Medicine, Seoul National University College of Medicine and  
39  
40 17 Hospital, Seoul, Republic of Korea  
41  
42 18 Laboratory of Emergency Medical Services, Seoul National University Hospital  
43  
44 19 Biomedical Research Institute, Seoul, Korea  
45  
46 20 E-mail: timthe@gmail.com  
47  
48  
49  
50 21  
51  
52 22 Ki Jeong Hong, MD, PhD  
53  
54 23 Department of Emergency Medicine, Seoul National University College of Medicine and  
55  
56 24 Hospital, Seoul, Republic of Korea  
57  
58 25 Laboratory of Emergency Medical Services, Seoul National University Hospital  
59  
60

1  
2  
3  
4 26 Biomedical Research Institute, Seoul, Korea

5  
6 27 E-mail: emkjhong@gmail.com

7  
8  
9 28

10  
11 29 Young Sun Ro, MD, DrPH

12  
13 30 Department of Emergency Medicine, Seoul National University College of Medicine and

14  
15 31 Hospital, Seoul, Republic of Korea

16  
17 32 Laboratory of Emergency Medical Services, Seoul National University Hospital

18  
19 33 Biomedical Research Institute, Seoul, Korea

20  
21 34 E-mail: ro.youngsun@gmail.com

22  
23 35

24  
25 36 Kyoung Jun Song, MD, PhD

26  
27 37 Department of Emergency Medicine, Seoul Metropolitan Government Seoul National

28  
29 38 University Boramae Medical Center, Seoul, Republic of Korea

30  
31 39 Laboratory of Emergency Medical Services, Seoul National University Hospital

32  
33 40 Biomedical Research Institute, Seoul, Korea

34  
35 41 E-mail: skciva@gmail.com

36  
37 42

38  
39 43 Sang Do Shin, MD, PhD

40  
41 44 Department of Emergency Medicine, Seoul National University College of Medicine and

42  
43 45 Hospital, Seoul, Republic of Korea

44  
45 46 Laboratory of Emergency Medical Services, Seoul National University Hospital

46  
47 47 Biomedical Research Institute, Seoul, Korea

48  
49 48 E-mail: shinsangdo@gmail.com

50  
51 49

52  
53 50 **3. Address correspondence and requests for reprints: Jeong Ho Park, MD**

1  
2  
3  
4 51 Address: Seoul National University Hospital, 101 Daehak-Ro, Jongno-Gu, Seoul 03080,

5  
6 52 Korea

7  
8  
9 53 Phone: +82-2-2072-1800

10  
11 54 FAX: +82-2-741-7855

12  
13 55 E-mail: timthe@gmail.com

14  
15 56

16  
17 57

18  
19 58

20  
21  
22  
23  
24  
25  
26  
27  
28  
29  
30  
31  
32  
33  
34  
35  
36  
37  
38  
39  
40  
41  
42  
43  
44  
45  
46  
47  
48  
49  
50  
51  
52  
53  
54  
55  
56  
57  
58  
59  
60

For peer review only

1  
2  
3  
4 59 **Abstract**

6 60 **Objectives:** Predicting diagnosis and prognosis of traumatic brain injury (TBI) at the  
7  
8  
9 61 prehospital stage is challenging; however, using comprehensive prehospital information and  
10  
11 62 machine learning may improve the performance of the predictive model. We developed and  
12  
13 63 tested predictive models for TBI that use machine learning algorithms using information that  
14  
15  
16 64 can be obtained in the prehospital stage.

17  
18 65 **Design:** This was a multi-center retrospective study.

19  
20 66 **Setting and participants:** This study was conducted at three tertiary academic emergency  
21  
22 67 departments (EDs) located in an urban area of South Korea. The data from adult patients with  
23  
24 68 severe trauma who were assessed by emergency medical service (EMS) providers and  
25  
26 69 transported to three participating hospitals between 2014 to 2018 were analyzed.

27  
28 70 **Results:** We developed and tested five machine learning algorithms—logistic regression  
29  
30 71 analyses, extreme gradient boosting, support vector machine, random forest, and elastic net  
31  
32 72 (EN)—to predict TBI, TBI with intracranial hemorrhage or injury (TBI-I), TBI with  
33  
34 73 emergency department or admission result of admission or transferred (TBI-ND), and TBI  
35  
36 74 with emergency department or admission result of death (TBI-D). Of the 1,169 patients in the  
37  
38 75 development cohort, TBI, TBI-I, TBI-ND, and TBI-D was 24.0%, 21.5%, 21.3%, and 3.7%,  
39  
40 76 respectively. The EN model yielded an AUROC of 0.799 for TBI, 0.844 for TBI-I, 0.811 for  
41  
42 77 TBI-ND, and 0.871 for TBI-D. The EN model also yielded the highest specificity, and  
43  
44 78 significant reclassification improvement. Variables related to loss of consciousness, Glasgow  
45  
46 79 Coma Scale, and light reflex were the three most important variables to predict all outcomes.

47  
48 80 **Conclusion:** Our results inform the diagnosis and prognosis of TBI. Machine learning  
49  
50 81 models resulted in significant performance improvement over that with logistic regression  
51  
52 82 analyses, and the best performing model was EN.

53  
54  
55  
56  
57  
58  
59  
60 83

1  
2  
3  
4 84 **Keywords:** brain injuries; traumatic; outcome; prognosis; machine learning.  
5  
6  
7  
8 85  
9  
10 86  
11  
12  
13  
14  
15  
16  
17  
18  
19  
20  
21  
22  
23  
24  
25  
26  
27  
28  
29  
30  
31  
32  
33  
34  
35  
36  
37  
38  
39  
40  
41  
42  
43  
44  
45  
46  
47  
48  
49  
50  
51  
52  
53  
54  
55  
56  
57  
58  
59  
60

For peer review only



1  
2  
3  
4 87 **Strengths and limitations of this study**  
5

- 6 88 ● By using high dimensional prehospital data, we developed and validated prediction  
7 89 models for the diagnosis and prognosis of traumatic brain injury using machine  
8 90 learning algorithms among patients with severe trauma, identified by emergency  
9 91 medical service providers.
- 12 92 ● Machine learning models showed acceptable-to-excellent discrimination performance  
13 93 (AUROCs were 0.799–0.871 according to outcomes in the best-performing model).  
14 94 When identifying 80% of target patients with traumatic brain injury, the false positive  
15 95 rate was almost 19.7–39.0%.
- 17 96 ● We used retrospective analysis of electronically collected prehospital data. We treated  
18 97 missing status as a separate category for our analysis, however, there could be different  
19 98 reasons for missing data.
- 22 99 ● External validation for other areas should be conducted to generalize the developed  
23 100 prediction model.  
24  
25 101

## 102 **Introduction**

103 Traumatic brain injury (TBI) is a significant health burden worldwide.<sup>1 2</sup> It is the leading  
104 cause of mortality and disability among young individuals.<sup>3</sup> Patients with TBI are vulnerable  
105 to hypoxia and hypotension in the early period of their course and these insults are associated  
106 with poor outcomes.<sup>4-6</sup> Prehospital assessment and management of patients with TBI is  
107 important,<sup>7 8</sup> as early prediction of TBI and correcting hypoxia and hypotension during the  
108 prehospital stage could be beneficial.<sup>9 10</sup> However, the identification of TBI can often be  
109 challenging in the prehospital area.<sup>7</sup> Vulnerable patients, including the elderly or patients who  
110 take medications like anti-platelet or anticoagulant drugs, often have TBI owing to low  
111 energy insults.<sup>11</sup> Prehospital clinical signs are also reported to have poor sensitivity for raised  
112 intracranial pressure following TBI.<sup>12</sup>

113 Several prediction models to target patients with TBI have been reported.<sup>13-15</sup>  
114 However, most incorporated information that is available only in the hospital, such as  
115 laboratory results or image findings.<sup>13 14 16</sup> In addition, most previous prediction models  
116 focused on the outcomes of patients with TBI, not the identification of TBI. Previously,  
117 predictors of older adult patients with TBI who required transport to a trauma center were  
118 identified. However, this was consensus-based; therefore, there is a lack of clinical data.<sup>17</sup>  
119 Accurate prehospital prediction of TBI and its severity could prevent delays to definite care  
120 for patients with TBI. Most emergency medical service (EMS) providers collect various  
121 information including demographics, past medical history, circumstances of the trauma, and  
122 clinical signs including vital signs; but those variables have not been evaluated together as  
123 predictors of TBI and its severity. Using a variety of prehospital information, and adapting  
124 newly emerging machine learning algorithms for predicting diagnosis, disposition, and  
125 outcome of TBI, might improve the accuracy of identification of TBI and its severity.<sup>18</sup>

1  
2  
3  
4 126           The aim of this study was to develop and test prediction models for the diagnosis and  
5  
6 127           prognosis of TBI using prehospital information and machine learning algorithms among  
7  
8 128           patients with severe trauma. We hypothesized that incorporating prehospital information  
9  
10 129           could achieve acceptable performance in predicting TBI, and machine learning algorithms  
11  
12 130           could contribute to performance improvement.

## 17 131   **Materials and Methods**

### 20 132   *Study design and settings*

23 133           This was a multi-center retrospective study conducted at three tertiary academic emergency  
24  
25 134           departments (EDs) located in an urban area (Seoul and Bundang) of South Korea. These EDs  
26  
27 135           received 50,000–90,000 visits annually. We adhered to the Transparent Reporting of a  
28  
29 136           Multivariable Prediction Model for Individual Prognosis or Diagnosis (TRIPOD) statement  
30  
31 137           on reporting predictive models.<sup>19</sup>

34 138           The EMS system in South Korea is operated by the National Fire Agency. The EMS  
35  
36 139           level is considered intermediate, as EMS providers can perform bleeding control, spinal  
37  
38 140           motion restriction, immobilization and splintage, advanced airway management, and  
39  
40 141           administer fluid intravenously. As only physicians can declare death in South Korea, EMS  
41  
42 142           providers cannot stop resuscitation and must transport all patients including those in cardiac  
43  
44 143           arrest to the ED. For all EMS transport, EMS providers record an ambulance run-sheet by  
45  
46 144           law. Since 2012, the National Fire Agency adapted the United States Centers for Disease  
47  
48 145           Control and Prevention of the United States field triage decision scheme to evaluate patients  
49  
50 146           with trauma,<sup>20</sup> and they developed an EMS severe trauma in-depth registry. For said patients,  
51  
52 147           EMS providers evaluate whether patients met trauma center transport criteria in the field  
53  
54 148           triage decision scheme. If they did, the in-depth registry should be recorded, and EMS  
55  
56  
57  
58  
59  
60

1  
2  
3  
4 149 transport protocol recommends that patients are transferred to a near regional trauma center;  
5  
6 150 but it is not mandatory.  
7  
8

9 151 The Ministry of Health and Welfare designated three ED levels according to the  
10  
11 152 resources and functional requirements; level 1 (n = 36) and level 2 (n = 118) EDs have more  
12  
13 153 resources and better facilities for emergency care and must be staffed by emergency  
14  
15 154 physicians 24 hours a day/365 days a year; whereas level 3 EDs (n = 248) can be staffed by  
16  
17 155 general physicians. In accordance with the EMS Act, all EDs participated annually in a  
18  
19 156 nationwide functional performance evaluation program, which was administered by the  
20  
21 157 Ministry of Health and Welfare. The three participating hospitals in this study were all level 1  
22  
23 158 EDs that can perform acute trauma care for patients with TBI 24 hours a day/365 days a  
24  
25 159 year—including emergency neurosurgical operation and angiographic interventions.  
26  
27  
28  
29

### 30 31 160 ***Data source***

32  
33  
34 161 We used an EMS ambulance run-sheet, EMS trauma in-depth registry, and ED administrative  
35  
36 162 database. The EMS database information, including ambulance run-sheet and trauma in-depth  
37  
38 163 registry, was collected electronically by EMS providers using tablets. The EMS record  
39  
40 164 review for each severe trauma has been performed by EMS medical directors of each fire  
41  
42 165 department since 2012. The ED administrative database contains patients' demographic  
43  
44 166 characteristics, route of visit, time of visit, and diagnosis and disposition. We merged the  
45  
46 167 EMS database with the ED administrative database based on patients' arrival time, age, and  
47  
48 168 sex.  
49  
50  
51

### 52 53 169 ***Study population***

54  
55  
56 170 We included adult (age  $\geq 15$ ) EMS users who were transported to participating hospitals with  
57  
58 171 severe trauma from January 1, 2014 to December 31, 2018. Severe trauma was assessed by  
59  
60

1  
2  
3  
4 172 EMS providers and defined as patients who fulfilled trauma center transport criteria  
5  
6 173 (physiologic criteria, anatomic criteria, mechanism of injury criteria, or special patients or  
7  
8 174 system consideration criteria) in the field triage decision scheme.<sup>21</sup> Patients were excluded if  
9  
10 175 they had out-of-hospital cardiac arrest or their main cause of EMS call was medical or  
11  
12 176 nontraumatic injury including choking, drowning, fire, flame, heat, cold, poisoning, chemical,  
13  
14 177 sexual assault, weather, or natural disaster. Patients with an unknown outcome were also  
15  
16 178 excluded.  
17  
18  
19  
20  
21

### 22 179 ***Outcome measure***

23  
24 180 The primary outcome measure was the diagnosis of TBI. TBI diagnosis was defined as  
25  
26 181 patients whose diagnostic code, according to the International Statistical Classification of  
27  
28 182 Diseases and Related Health Problems (ICD-10), was between S06.0 and S06.9.<sup>22 23</sup> The ED  
29  
30 183 administrative database has two types of primary diagnostic codes: the final diagnostic codes  
31  
32 184 at ED discharge and at hospital discharge. We extracted up to 20 codes for each. We defined  
33  
34 185 the diagnostic code as positive for TBI if a confirmative diagnostic code was found in any  
35  
36 186 level of the discharge record. A secondary outcome measure was the diagnosis of TBI with  
37  
38 187 intracranial hemorrhage or injury (TBI-I), defined as ED discharge or hospital discharge  
39  
40 188 diagnosis ICD-10 code S06.1–S06.9. Concussion (ICD-10 code with S06.0) was excluded in  
41  
42 189 TBI-I. A tertiary outcome was TBI with non-discharge (TBI-ND). Non-discharge was  
43  
44 190 defined as patients whose ED discharge disposition included admission, transfer, or death.  
45  
46 191 Quaternary outcome measure was TBI with death (TBI-D). Death was defined as patients  
47  
48 192 whose ED discharge disposition or hospital discharge disposition was death.  
49  
50  
51  
52  
53  
54  
55

### 56 193 ***Variables and preprocessing***

57  
58 194 We collected patients' demographic data, circumstances of trauma, chief complaints, EMS  
59  
60

1  
2  
3  
4 195 vital sign assessment, EMS management and hospital outcomes. The detailed descriptions of  
5  
6 196 each variable are described in Supplementary Table 1. Categorical variables were  
7  
8  
9 197 preprocessed with the one-hot encoding (dummy variable encoding) method. Continuous  
10  
11 198 variables were divided into four quantiles and unknown or missing values were categorized  
12  
13 199 as a fifth category. One-hot encoding was also applied to discretized continuous variables.  
14  
15 200 Preprocessing measures including discretization results of continuous variables are presented  
16  
17  
18 201 in Supplementary Table 1.

## 22 202 ***Model development***

23  
24 203 We developed prediction models for outcomes by using five machine learning algorithms:  
25  
26 204 logistic regression analyses (LR), extreme gradient boost (XGB), random forest (RF), support  
27  
28 205 vector machine (SVM), and elastic net (EN). The LR algorithm was chosen as baseline  
29  
30 206 comparison algorithm because it is widely used in the medical field and has been used for  
31  
32 207 previous prediction model development in TBI studies.<sup>14 24</sup> Backward stepwise LR was  
33  
34 208 selected for feature selection. The other four algorithms were selected based on their ability  
35  
36 209 to model nonlinear associations, their relative ease of implementation, and their general  
37  
38 210 acceptance in the machine learning community.<sup>25-29</sup> All algorithms have a method to  
39  
40 211 calculate the probability of the outcome occurring and algorithms other than LR need  
41  
42 212 hyperparameter tuning for proper training and prediction.

43  
44 213 The study population was split into training cohorts that included development,  
45  
46 214 validation, and test cohorts. The development cohort included a training cohort from which  
47  
48 215 each of the machine learning prediction models were derived and a validation cohort in which  
49  
50 216 the prediction models were applied to adjust the hyperparameters of the algorithm. The test  
51  
52 217 cohort was used for the final evaluation of the performance of the prediction models.  
53  
54 218 Chronological split was used for data split. Patients enrolled from January 1, 2014 to  
55  
56  
57  
58  
59  
60

1  
2  
3  
4 219 December 31, 2016 were used as the training cohort; patients from January 1, 2017 to  
5  
6 220 December 31, 2017 were used as the validation cohort; and patients from January 1, 2018 to  
7  
8 221 December 31, 2018 were used as the test cohort. Hyperparameter tuning using validation data  
9  
10 222 was conducted by, first, a random search within 10,000 randomly generated hyperparameters;  
11  
12 223 then, grid search hyperparameters chosen around from random search with five candidates  
13  
14 224 per each hyperparameter. Finally, hyperparameter with best area under receiver-operation  
15  
16 225 curve (AUROC) in validation cohorts were selected. Test data were separated during training  
17  
18 226 and tuning processes and used to measure algorithm performance.  
19  
20  
21  
22  
23

#### 24 227 ***Statistical analysis***

26 228 The demographic findings and outcomes of the study population were described in this study.  
27  
28 229 Additionally, the baseline characteristics of the training cohort and the validation cohort were  
29  
30 230 compared. The continuous variables were compared by using Student's T-test or the  
31  
32 231 Wilcoxon rank sum test, and the categorical variables were compared by using the chi-  
33  
34 232 squared test or the Fisher exact test, as appropriate.  
35  
36

37 233 We assessed discrimination performance by comparing the AUROC for each model  
38  
39 234 in the test cohort. We considered an AUROC of 0.5 as no discrimination, 0.7 to 0.8 as  
40  
41 235 acceptable, 0.8 to 0.9 as excellent, and more than 0.9 is considered outstanding.<sup>30</sup> Area under  
42  
43 236 the precision-recall curve (AUPRC) was assessed for each model in the test cohort. We  
44  
45 237 assessed the calibration power by using the Hosmer–Lemeshow test, the scaled Brier score,  
46  
47 238 and a calibration plot in the test cohort.<sup>31</sup> For the delineation of test characteristics, the  
48  
49 239 sensitivity, specificity, and positive and negative predictive values with 95% CIs were  
50  
51 240 determined using a cutoff probability at a sensitivity of 80%. Given that poor sensitivity of  
52  
53 241 clinical predictors for TBI in previous studies,<sup>12 32</sup> and almost 75% sensitivity level for other  
54  
55 242 severe disease prediction in prehospital settings,<sup>33 34</sup> we thought that 80% sensitivity was an  
56  
57  
58  
59  
60

1  
2  
3  
4 243 appropriate target for our prediction model. We calculated false positive rate as 1 –  
5  
6 244 specificity. The added prognostic power of each prediction model compared to the LR model  
7  
8  
9 245 was also evaluated by continuous net reclassification index (NRI). NRI is a statistical method  
10  
11 246 to quantify how well a new model correctly reclassifies the study population with the other  
12  
13 247 models. Details of NRI are described elsewhere.<sup>35</sup>

14  
15 248 By using a model-specific metric, the variable importance of each model was  
16  
17  
18 249 assessed, except for the SVM algorithm. The variable importance was determined by the  
19  
20 250 coefficient effect sizes for the LR model. The XGB and RF models were ranked by variable  
21  
22 251 importance on the selection frequency of the variable as a decision node. The absolute value  
23  
24 252 of the coefficients corresponding to the tuned model were used for the measurement of  
25  
26 253 variable importance in the EN algorithm.<sup>36</sup> To compare the variable importance of each  
27  
28  
29 254 prediction models efficiently, top 5 variables of each model was presented.

30  
31 255 All statistical analyses were performed with R Statistical Software (version 4.0.1; R  
32  
33 256 Foundation for Statistical Computing, Vienna, Austria). Packages included caret, e1071,  
34  
35 257 xgboost, randomForest, and glmnet for the analysis of the machine learning algorithms.  
36  
37  
38  
39

#### 40 258 ***No patient and public involvement***

41  
42 259 This research was done without patient involvement. Patients were not invited to comment on  
43  
44 260 the study design and were not consulted to develop patient relevant outcomes or interpret the  
45  
46 261 results. Patients were not invited to contribute to the writing or editing of this document for  
47  
48  
49 262 readability or accuracy.  
50

51 263  
52  
53  
54  
55  
56  
57  
58  
59  
60



## 264 **Result**

### 265 *Demographic findings*

266 Among the 157,134 EMS users transported to three hospitals from 2014 to 2018, 1,169  
267 patients were included in the final analysis (Figure 1). Patients were split into 2 datasets: data  
268 from 2014 to 2017, consisting of 867 patients (74.2%) in the development cohort; and the  
269 remaining data from 2018 consisting of 302 patients (25.8%) in the test cohort (Figure 1).  
270 Among the development cohort, data from 2014 to 2016—consisting of 661 patients—were  
271 used as the training cohort, and 2017 data—consisting of 206 patients—were used as the  
272 validation cohort in the model.

273 Table 1 shows key demographic findings of the development and test cohorts. Median  
274 (IQR) age was 52 years (35–66) in the development cohort and 56 years (40–69) in the test  
275 cohort. Traffic accident was most common mechanism of trauma (43.3% for the development  
276 cohort and 41.4% for the test cohort). The proportion of patients with alert mental status was  
277 58.1% for the development cohort and 69.5% in the test cohort. Overall, TBI, TBI-I, TBI-  
278 ND, TBI-D occurred in 215 (24.8%), 195 (22.5%), 192 (22.1%), and 32 (3.7%) in the  
279 development cohort; and 66 (21.9%), 56 (18.5%), 57 (18.9%), and 11 (3.6%) in the test  
280 cohort. All demographic characteristics of the development and test cohorts are described in  
281 Supplementary Table 2.

### 282 *Main analysis*

283 The discrimination and NRI of the prediction models on the test cohort are presented in Table  
284 2. The AUROC for outcomes were 0.770–0.806 for TBI, 0.820–0.844 for TBI-I, 0.767–0.811  
285 for TBI-ND, and 0.664–0.889 for TBI-D (Table 2 and Supplementary Figure 1). Compared to  
286 LR, XGB performed significantly well in predicting TBI, and RF and EN performed well in

1  
2  
3  
4 287 predicting TBI-ND and TBI-D. EN model generally performed well on all outcomes. The  
5  
6 288 AUROC of the EN model for outcomes were 0.799 (95% CI: 0.732–0.867), 0.844 (95% CI:  
7  
8 289 0.779–0.910), 0.811 (95% CI: 0.741–0.882), and 0.871 (95% CI: 0.764–0.978) for TBI, TBI-  
9  
10 290 I, TBI-ND, and TBI-D, respectively. Machine learning models generally resulted in  
11  
12 291 significant reclassification improvement compared to LR for TBI, TBI-I, and TBI-ND. For  
13  
14 292 prediction TBI-D, AUROC difference, and reclassification improvement compared to LR  
15  
16 293 was non-significant in all machine learning models. The precision-recall curve is shown in  
17  
18 294 Supplementary Figure 2. AUPRC were 0.479–0.564 for TBI, 0.469–0.606 for TBI-I, 0.477–  
19  
20 295 0.551 for TBI-ND and 0.094–0.140 for TBI-D. EN model showed highest AUPRC among all  
21  
22 296 prediction models. Supplementary Figure 3 shows the calibration plot of prediction models  
23  
24 297 according to outcomes. All prediction models generally showed poor calibration. Given the  
25  
26 298 high AUROC and AUPRC among prediction models, and reclassification improvement  
27  
28 299 compared to LR, we determined EN as a best-performing prediction model in our analysis.

30  
31  
32 300 Using cutoff of 80% sensitivity, specificity was 47.5–68.2% for TBI, 71.1–81.3% for  
33  
34 301 TBI-I, 46.1–74.3% for TBI-ND, and 42.6–0 for TBI-D. EN showed the highest specificity  
35  
36 302 and PPV among all outcomes. False positive rate (1 – specificity) was almost 19.7–39.0%  
37  
38 303 according to outcomes in the EN model. The 95% CI of specificity of the EN model was not  
39  
40 304 overlapped with LR in TBI, TBI-ND, and TBI-D predictions. NPV was almost 89–99% for  
41  
42 305 all outcomes in the prediction models (Table 3).

43  
44 306 Table 4 shows the top 5 variable importance of prediction models according to  
45  
46 307 outcomes. Variables related to patients' symptom of loss of consciousness, Glasgow Coma  
47  
48 308 Scale component, and light reflex were the three most important variables to predict all  
49  
50 309 outcomes. Compared to other outcomes, the difference between variable importance for TBI-  
51  
52 310 D was prominent, and the mechanism of injury, heart rate, and age showed the highest  
53  
54 311 importance for predicting TBI-D.

## 312 Discussion

313 By using prehospital data from EMS users visiting three teaching hospitals, we developed  
314 and validated prediction models for the diagnosis and prognosis of TBI using machine  
315 learning algorithms among patients with severe trauma, identified by EMS providers in South  
316 Korea. We found that 24% of patients were diagnosed with TBI, 22% showed intracranial  
317 injury, 21% could not be discharged from the ED with a TBI diagnosis, and 4% showed TBI-  
318 related death. Machine learning models showed acceptable-to-excellent discrimination  
319 performance (AUROCs were 0.799–0.871 according to outcomes in the best-performing EN  
320 model). When identifying 80% of target patients with TBI, the false positive rate was almost  
321 19.7–39.0%. Consciousness status related variables ranging from patients' symptom to EMS  
322 providers' assessment showed the highest importance for predicting all outcomes. This study  
323 adds considerably to the understanding of prehospital prediction performance of TBI among  
324 patients with severe trauma. Use of comprehensive prehospital information and certain  
325 machine learning approaches led to increased performance with a diminished false positive  
326 rate compared to those of the traditional statistical model.

327 Several studies reported that EMS providers' assessment using prehospital  
328 information is effective for the identification of patients with severe trauma who require  
329 direct transport to a trauma center.<sup>37-39</sup> Because TBI accounts for a significant portion of  
330 patients with severe trauma,<sup>38</sup> and the majority of patients have poor access to trauma  
331 centers,<sup>40</sup> identification of TBI among patients with severe trauma by EMS providers could  
332 contribute to proper prehospital management and destination hospital decisions.<sup>6</sup> However,  
333 prehospital identification of TBI is challenging.<sup>41</sup> Prehospital clinical signs showed poor  
334 predictive performance for differentiating patients with TBI.<sup>12</sup> and previous prediction  
335 models related to TBI mostly focused on TBI outcomes.<sup>13 14 16</sup> One study reported the  
336 predictors for mild TBI with persistent symptoms; but a single-center case-control study

1  
2  
3  
4 337 design and ED-based model development lacks applicability to prehospital settings.<sup>32</sup> In this  
5  
6 338 study, we developed and tested TBI prediction models that used prehospital information, and  
7  
8  
9 339 we found acceptable discrimination power for the prediction of diagnosis and prognosis of  
10  
11 340 TBI. Uniquely, we incorporated various demographic variables, trauma circumstances,  
12  
13 341 patients' complaints, and EMS assessment information in the prediction models, and we  
14  
15  
16 342 adapted the machine learning algorithms.

17  
18 343         When using a cutoff for 80% sensitivity for TBI detection, the false positive rate was  
19  
20 344 19.7–39.0% (Table 2). Those false positive rate levels are plausible for detecting severe  
21  
22  
23 345 diseases in EMS settings. A previous study reported a 26% of false positive rate of EMS  
24  
25 346 triage for myocardial infarction with a sensitivity of 74% and 50% of false positive rate of  
26  
27 347 EMS recognition of stroke in sensitivity of 74%.<sup>33 34</sup> Considering the prevalence of outcomes  
28  
29 348 (24% in TBI, 22% in TBI-I, 21% in TBI-ND, and 4% in TBI-D; Table 1), there would be 16,  
30  
31 349 9, 12, and 67 false-positive patients for every 10 patients that are accurately identified as TBI,  
32  
33  
34 350 TBI-I, TBI-ND, and TBI-D, respectively. Because of the low prevalence of TBI-D, a similar  
35  
36  
37 351 specificity of the prediction model for outcomes resulted in a very low positive predictive  
38  
39 352 value and a high proportion of false positive cases, which suggested the limited applicability  
40  
41 353 of prediction models for TBI-D in prehospital settings.

42  
43 354         Consciousness-status-related variables ranging from patients' complaints to EMS  
44  
45 355 assessment showed the highest importance regardless of models and outcomes in our study.  
46  
47  
48 356 Consciousness status is closely associated with head trauma. Head trauma can result in  
49  
50 357 structural brain injury or physiological disruption of brain function, which could result in  
51  
52  
53 358 altered mental status.<sup>42</sup> Mental status is also associated with TBI severity,<sup>43</sup> and its  
54  
55 359 association with TBI outcomes have been reported.<sup>13 14 16</sup> History taking and physical  
56  
57 360 examination for altered mental status is key to early diagnosis and proper management of TBI  
58  
59  
361 in prehospital settings.<sup>44</sup>

1  
2  
3  
4 362 We adapted machine learning algorithms for the prediction of TBI-related outcomes  
5  
6 363 and found an improvement in discrimination and an increase in specificity with the same  
7  
8  
9 364 sensitivity thresholds. However, the LR model also showed acceptable or similar  
10  
11 365 performance compared to machine learning models, according to the outcomes. In clinical  
12  
13 366 prediction models, a previous systematic review reported no performance benefit of the  
14  
15 367 machine learning model over LR.<sup>45</sup> The previous study stated that machine learning models  
16  
17 368 tend to show high performance with a strong signal-to-noise ratio problem like gaming,  
18  
19 369 image recognition. However, clinical prediction problems often result in a poor signal-to-  
20  
21 370 noise ratio.<sup>45 46</sup> If we could use unstructured data, which has strong signal-to-noise ratio like  
22  
23 371 continuous vital sign monitoring data or audiovisual data for patients' appearance, machine  
24  
25 372 learning models might perform better than LR models. In addition, if we analyzed more  
26  
27 373 patient data, the performance improvement of machine models might be elucidated.

31  
32 374 Precise assessment in prehospital field could contribute to improved patient-related  
33  
34 375 outcomes. High demand of EMS call and response,<sup>47</sup> disparity in accessibility to definitive  
35  
36 376 care capable hospitals according to regions,<sup>40</sup> and the importance of timely management in  
37  
38 377 acute disease care are the chief reasons behind the necessity for the accurate assessment of  
39  
40 378 EMS providers. Although information acquisition and processing is quite difficult in  
41  
42 379 prehospital areas, various instruments and information systems could attribute to diminish  
43  
44 380 those problems. Complex data acquisition like mobile CT or other unstructured data<sup>48 49</sup>,  
45  
46 381 information sharing through telemedicine,<sup>50</sup> and decision support tools in prehospital  
47  
48 382 environments<sup>51</sup> could contribute to the accurate assessment of EMS providers. More  
49  
50 383 information acquisition and real-time processing of those data could improve the clinical  
51  
52 384 prediction models in prehospital areas, which could lead to the improvement of patients'  
53  
54 385 safety and outcomes.

1  
2  
3  
4 386 Our study had several limitations. First, our data were collected at three teaching  
5  
6 387 hospitals in urban areas of South Korea. Therefore, external validation for other areas should  
7  
8  
9 388 be conducted to generalize the developed prediction model. Second, we used retrospective  
10  
11 389 analysis of electronically collected prehospital and hospital data. There might be various  
12  
13 390 information loss and missing data. We treated missing status as a separate category for our  
14  
15 391 analysis;<sup>52</sup> however, there could be different reasons for missing data. Third, there is a  
16  
17 392 possibility that the prediction model was overfitted or underfitted. To minimize this issue, we  
18  
19 393 rigorously searched hyperparameters and carefully chose hyperparameters according to the  
20  
21 394 performance in independent validation cohorts. Lastly, this study was performed in an  
22  
23 395 intermediate-service-level EMS system. The generalization of our study findings to different  
24  
25 396 EMS settings should be made with caution.

26  
27  
28  
29 397 In conclusion, we presented data on TBI among patients with severe trauma assessed  
30  
31 398 by EMS providers, and our results inform the development of prediction models for the  
32  
33 399 diagnosis and prognosis of TBI in our population. We used various information that can be  
34  
35 400 obtained in prehospital settings and showed acceptable outcome performance. The consistent  
36  
37 401 importance of consciousness-status-related variables emphasizes the importance of  
38  
39 402 assessment and monitoring of consciousness status in prehospital areas. Although  
40  
41 403 prospective, and implementation studies are needed for TBI prediction in prehospital areas,  
42  
43 404 our study outlined a novel method for the precise assessment of EMS providers using a  
44  
45 405 machine-learning-based prediction model. Further collection of various types of patient-  
46  
47 406 related data would contribute to the enhanced performance of the clinical prediction model in  
48  
49 407 prehospital settings.

50  
51  
52  
53  
54 408

1  
2  
3  
4 **409 Author Contribution Statement**

5  
6  
7 410 YHC and JH Park designed and developed the study, analysed and interpreted the data, and  
8  
9 411 drafted the initial manuscript. KJH, YSR, KJS and SDS were involved in the acquisition of  
10  
11 412 data, the development of the research question and assisted with analysis and interpretation of  
12  
13  
14 413 data. All authors revised the drafts for intellectual content and edited the manuscript. All  
15  
16 414 authors reviewed and approved the final draft.

17  
18  
19  
20 415

21  
22  
23 **416 Funding**

24  
25  
26 417 This study was supported by grant No. '04-2019-0680' from the Seoul National University  
27  
28 418 Hospital Research Fund.

29  
30  
31 419

32  
33  
34 **420 Competing Interests**

35  
36 421 There are no conflicts of interest for all authors in this study.

37  
38  
39 422

40  
41 **423 Patients consent**

42  
43 424 Not required

44  
45  
46 425

47  
48  
49 **426 Data availability statement**

50  
51 427 No data are available. We do not have ethics approval to share data.

52  
53  
54 428

1  
2  
3  
4 429 **Ethical statements**  
5

6 430 This study complied with the Declaration of Helsinki, and its protocol was approved by the  
7  
8 431 Institutional Review Board of the Seoul National University Hospital with a waiver of  
9  
10 432 informed consent (IRB No: E-2006-004-1128).  
11  
12  
13 433

14  
15  
16  
17 434 **References**  
18

- 19 435 1. Maas AI, Stocchetti N, Bullock R. Moderate and severe traumatic brain injury in adults. *The*  
20  
21 436 *Lancet Neurology* 2008;7(8):728-41.  
22  
23  
24 437 2. Hsia RY, Markowitz AJ, Lin F, et al. Ten-year trends in traumatic brain injury: a  
25  
26 438 retrospective cohort study of California emergency department and hospital revisits and  
27  
28 439 readmissions. *BMJ Open* 2018;8(12):e022297. doi: 10.1136/bmjopen-2018-022297  
29  
30 440 [published Online First: 2018/12/16]  
31  
32  
33 441 3. Finfer SR, Cohen J. Severe traumatic brain injury. *Resuscitation* 2001;48(1):77-90. doi:  
34  
35 442 10.1016/s0300-9572(00)00321-x [published Online First: 2001/02/13]  
36  
37  
38 443 4. DeWitt DS, Jenkins LW, Prough DS. Enhanced vulnerability to secondary ischemic insults  
39  
40 444 after experimental traumatic brain injury. *New Horiz* 1995;3(3):376-83. [published  
41  
42 445 Online First: 1995/08/01]  
43  
44  
45 446 5. McHugh GS, Engel DC, Butcher I, et al. Prognostic value of secondary insults in traumatic  
46  
47 447 brain injury: results from the IMPACT study. *J Neurotrauma* 2007;24(2):287-93. doi:  
48  
49 448 10.1089/neu.2006.0031 [published Online First: 2007/03/23]  
50  
51  
52 449 6. Spaite DW, Bobrow BJ, Keim SM, et al. Association of Statewide Implementation of the  
53  
54 450 Prehospital Traumatic Brain Injury Treatment Guidelines With Patient Survival  
55  
56 451 Following Traumatic Brain Injury: The Excellence in Prehospital Injury Care (EPIC)  
57  
58 452 Study. *JAMA Surg* 2019;154(7):e191152. doi: 10.1001/jamasurg.2019.1152 [published  
59  
60



- 1  
2  
3  
4 453 Online First: 2019/05/09]  
5  
6  
7 454 7. Pelieu I, Kull C, Walder B. Prehospital and Emergency Care in Adult Patients with Acute  
8  
9 455 Traumatic Brain Injury. *Med Sci (Basel)* 2019;7(1) doi: 10.3390/medsci7010012  
10  
11 456 [published Online First: 2019/01/24]  
12  
13 457 8. Goldberg SA, Rojanasartikul D, Jagoda A. The prehospital management of traumatic brain  
14  
15 458 injury. *Handb Clin Neurol* 2015;127:367-78. doi: 10.1016/B978-0-444-52892-  
16  
17 459 6.00023-4 [published Online First: 2015/02/24]  
18  
19  
20 460 9. Chi JH, Knudson MM, Vassar MJ, et al. Prehospital hypoxia affects outcome in patients  
21  
22 461 with traumatic brain injury: a prospective multicenter study. *J Trauma*  
23  
24 462 2006;61(5):1134-41. doi: 10.1097/01.ta.0000196644.64653.d8 [published Online First:  
25  
26 463 2006/11/14]  
27  
28  
29 464 10. Barton CW, Hemphill JC, Morabito D, et al. A novel method of evaluating the impact of  
30  
31 465 secondary brain insults on functional outcomes in traumatic brain-injured patients.  
32  
33 466 *Acad Emerg Med* 2005;12(1):1-6. doi: 10.1197/j.aem.2004.08.043 [published Online  
34  
35 467 First: 2005/01/07]  
36  
37  
38 468 11. Sasser SM, Hunt RC, Faul M, et al. Guidelines for field triage of injured patients:  
39  
40 469 recommendations of the National Expert Panel on Field Triage, 2011. *Morbidity and*  
41  
42 470 *Mortality Weekly Report: Recommendations and Reports* 2012;61(1):1-20.  
43  
44  
45 471 12. Ter Avest E, Taylor S, Wilson M, et al. Prehospital clinical signs are a poor predictor of  
46  
47 472 raised intracranial pressure following traumatic brain injury. *Emerg Med J*  
48  
49 473 2021;38(1):21-26. doi: 10.1136/emermed-2020-209635 [published Online First:  
50  
51 474 2020/09/20]  
52  
53  
54 475 13. Collaborators MCT, Perel P, Arango M, et al. Predicting outcome after traumatic brain  
55  
56 476 injury: practical prognostic models based on large cohort of international patients. *BMJ*  
57  
58 477 2008;336(7641):425-9. doi: 10.1136/bmj.39461.643438.25 [published Online First:

- 1  
2  
3  
4 478 2008/02/14]  
5  
6  
7 479 14. Steyerberg EW, Mushkudiani N, Perel P, et al. Predicting outcome after traumatic brain  
8  
9 480 injury: development and international validation of prognostic scores based on  
10  
11 481 admission characteristics. *PLoS Med* 2008;5(8):e165; discussion e65. doi:  
12  
13 482 10.1371/journal.pmed.0050165 [published Online First: 2008/08/08]  
14  
15  
16 483 15. Gozt AK, Hellewell SC, Thorne J, et al. Predicting outcome following mild traumatic brain  
17  
18 484 injury: protocol for the longitudinal, prospective, observational Concussion Recovery  
19  
20 485 (CREST) cohort study. *BMJ Open* 2021;11(5):e046460. doi: 10.1136/bmjopen-2020-  
21  
22 486 046460 [published Online First: 2021/05/15]  
23  
24  
25 487 16. Miller PR, Chang MC, Hoth JJ, et al. Predicting Mortality and Independence at Discharge  
26  
27 488 in the Aging Traumatic Brain Injury Population Using Data Available at Admission. *J*  
28  
29 489 *Am Coll Surg* 2017;224(4):680-85. doi: 10.1016/j.jamcollsurg.2016.12.053 [published  
30  
31 490 Online First: 2017/03/07]  
32  
33  
34 491 17. Wasserman EB, Shah MN, Jones CM, et al. Identification of a neurologic scale that  
35  
36 492 optimizes EMS detection of older adult traumatic brain injury patients who require  
37  
38 493 transport to a trauma center. *Prehosp Emerg Care* 2015;19(2):202-12. doi:  
39  
40 494 10.3109/10903127.2014.959225 [published Online First: 2014/10/08]  
41  
42  
43 495 18. Hale AT, Stonko DP, Brown A, et al. Machine-learning analysis outperforms conventional  
44  
45 496 statistical models and CT classification systems in predicting 6-month outcomes in  
46  
47 497 pediatric patients sustaining traumatic brain injury. *Neurosurgical Focus FOC*  
48  
49 498 2018;45(5):E2. doi: 10.3171/2018.8.Focus17773  
50  
51  
52 499 19. Collins GS, Reitsma JB, Altman DG, et al. Transparent Reporting of a multivariable  
53  
54 500 prediction model for Individual Prognosis Or Diagnosis (TRIPOD). *Ann Intern Med*  
55  
56 501 2015;162(10):735-6. doi: 10.7326/L15-5093-2 [published Online First: 2015/05/20]  
57  
58  
59 502 20. Sasser SM, Hunt RC, Sullivent EE, et al. Guidelines for field triage of injured patients:

- 1  
2  
3  
4 503 recommendations of the National Expert Panel on Field Triage. 2009  
5  
6 504 21. Sasser SM, Hunt RC, Faul M, et al. Guidelines for field triage of injured patients:  
7  
8 505 recommendations of the National Expert Panel on Field Triage, 2011. *MMWR Recomm*  
9  
10 506 *Rep* 2012;61(RR-1):1-20. [published Online First: 2012/01/13]  
11  
12  
13 507 22. Andelic N, Anke A, Skandsen T, et al. Incidence of hospital-admitted severe traumatic  
14  
15 508 brain injury and in-hospital fatality in Norway: a national cohort study.  
16  
17 509 *Neuroepidemiology* 2012;38(4):259-67. doi: 10.1159/000338032 [published Online  
18  
19 510 First: 2012/06/09]  
20  
21  
22 511 23. Ro YS, Shin SD, Holmes JF, et al. Comparison of clinical performance of cranial computed  
23  
24 512 tomography rules in patients with minor head injury: a multicenter prospective study.  
25  
26 513 *Acad Emerg Med* 2011;18(6):597-604. doi: 10.1111/j.1553-2712.2011.01094.x  
27  
28 514 [published Online First: 2011/06/17]  
29  
30  
31 515 24. Gang MC, Hong KJ, Shin SD, et al. New prehospital scoring system for traumatic brain  
32  
33 516 injury to predict mortality and severe disability using motor Glasgow Coma Scale,  
34  
35 517 hypotension, and hypoxia: a nationwide observational study. *Clin Exp Emerg Med*  
36  
37 518 2019;6(2):152-59. doi: 10.15441/ceem.18.027 [published Online First: 2019/07/03]  
38  
39  
40 519 25. Chen T, Guestrin C. XGBoost: A Scalable Tree Boosting System. Proceedings of the 22nd  
41  
42 520 ACM SIGKDD International Conference on Knowledge Discovery and Data Mining.  
43  
44 521 San Francisco, California, USA: Association for Computing Machinery, 2016:785–94.  
45  
46  
47 522 26. Zou H, Hastie T. Regularization and variable selection via the elastic net. *Journal of the*  
48  
49 523 *Royal Statistical Society: Series B (Statistical Methodology)* 2005;67(2):301-20. doi:  
50  
51 524 10.1111/j.1467-9868.2005.00503.x  
52  
53  
54 525 27. Dong Q, Taylor RA, Moore CL, et al. Predicting urinary tract infections in the emergency  
55  
56 526 department with machine learning. *Plos One* 2018;13(3) doi:  
57  
58 527 10.1371/journal.pone.0194085  
59  
60

- 1  
2  
3  
4 528 28. Breiman RF. Vaccines as tools for advancing more than public health: perspectives of a  
5  
6 529 former director of the National Vaccine Program office. *Clin Infect Dis*  
7  
8 530 2001;32(2):283-8. doi: 10.1086/318461 [published Online First: 2001/02/15]  
9  
10  
11 531 29. Hearst MA, Dumais ST, Osuna E, et al. Support vector machines. *IEEE Intelligent Systems*  
12  
13 532 *and their Applications* 1998;13(4):18-28. doi: 10.1109/5254.708428  
14  
15  
16 533 30. Hosmer Jr DW, Lemeshow S, Sturdivant RX. Applied logistic regression: John Wiley &  
17  
18 534 Sons 2013.  
19  
20 535 31. Fenlon C, O'Grady L, Doherty ML, et al. A discussion of calibration techniques for  
21  
22 536 evaluating binary and categorical predictive models. *Prev Vet Med* 2018;149:107-14.  
23  
24 537 doi: 10.1016/j.prevetmed.2017.11.018 [published Online First: 2018/01/02]  
25  
26  
27 538 32. Wojcik SM. Predicting mild traumatic brain injury patients at risk of persistent symptoms  
28  
29 539 in the Emergency Department. *Brain Inj* 2014;28(4):422-30. doi:  
30  
31 540 10.3109/02699052.2014.884241 [published Online First: 2014/02/26]  
32  
33  
34 541 33. Oostema JA, Konen J, Chassee T, et al. Clinical predictors of accurate prehospital stroke  
35  
36 542 recognition. *Stroke* 2015;46(6):1513-7. doi: 10.1161/STROKEAHA.115.008650  
37  
38 543 [published Online First: 2015/04/30]  
39  
40  
41 544 34. Swan PY, Nighswonger B, Boswell GL, et al. Factors associated with false-positive  
42  
43 545 emergency medical services triage for percutaneous coronary intervention. *West J*  
44  
45 546 *Emerg Med* 2009;10(4):208-12. [published Online First: 2010/01/05]  
46  
47  
48 547 35. Park JH, Shin SD, Song KJ, et al. Prediction of good neurological recovery after out-of-  
49  
50 548 hospital cardiac arrest: A machine learning analysis. *Resuscitation* 2019;142:127-35.  
51  
52 549 doi: 10.1016/j.resuscitation.2019.07.020 [published Online First: 2019/07/31]  
53  
54  
55 550 36. Weng SF, Reys J, Kai J, et al. Can machine-learning improve cardiovascular risk prediction  
56  
57 551 using routine clinical data? *PLoS One* 2017;12(4):e0174944. doi:  
58  
59 552 10.1371/journal.pone.0174944 [published Online First: 2017/04/05]  
60

- 1  
2  
3  
4 553 37. Esposito TJ, Offner PJ, Jurkovich GJ, et al. Do prehospital trauma center triage criteria  
5  
6 554 identify major trauma victims? *Arch Surg* 1995;130(2):171-6. doi:  
7  
8 555 10.1001/archsurg.1995.01430020061010 [published Online First: 1995/02/01]  
9  
10  
11 556 38. Ocak G, Sturms LM, Hoogeveen JM, et al. Prehospital identification of major trauma  
12  
13 557 patients. *Langenbecks Arch Surg* 2009;394(2):285-92. doi: 10.1007/s00423-008-0340-  
14  
15 558 4 [published Online First: 2008/06/27]  
16  
17  
18 559 39. Fries GR, McCalla G, Levitt MA, et al. A prospective comparison of paramedic judgment  
19  
20 560 and the trauma triage rule in the prehospital setting. *Ann Emerg Med* 1994;24(5):885-  
21  
22 561 9. doi: 10.1016/s0196-0644(94)70207-1 [published Online First: 1994/11/01]  
23  
24  
25 562 40. Branas CC, MacKenzie EJ, Williams JC, et al. Access to trauma centers in the United States.  
26  
27 563 *JAMA* 2005;293(21):2626-33. doi: 10.1001/jama.293.21.2626 [published Online First:  
28  
29 564 2005/06/02]  
30  
31  
32 565 41. Whiting MD, Dengler BA, Rodriguez CL, et al. Prehospital Detection of Life-Threatening  
33  
34 566 Intracranial Pathology: An Unmet Need for Severe TBI in Austere, Rural, and Remote  
35  
36 567 Areas. *Front Neurol* 2020;11:599268. doi: 10.3389/fneur.2020.599268 [published  
37  
38 568 Online First: 2020/11/17]  
39  
40  
41 569 42. Management of Concussion/m TBIWG. VA/DoD Clinical Practice Guideline for  
42  
43 570 Management of Concussion/Mild Traumatic Brain Injury. *J Rehabil Res Dev*  
44  
45 571 2009;46(6):CP1-68. [published Online First: 2010/01/30]  
46  
47  
48 572 43. Grote S, Bocker W, Mutschler W, et al. Diagnostic value of the Glasgow Coma Scale for  
49  
50 573 traumatic brain injury in 18,002 patients with severe multiple injuries. *J Neurotrauma*  
51  
52 574 2011;28(4):527-34. doi: 10.1089/neu.2010.1433 [published Online First: 2011/01/27]  
53  
54  
55 575 44. Badjatia N, Carney N, Crocco TJ, et al. Guidelines for prehospital management of traumatic  
56  
57 576 brain injury 2nd edition. *Prehosp Emerg Care* 2008;12 Suppl 1:S1-52. doi:  
58  
59 577 10.1080/10903120701732052 [published Online First: 2008/09/06]  
60

- 1  
2  
3  
4 578 45. Christodoulou E, Ma J, Collins GS, et al. A systematic review shows no performance  
5  
6 579 benefit of machine learning over logistic regression for clinical prediction models. *J*  
7  
8 580 *Clin Epidemiol* 2019;110:12-22. doi: 10.1016/j.jclinepi.2019.02.004 [published Online  
9  
10 581 First: 2019/02/15]
- 11  
12  
13 582 46. Ennis M, Hinton G, Naylor D, et al. A comparison of statistical learning methods on the  
14  
15 583 Gusto database. *Stat Med* 1998;17(21):2501-8. doi: 10.1002/(sici)1097-  
16  
17 584 0258(19981115)17:21<2501::aid-sim938>3.0.co;2-m [published Online First:  
18  
19 585 1998/11/20]
- 20  
21  
22 586 47. Crowe RP, Bower JK, Cash RE, et al. Association of Burnout with Workforce-Reducing  
23  
24 587 Factors among EMS Professionals. *Prehosp Emerg Care* 2018;22(2):229-36. doi:  
25  
26 588 10.1080/10903127.2017.1356411 [published Online First: 2017/08/26]
- 27  
28  
29 589 48. Hov MR, Zakariassen E, Lindner T, et al. Interpretation of Brain CT Scans in the Field by  
30  
31 590 Critical Care Physicians in a Mobile Stroke Unit. *J Neuroimaging* 2018;28(1):106-11.  
32  
33 591 doi: 10.1111/jon.12458 [published Online First: 2017/08/03]
- 34  
35  
36 592 49. Nakada TA, Masunaga N, Nakao S, et al. Development of a prehospital vital signs chart  
37  
38 593 sharing system. *Am J Emerg Med* 2016;34(1):88-92. doi: 10.1016/j.ajem.2015.09.048  
39  
40 594 [published Online First: 2015/10/29]
- 41  
42  
43 595 50. Kim Y, Groombridge C, Romero L, et al. Decision Support Capabilities of Telemedicine  
44  
45 596 in Emergency Prehospital Care: Systematic Review. *J Med Internet Res*  
46  
47 597 2020;22(12):e18959. doi: 10.2196/18959 [published Online First: 2020/12/09]
- 48  
49  
50 598 51. Reisner AT, Khitrov MY, Chen L, et al. Development and validation of a portable platform  
51  
52 599 for deploying decision-support algorithms in prehospital settings. *Appl Clin Inform*  
53  
54 600 2013;4(3):392-402. doi: 10.4338/ACI-2013-04-RA-0023 [published Online First:  
55  
56 601 2013/10/25]
- 57  
58  
59 602 52. Maslove DM, Podchiyska T, Lowe HJ. Discretization of continuous features in clinical

1  
2  
3  
4  
5  
6  
7  
8  
9  
10  
11  
12  
13  
14  
15  
16  
17  
18  
19  
20  
21  
22  
23  
24  
25  
26  
27  
28  
29  
30  
31  
32  
33  
34  
35  
36  
37  
38  
39  
40  
41  
42  
43  
44  
45  
46  
47  
48  
49  
50  
51  
52  
53  
54  
55  
56  
57  
58  
59  
60

603 datasets. *J Am Med Inform Assoc* 2013;20(3):544-53. doi: 10.1136/amiajnl-2012-  
604 000929 [published Online First: 2012/10/13]

605

For peer review only

1  
2  
3  
4 606 **Figure legends**  
5

6  
7 607 Figure 1. Population flow. EMS, emergency medical service; OHCA, out-of-hospital cardiac  
8  
9 608 arrest; TBI, traumatic brain injury.

10 609  
11  
12  
13  
14  
15  
16  
17  
18  
19  
20  
21  
22  
23  
24  
25  
26  
27  
28  
29  
30  
31  
32  
33  
34  
35  
36  
37  
38  
39  
40  
41  
42  
43  
44  
45  
46  
47  
48  
49  
50  
51  
52  
53  
54  
55  
56  
57  
58  
59  
60

For peer review only



610 Table 1. Key characteristics of the development and test cohorts.

|                              | n (%) or Median (IQR) |                    |               | P      |
|------------------------------|-----------------------|--------------------|---------------|--------|
|                              | Total                 | Development cohort | Test cohort   |        |
| Total                        | N = 1169              | n = 867            | n = 302       |        |
| Demographics                 |                       |                    |               |        |
| Age, years                   | 53 (36–66)            | 52 (35–66)         | 56 (40–69)    | < 0.01 |
| Male                         | 809 (69.2)            | 592 (68.3)         | 217 (71.9)    | 0.25   |
| Job, unemployed              | 299 (25.6)            | 197 (22.7)         | 102 (33.8)    | < 0.01 |
| Diabetes                     | 62 (5.3)              | 35 (4.0)           | 27 (8.9)      | < 0.01 |
| Hypertension                 | 105 (9.0)             | 61 (7.0)           | 44 (14.6)     | < 0.01 |
| Circumstances of trauma      |                       |                    |               |        |
| Location, road/highway       | 444 (38.0)            | 326 (37.6)         | 118 (39.1)    | 0.65   |
| Season, summer               | 336 (28.7)            | 253 (29.2)         | 83 (27.5)     | 0.57   |
| Weekday, weekend             | 811 (69.4)            | 599 (69.1)         | 212 (70.2)    | 0.72   |
| Time, 6 p.m. to midnight     | 361 (30.9)            | 265 (30.6)         | 96 (31.8)     | 0.69   |
| Mechanism of injury, TA      | 500 (42.8)            | 375 (43.3)         | 125 (41.4)    | 0.57   |
| Chief complaint              |                       |                    |               |        |
| Fracture/abrasion/laceration | 302 (25.8)            | 204 (23.5)         | 98 (32.5)     | < 0.01 |
| EMS vital sign assessment    |                       |                    |               |        |
| SBP, mmHg*                   | 130 (109–150)         | 130 (104–146)      | 131 (115–150) | < 0.01 |
| DBP, mmHg*                   | 80 (70–91)            | 80 (69–90)         | 80 (70–92)    | 0.21   |
| RR, mmHg*                    | 18 (16–20)            | 18 (16–20)         | 18 (16–20)    | 0.33   |
| HR, /min*                    | 86 (75–99)            | 86 (74–99)         | 86 (76–100)   | 0.40   |
| SpO <sub>2</sub> , %*        | 98 (95–99)            | 98 (95–99)         | 98 (96–99)    | 0.67   |
| AVPU scale, Alert            | 714 (61.1)            | 504 (58.1)         | 210 (69.5)    | < 0.01 |
| EMS management               |                       |                    |               |        |
| Intravenous route            | 176 (15.1)            | 129 (14.9)         | 47 (15.6)     | 0.77   |
| Hemorrhage control           | 586 (50.1)            | 426 (49.1)         | 160 (53.0)    | 0.25   |
| Spinal motion restriction    | 811 (69.4)            | 606 (69.9)         | 205 (67.9)    | 0.51   |
| Oxygen supply                | 233 (19.9)            | 176 (20.3)         | 57 (18.9)     | 0.59   |
| In-hospital mortality        | 90 (7.7)              | 74 (8.5)           | 16 (5.3)      | 0.07   |
| Outcomes                     |                       |                    |               |        |
| TBI                          | 281 (24.0)            | 215 (24.8)         | 66 (21.9)     | 0.30   |
| TBI with intracranial injury | 251 (21.5)            | 195 (22.5)         | 56 (18.5)     | 0.15   |
| TBI-related non-discharge    | 249 (21.3)            | 192 (22.1)         | 57 (18.9)     | 0.23   |
| TBI-related death            | 43 (3.7)              | 32 (3.7)           | 11 (3.6)      | 0.95   |

611 IQR, interquartile range; TA, traffic accident; SBP, systolic blood pressure; DBP, diastolic  
612 blood pressure; RR, respiratory rate; ED, emergency department; TBI, traumatic brain injury.

613 Table 2. Discrimination and reclassification of prediction models for outcomes on test  
614 cohort.

| Outcome | Model | AUROC (95% CI)       | p <sup>a</sup> | NRI (95% CI)           | p <sup>b</sup> | AUPRC |
|---------|-------|----------------------|----------------|------------------------|----------------|-------|
| TBI     |       |                      |                |                        |                |       |
|         | LR    | 0.770 (0.698, 0.841) | NA             | NA                     | NA             | 0.492 |
|         | XGB   | 0.809 (0.743, 0.876) | 0.04           | 0.689 (0.427, 0.951)   | < 0.01         | 0.552 |
|         | SVM   | 0.776 (0.708, 0.844) | 0.77           | 0.339 (0.072, 0.607)   | 0.01           | 0.479 |
|         | RF    | 0.800 (0.735, 0.865) | 0.13           | 0.308 (0.047, 0.569)   | 0.02           | 0.532 |
|         | EN    | 0.799 (0.732, 0.867) | 0.06           | 0.698 (0.441, 0.954)   | < 0.01         | 0.564 |
| TBI-I   |       |                      |                |                        |                |       |
|         | LR    | 0.820 (0.751, 0.890) | NA             | NA                     | NA             | 0.551 |
|         | XGB   | 0.838 (0.775, 0.901) | 0.28           | 0.539 (0.258, 0.821)   | < 0.01         | 0.554 |
|         | SVM   | 0.812 (0.748, 0.875) | 0.66           | 0.729 (0.464, 0.994)   | < 0.01         | 0.469 |
|         | RF    | 0.836 (0.772, 0.899) | 0.38           | 0.333 (0.058, 0.607)   | 0.02           | 0.552 |
|         | EN    | 0.844 (0.779, 0.910) | 0.15           | 1.093 (0.845, 1.342)   | < 0.01         | 0.606 |
| TBI-ND  |       |                      |                |                        |                |       |
|         | LR    | 0.767 (0.690, 0.844) | NA             | NA                     | NA             | 0.482 |
|         | XGB   | 0.800 (0.727, 0.873) | 0.07           | 0.605 (0.326, 0.884)   | < 0.01         | 0.496 |
|         | SVM   | 0.778 (0.704, 0.852) | 0.56           | 0.285 (-0.001, 0.572)  | 0.05           | 0.477 |
|         | RF    | 0.809 (0.739, 0.880) | 0.03           | 0.194 (-0.059, 0.448)  | 0.13           | 0.535 |
|         | EN    | 0.811 (0.741, 0.882) | 0.02           | 0.768 (0.496, 1.039)   | < 0.01         | 0.551 |
| TBI-D   |       |                      |                |                        |                |       |
|         | LR    | 0.664 (0.490, 0.838) | NA             | NA                     | NA             | 0.138 |
|         | XGB   | 0.714 (0.512, 0.917) | 0.64           | -0.026 (-0.605, 0.553) | 0.93           | 0.094 |
|         | SVM   | 0.814 (0.718, 0.910) | 0.09           | 0.209 (-0.325, 0.742)  | 0.44           | 0.140 |
|         | RF    | 0.889 (0.801, 0.976) | < 0.01         | -0.204 (-0.742, 0.334) | 0.46           | 0.196 |
|         | EN    | 0.871 (0.764, 0.978) | 0.01           | 0.119 (-0.415, 0.654)  | 0.66           | 0.293 |

615 <sup>a</sup>Comparing the AUROC and the logistic regression model.

616 <sup>b</sup>Comparing the NRI and the logistic regression model.

617 AUROC, area under the receiver operating characteristic curve; CI, confidence interval;  
618 NRI, net reclassification index; AUPRC, area under precision-recall curve; TBI,  
619 traumatic brain injury, TBI-I, traumatic brain injury with intracranial injury; TBI-ND;  
620 traumatic brain injury with non-discharge; TBI-D, traumatic brain injury with death;  
621 LR, logistic regression analysis; XGB, extreme gradient boosting; SVM, support vector  
622 machine; RF, random forest; EN, elastic net

623

624

625

626 Table 3. Test characteristics of prediction models for outcomes on test cohort.

| Outcome | Model | Specificity (95% CI) | Sensitivity (95% CI) | PPV (95% CI)      | NPV (95% CI)      | Cutoff |
|---------|-------|----------------------|----------------------|-------------------|-------------------|--------|
| TBI     |       |                      |                      |                   |                   |        |
|         | LR    | 47.5 (40.9, 54.0)    | 80.3 (68.7, 89.1)    | 29.9 (23.3, 37.3) | 89.6 (82.9, 94.3) | 0.136  |
|         | XGB   | 72.5 (66.3, 78.1)    | 80.3 (68.7, 89.1)    | 44.9 (35.7, 54.3) | 92.9 (88.2, 96.2) | 0.268  |
|         | SVM   | 64.8 (58.4, 70.9)    | 80.3 (68.7, 89.1)    | 39.0 (30.7, 47.7) | 92.2 (87.0, 95.8) | 0.191  |
|         | RF    | 68.2 (61.9, 74.1)    | 80.3 (68.7, 89.1)    | 41.4 (32.8, 50.4) | 92.5 (87.6, 96.0) | 0.185  |
|         | EN    | 61.0 (54.5, 67.3)    | 80.3 (68.7, 89.1)    | 36.6 (28.7, 44.9) | 91.7 (86.3, 95.5) | 0.205  |
| TBI-I   |       |                      |                      |                   |                   |        |
|         | LR    | 71.1 (65.0, 76.7)    | 80.4 (67.6, 89.8)    | 38.8 (29.9, 48.3) | 94.1 (89.7, 97.0) | 0.164  |
|         | XGB   | 74.0 (68.0, 79.4)    | 80.4 (67.6, 89.8)    | 41.3 (31.9, 51.1) | 94.3 (90.0, 97.1) | 0.143  |
|         | SVM   | 71.1 (65.0, 76.7)    | 80.4 (67.6, 89.8)    | 38.8 (29.9, 48.3) | 94.1 (89.7, 97.0) | 0.172  |
|         | RF    | 76.0 (70.2, 81.2)    | 80.4 (67.6, 89.8)    | 43.3 (33.6, 53.3) | 94.4 (90.3, 97.2) | 0.205  |
|         | EN    | 81.3 (75.9, 86.0)    | 80.4 (67.6, 89.8)    | 49.5 (38.8, 60.1) | 94.8 (90.9, 97.4) | 0.204  |
| TBI-ND  |       |                      |                      |                   |                   |        |
|         | LR    | 46.1 (39.8, 52.6)    | 80.7 (68.1, 90.0)    | 25.8 (19.6, 32.9) | 91.1 (84.7, 95.5) | 0.090  |
|         | XGB   | 66.5 (60.2, 72.4)    | 80.7 (68.1, 90.0)    | 35.9 (27.7, 44.9) | 93.7 (89.0, 96.8) | 0.242  |
|         | SVM   | 59.2 (52.7, 65.4)    | 80.7 (68.1, 90.0)    | 31.5 (24.1, 39.7) | 92.9 (87.7, 96.4) | 0.147  |
|         | RF    | 60.4 (54.0, 66.6)    | 80.7 (68.1, 90.0)    | 32.2 (24.6, 40.5) | 93.1 (88.0, 96.5) | 0.138  |
|         | EN    | 74.3 (68.3, 79.6)    | 80.7 (68.1, 90.0)    | 42.2 (32.8, 52.0) | 94.3 (90.0, 97.1) | 0.201  |
| TBI-D   |       |                      |                      |                   |                   |        |
|         | LR    | 42.6 (36.9, 48.5)    | 81.8 (48.2, 97.7)    | 5.1 (2.4, 9.5)    | 98.4 (94.4, 99.8) | 0.005  |
|         | XGB   | 57.7 (51.8, 63.5)    | 81.8 (48.2, 97.7)    | 6.8 (3.2, 12.5)   | 98.8 (95.8, 99.9) | 0.002  |
|         | SVM   | 74.2 (68.8, 79.2)    | 81.8 (48.2, 97.7)    | 10.7 (5.0, 19.4)  | 99.1 (96.7, 99.9) | 0.039  |
|         | RF    | 74.9 (69.5, 79.8)    | 81.8 (48.2, 97.7)    | 11.0 (5.1, 19.8)  | 99.1 (96.8, 99.9) | 0.005  |
|         | EN    | 79.0 (73.9, 83.6)    | 81.8 (48.2, 97.7)    | 12.9 (6.1, 23.0)  | 99.1 (96.9, 99.9) | 0.033  |

627 TBI, traumatic brain injury; TBI-I, traumatic brain injury with intracranial injury; TBI-  
628 ND; traumatic brain injury with non-discharge; TBI-D, traumatic brain injury with  
629 death; LR, logistic regression analysis; XGB, extreme gradient boosting; SVM, support  
630 vector machine; RF, random forest; EN, elastic net.  
631

632 Table 4. Top 5 important variables for outcomes in descending order using model  
 633 specific metrics

| Outcome | Rank | LR                    | XGB                   | RF                    | EN                    |
|---------|------|-----------------------|-----------------------|-----------------------|-----------------------|
| TBI     |      |                       |                       |                       |                       |
|         | 1    | Loss of consciousness | Loss of consciousness | Loss of consciousness | Loss of consciousness |
|         | 2    | GCS, Eye, 1           | GCS, Eye, 1           | GCS, Eye, 1           | GCS, Motor, 1         |
|         | 3    | GCS, Verbal, 1        | GCS, Verbal, 1        | GCS, Verbal, 1        | GCS, Motor, 2         |
|         | 4    | Light reflex          | Other mechanism       | Light reflex          | GCS, Eye, 1           |
|         | 5    | GCS, Motor, 1         | GCS, Verbal, 2        | GCS, Motor, 1         | GCS, Verbal, 1        |
| TBI-I   |      |                       |                       |                       |                       |
|         | 1    | Loss of consciousness | Loss of consciousness | Loss of consciousness | GCS, Eye, 1           |
|         | 2    | GCS, Eye, 1           | GCS, Eye, 1           | GCS, Eye, 1           | Loss of consciousness |
|         | 3    | GCS, Verbal, 1        | GCS, Verbal, 1        | GCS, Verbal, 1        | GCS, Motor, 1         |
|         | 4    | Light reflex          | GCS, Verbal, 2        | Light reflex          | GCS, Verbal, 1        |
|         | 5    | GCS, Motor, 1         | Other mechanism       | GCS, Motor, 1         | Light reflex          |
| TBI-ND  |      |                       |                       |                       |                       |
|         | 1    | Loss of consciousness | Loss of consciousness | Loss of consciousness | Loss of consciousness |
|         | 2    | GCS, Eye, 1           | GCS, Eye, 1           | GCS, Eye, 1           | GCS, Eye, 1           |
|         | 3    | GCS, Verbal, 1        | GCS, Verbal, 1        | GCS, Verbal, 1        | GCS, Motor, 1         |
|         | 4    | Light reflex          | GCS, Verbal, 2        | GCS, Verbal, 2        | GCS, Verbal, 1        |
|         | 5    | GCS, Motor, 1         | GCS, Motor, 1         | GCS, Motor, 4         | Light reflex          |
| TBI-D   |      |                       |                       |                       |                       |
|         | 1    | Loss of consciousness | GCS, Verbal, 1        | GCS, Verbal, 1        | GCS, Motor, 2         |
|         | 2    | GCS, Verbal, 1        | Oxygen saturation<96% | Light reflex          | GCS, Verbal, 1        |
|         | 3    | GCS, Eye, 1           | Fall mechanism        | Loss of consciousness | Loss of consciousness |
|         | 4    | Light reflex          | Afternoon             | GCS, Eye, 1           | Age over 80           |
|         | 5    | GCS, Motor, 1         | Light reflex          | GCS, Motor, 1         | HR 87-99              |

634 TBI, traumatic brain injury, TBI-I, traumatic brain injury with intracranial injury; TBI-  
 635 ND; traumatic brain injury with non-discharge; TBI-D, traumatic brain injury with  
 636 death; LR, logistic regression; XGB, extreme gradient boosting; RF, random forest; EN,  
 637 elastic net; GCS, Glasgow coma scale; HR, heart rate.

638

1  
2  
3  
4  
5  
6  
7  
8  
9  
10  
11  
12  
13  
14  
15  
16  
17  
18  
19  
20  
21  
22  
23  
24  
25  
26  
27  
28  
29  
30  
31  
32  
33  
34  
35  
36  
37  
38  
39  
40  
41  
42  
43  
44  
45  
46  
47  
48  
49  
50  
51  
52  
53  
54  
55  
56  
57  
58  
59  
60

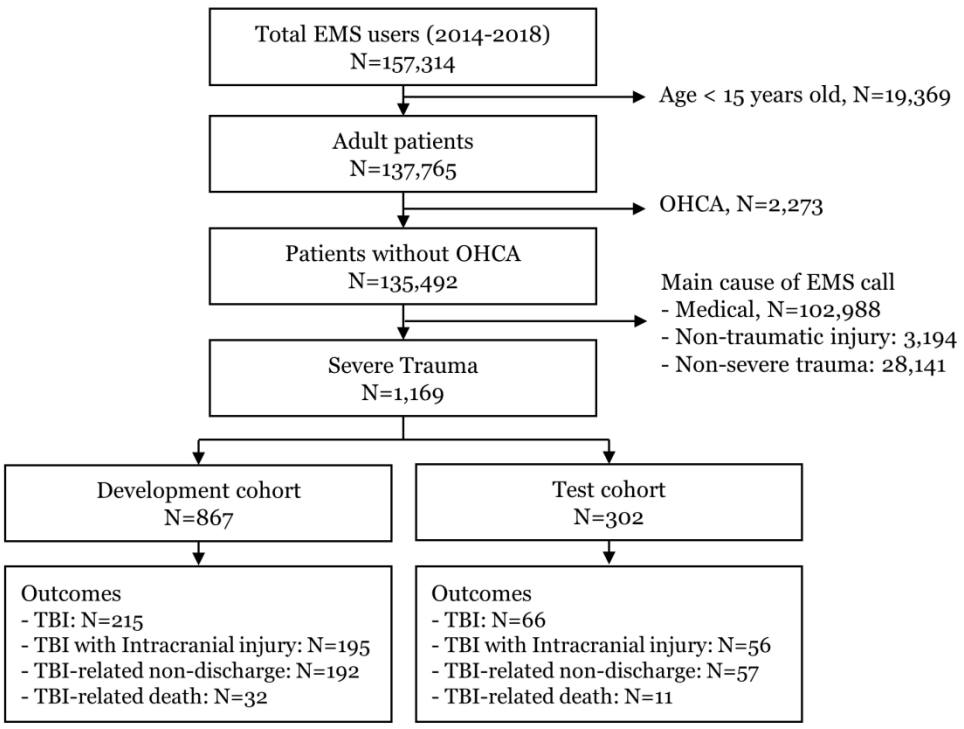

Figure 1

165x119mm (300 x 300 DPI)

Supplementary Table 1. List of analyzed variables.

| Variables                 | Descriptions                                  | Type of raw data | Category                                                                                                               | Preprocessing                                                     |
|---------------------------|-----------------------------------------------|------------------|------------------------------------------------------------------------------------------------------------------------|-------------------------------------------------------------------|
| Gender                    | Sex of the patients                           | Binary           | Male, Female                                                                                                           |                                                                   |
| Age                       | Age of patients                               | Continuous       | 15-39 years, 40-59 years, 60-79 years, and 80- years                                                                   | Discretization and one hot encoding                               |
| Job                       | Job of patients                               | Categorical      | Unemployed, Student/Housewife; Office/Commercial/Service workers; Industrial/Agricultural/Fishery/Miner worker; Others | One hot encoding<br>Missing data were classified into others      |
| Diabetes                  | History of diabetes mellitus                  | Binary           | Yes, No                                                                                                                | Missing data were classified into no                              |
| Hypertension              | History of hypertension                       | Binary           | Yes, No                                                                                                                | Missing data were classified into no                              |
| Location of injury        | Location of injury                            | Categorical      | home/residential area/medical facility/school/gym; Road/highway; Off-road traffic area; Others                         | One hot encoding<br>Missing data were classified into others      |
| Season                    | Season when injury occurred                   | Categorical      | Spring, Summer, Fall, Winter                                                                                           | One hot encoding                                                  |
| Weekend                   | Whether Injury occurred on weekday or weekend | Binary           | Weekday, Weekend                                                                                                       |                                                                   |
| Daytime                   | When injury was occurred                      | Categorical      | Night (Midnight to 5AM), Morning (6AM to 11AM), Afternoon (Midday to 5PM), Evening (6PM to 11PM)                       | One hot encoding<br>Missing time were imputed using EMS call time |
| Mechanism of injury       | Mechanism of injury                           | Categorical      | Slip down, Fall down, Traffic accident, Other                                                                          | One hot encoding<br>Missing data were classified into others      |
| Glasgow coma scale eye    | Eye element of Glasgow coma scale             | Categorical      | 1;2;3;4;Unknown                                                                                                        | One hot encoding                                                  |
| Glasgow coma scale Verbal | Verbal element of Glasgow coma scale          | Categorical      | 1;2;3;4;5;Unknown                                                                                                      | One hot encoding                                                  |
| Glasgow coma scale Motor  | Motor element of Glasgow coma scale           | Categorical      | 1;2;3;4;5;6;Unknown                                                                                                    | One hot encoding                                                  |
| Light Reflex any Abnormal | Any abnormality of light reflex on any side   | Categorical      | No, Yes, Unknown                                                                                                       | One hot encoding<br>Missing data were classified into unknown     |

|                              |       |                                         |            |                                                           |                                                                                                                                                                                         |
|------------------------------|-------|-----------------------------------------|------------|-----------------------------------------------------------|-----------------------------------------------------------------------------------------------------------------------------------------------------------------------------------------|
| Systolic blood pressure      | blood | Systolic blood pressure                 | Continuous | -107 mmHg, 108-130 mmHg, 131-145 mmHg, 146- mmHg, Unknown | Discretization and one hot encoding<br>Cutoff values for categories were calculated from median and interquartile range of training cohort<br>Missing data were classified into unknown |
| Diastolic pressure           | blood | Diastolic blood pressure                | Continuous | -69 mmHg, 70-80 mmHg, 81-91 mmHg, 92- mmHg, Unknown       | Discretization and one hot encoding<br>Cutoff values for categories were calculated from median and interquartile range of training cohort<br>Missing data were classified into unknown |
| Heart rate                   |       | Heart rate                              | Continuous | -74/min, 75-86/min, 87-99/min, 100-/min, Unknown          | Discretization and one hot encoding<br>Cutoff values for categories were calculated from median and interquartile range of training cohort<br>Missing data were classified into unknown |
| Respiratory rate             |       | Respiratory rate                        | Continuous | -16/min, 17-18/min, 19-20/min, 21-/min, Unknown           | Discretization and one hot encoding<br>Cutoff values for categories were calculated from median and interquartile range of training cohort<br>Missing data were classified into unknown |
| Oxygen saturation            |       | Oxygen saturation                       | Continuous | -95%, 96-98%, 99%, 100%, Unknown                          | Discretization and one hot encoding<br>Cutoff values for categories were calculated from median and interquartile range of training cohort<br>Missing data were classified into unknown |
| Body temperature             |       | Body temperature                        | Continuous | -36°C, 36.1-36.3°C, 36.4-36.8°C, 36.9-°C, Unknown         | Discretization and one hot encoding<br>Cutoff values for categories were calculated from median and interquartile range of training cohort<br>Missing data were classified into unknown |
| Chest pain or abdominal pain |       | Symptom of chest pain or abdominal pain | Binary     | Yes, No                                                   |                                                                                                                                                                                         |

|                                   |                                              |        |         |  |
|-----------------------------------|----------------------------------------------|--------|---------|--|
| Fracture, abrasion, or laceration | Symptom of fracture, abrasion, or laceration | Binary | Yes, No |  |
| Loss of consciousness             | Symptom of loss of consciousness             | Binary | Yes, No |  |
| Dyspnea                           | Symptom of dyspnea                           | Binary | Yes, No |  |
| Nose bleeding                     | Symptom of nose bleeding                     | Binary | Yes, No |  |
| Nausea or vomiting                | Symptom of nausea or vomiting                | Binary | Yes, No |  |
| Headache, paralysis or dizziness  | Symptom of headache, paralysis or dizziness  | Binary | Yes, No |  |



Supplementary Table 2. Demographic characteristics of development and test cohorts

| Characteristics                                 | N (%) or Median (IQR) |             |            | P-value |
|-------------------------------------------------|-----------------------|-------------|------------|---------|
|                                                 | Total                 | Development | Test       |         |
| Total                                           | 1169                  | 867         | 302        |         |
| Demographics                                    |                       |             |            |         |
| Male                                            | 809 (69.2)            | 592 (68.3)  | 217 (71.9) | 0.25    |
| Age, years                                      | 53 (36-66)            | 52 (35-66)  | 56 (40-69) | <0.01   |
| Job of patients                                 |                       |             |            | <0.01   |
| Unemployed                                      | 299 (25.6)            | 197 (22.7)  | 102 (33.8) |         |
| Student/Housewife                               | 161 (13.8)            | 129 (14.9)  | 32 (10.6)  |         |
| Office/Commercial/Service worker                | 283 (24.2)            | 176 (20.3)  | 107 (35.4) |         |
| Industrial/Agricultural/Fishery/Minery worker   | 36 (3.1)              | 25 (2.9)    | 11 (3.6)   |         |
| Others                                          | 390 (33.4)            | 340 (39.2)  | 50 (16.6)  |         |
| Past medical history                            |                       |             |            |         |
| Diabetes                                        | 62 (5.3)              | 35 (4.0)    | 27 (8.9)   | <0.01   |
| Hypertension                                    | 105 (9.0)             | 61 (7.0)    | 44 (14.6)  | <0.01   |
| Circumstances of Trauma                         |                       |             |            |         |
| Location of trauma                              |                       |             |            | 0.52    |
| Residential/Nursing/Education/Exercise facility | 303 (25.9)            | 218 (25.1)  | 85 (28.1)  |         |
| Road/Highway                                    | 444 (38.0)            | 326 (37.6)  | 118 (39.1) |         |
| Off-road traffic area                           | 181 (15.5)            | 140 (16.1)  | 41 (13.6)  |         |
| Others                                          | 241 (20.6)            | 183 (21.1)  | 58 (19.2)  |         |
| Season of trauma                                |                       |             |            | <0.01   |
| Spring                                          | 249 (21.3)            | 167 (19.3)  | 82 (27.2)  |         |
| Summer                                          | 336 (28.7)            | 253 (29.2)  | 83 (27.5)  |         |
| Fall                                            | 304 (26.0)            | 242 (27.9)  | 62 (20.5)  |         |
| Winter                                          | 280 (24.0)            | 205 (23.6)  | 75 (24.8)  |         |
| Weekday                                         | 811 (69.4)            | 599 (69.1)  | 212 (70.2) | 0.72    |
| Time of trauma                                  |                       |             |            | 0.83    |
| 6A-MD                                           | 281 (24.0)            | 206 (23.8)  | 75 (24.8)  |         |
| MD-6P                                           | 266 (22.8)            | 203 (23.4)  | 63 (20.9)  |         |
| 6P-MN                                           | 361 (30.9)            | 265 (30.6)  | 96 (31.8)  |         |
| MN-6A                                           | 261 (22.3)            | 193 (22.3)  | 68 (22.5)  |         |
| Mechanism of Trauma                             |                       |             |            | 0.60    |
| Traffic accident                                | 500 (42.8)            | 375 (43.3)  | 125 (41.4) |         |
| Slip down                                       | 325 (27.8)            | 232 (26.8)  | 93 (30.8)  |         |
| Fall down                                       | 171 (14.6)            | 129 (14.9)  | 42 (13.9)  |         |
| Others                                          | 173 (14.8)            | 131 (15.1)  | 42 (13.9)  |         |
| Chief complaint                                 |                       |             |            |         |
| Altered mentality                               | 279 (23.9)            | 223 (25.7)  | 56 (18.5)  | 0.01    |
| Fracture/Abrasion/Laceration                    | 302 (25.8)            | 204 (23.5)  | 98 (32.5)  | <0.01   |
| Chest/Abdominal pain                            | 47 (4.0)              | 31 (3.6)    | 16 (5.3)   | 0.19    |
| Dyspnea                                         | 25 (2.1)              | 20 (2.3)    | 5 (1.7)    | 0.50    |

|    |                                      |            |                |             |       |
|----|--------------------------------------|------------|----------------|-------------|-------|
| 1  |                                      |            |                |             |       |
| 2  |                                      |            |                |             |       |
| 3  |                                      |            |                |             |       |
| 4  |                                      |            |                |             |       |
| 5  | Epistaxis                            | 44 (3.8)   | 30 (3.5)       | 14 (4.6)    | 0.36  |
| 6  | Headache/Paralysis/Dizziness/Vertigo | 95 (8.1)   | 64 (7.4)       | 31 (10.3)   | 0.11  |
| 7  | Nausea/Vomiting                      | 32 (2.7)   | 20 (2.3)       | 12 (4.0)    | 0.13  |
| 8  | EMS Vital sign assessment            |            |                |             |       |
| 9  |                                      | 130 (109-  |                | 131 (115-   |       |
| 10 | SBP, mmHg                            | 150)       | 130 (104-146)  | 150)        | <0.01 |
| 11 | Missing                              | 65 (5.6)   | 56 (6.5)       | 9 (3.0)     | 0.02  |
| 12 | DBP, mmHg                            | 80 (70-91) | 80 (69-90)     | 80 (70-92)  | <0.01 |
| 13 | Missing                              | 75 (6.4)   | 65 (7.5)       | 10 (3.3)    | 0.01  |
| 14 | HR, /min                             | 86 (75-99) | 86 (74-99)     | 86 (76-100) | <0.01 |
| 15 | Missing                              | 31 (2.7)   | 28 (3.2)       | 3 (1.0)     | 0.04  |
| 16 | RR, /min                             | 18 (16-20) | 18 (16-20)     | 18 (16-20)  | <0.01 |
| 17 | Missing                              | 36 (3.1)   | 33 (3.8)       | 3 (1.0)     | 0.01  |
| 18 | SpO2, %                              | 98 (95-99) | 98 (95-99)     | 98 (96-99)  | <0.01 |
| 19 | Missing                              | 38 (3.3)   | 33 (3.8)       | 5 (1.7)     | 0.07  |
| 20 | Temperature, °C                      | 36.5 (36-  |                | 36.5 (36-   |       |
| 21 |                                      | 36.8)      | 36.5 (36-36.8) | 36.7)       | <0.01 |
| 22 | Missing                              | 94 (8.0)   | 65 (7.5)       | 29 (9.6)    | 0.25  |
| 23 | AVPU scale                           |            |                |             | <0.01 |
| 24 | Alert                                | 714 (61.1) | 504 (58.1)     | 210 (69.5)  |       |
| 25 | Verbal                               | 168 (14.4) | 136 (15.7)     | 32 (10.6)   |       |
| 26 | Pain                                 | 199 (17.0) | 158 (18.2)     | 41 (13.6)   |       |
| 27 | Unresponsive                         | 88 (7.5)   | 69 (8.0)       | 19 (6.3)    |       |
| 28 | Abnormal light reflex                | 165 (14.1) | 132 (15.2)     | 33 (10.9)   | <0.01 |
| 29 | Missing                              | 66 (5.6)   | 57 (6.6)       | 9 (3.0)     |       |
| 30 | GCS scale component                  |            |                |             |       |
| 31 | Glasgow coma scale eye               |            |                |             | <0.01 |
| 32 | 4                                    | 558 (47.7) | 380 (43.8)     | 178 (58.9)  |       |
| 33 | 3                                    | 128 (10.9) | 109 (12.6)     | 19 (6.3)    |       |
| 34 | 2                                    | 110 (9.4)  | 82 (9.5)       | 28 (9.3)    |       |
| 35 | 1                                    | 174 (14.9) | 141 (16.3)     | 33 (10.9)   |       |
| 36 | Unknown                              | 199 (17.0) | 155 (17.9)     | 44 (14.6)   |       |
| 37 | Glasgow coma scale Verbal            |            |                |             | 0.01  |
| 38 | 5                                    | 520 (44.5) | 359 (41.4)     | 161 (53.3)  |       |
| 39 | 4                                    | 118 (10.1) | 88 (10.1)      | 30 (9.9)    |       |
| 40 | 3                                    | 25 (2.1)   | 19 (2.2)       | 6 (2.0)     |       |
| 41 | 2                                    | 132 (11.3) | 105 (12.1)     | 27 (8.9)    |       |
| 42 | 1                                    | 174 (14.9) | 141 (16.3)     | 33 (10.9)   |       |
| 43 | Unknown                              | 200 (17.1) | 155 (17.9)     | 45 (14.9)   |       |
| 44 | Glasgow coma scale Motor             |            |                |             | <0.01 |
| 45 | 6                                    | 499 (42.7) | 333 (38.4)     | 166 (55.0)  |       |
| 46 | 5                                    | 124 (10.6) | 103 (11.9)     | 21 (7.0)    |       |
| 47 | 4                                    | 158 (13.5) | 123 (14.2)     | 35 (11.6)   |       |
| 48 | 3                                    | 47 (4.0)   | 39 (4.5)       | 8 (2.6)     |       |
| 49 | 2                                    | 17 (1.5)   | 15 (1.7)       | 2 (0.7)     |       |
| 50 | 1                                    | 125 (10.7) | 99 (11.4)      | 26 (8.6)    |       |
| 51 | Unknown                              | 199 (17.0) | 155 (17.9)     | 44 (14.6)   |       |
| 52 |                                      |            |                |             |       |
| 53 |                                      |            |                |             |       |
| 54 |                                      |            |                |             |       |
| 55 |                                      |            |                |             |       |
| 56 |                                      |            |                |             |       |
| 57 |                                      |            |                |             |       |
| 58 |                                      |            |                |             |       |
| 59 |                                      |            |                |             |       |
| 60 |                                      |            |                |             |       |

|    |                                         |            |            |            |       |
|----|-----------------------------------------|------------|------------|------------|-------|
| 1  |                                         |            |            |            |       |
| 2  |                                         |            |            |            |       |
| 3  |                                         |            |            |            |       |
| 4  |                                         |            |            |            |       |
| 5  | EMS management                          |            |            |            |       |
| 6  | Intravenous route                       | 176 (15.1) | 129 (14.9) | 47 (15.6)  | 0.77  |
| 7  | Hemorrhage control                      | 586 (50.1) | 426 (49.1) | 160 (53.0) | 0.25  |
| 8  | Spinal motion restriction               | 811 (69.4) | 606 (69.9) | 205 (67.9) | 0.51  |
| 9  | Advanced airway management              | 4 (0.3)    | 2 (0.2)    | 2 (0.7)    | 0.28  |
| 10 | Oxygen supply                           | 233 (19.9) | 176 (20.3) | 57 (18.9)  | 0.59  |
| 11 |                                         |            |            |            |       |
| 12 | Field triage decision scheme criteria   |            |            |            |       |
| 13 | Physiological criteria                  |            |            |            |       |
| 14 | SBP<90 mmHg                             | 58 (5.0)   | 42 (4.8)   | 16 (5.3)   | 0.75  |
| 15 | RR<10 or >29 /min                       | 11 (0.9)   | 11 (1.3)   | 0 (0.0)    | 0.08  |
| 16 | Non-Alert                               | 429 (36.7) | 343 (39.6) | 86 (28.5)  | <0.01 |
| 17 |                                         |            |            |            |       |
| 18 | Anatomic criteria                       |            |            |            |       |
| 19 | All penetrating injuries to head, neck, |            |            |            |       |
| 20 | torso and extremities proximal to elbow |            |            |            |       |
| 21 | or knee                                 | 34 (2.9)   | 23 (2.7)   | 11 (3.6)   | 0.38  |
| 22 | Chest wall instability or deformity     | 4 (0.3)    | 4 (0.5)    | 0 (0.0)    | 0.58  |
| 23 | Two or more proximal long bone          |            |            |            |       |
| 24 | fractures                               | 19 (1.6)   | 13 (1.5)   | 6 (2.0)    | 0.60  |
| 25 | Crush, degloved, mangled or             |            |            |            |       |
| 26 | pulseless extremity                     | 15 (1.3)   | 13 (1.5)   | 2 (0.7)    | 0.38  |
| 27 | Amputation proximal to wrist or ankle   | 9 (0.8)    | 9 (1.0)    | 0 (0.0)    | 0.12  |
| 28 | Pelvic fractures                        | 8 (0.7)    | 6 (0.7)    | 2 (0.7)    | >0.95 |
| 29 | Open or depressed skull fracture        | 17 (1.5)   | 9 (1.0)    | 8 (2.6)    | 0.05  |
| 30 | Paralysis                               | 21 (1.8)   | 11 (1.3)   | 10 (3.3)   | 0.02  |
| 31 |                                         |            |            |            |       |
| 32 | Mechanism of injury criteria            |            |            |            |       |
| 33 | Fall > 6 meter                          | 113 (9.7)  | 84 (9.7)   | 29 (9.6)   | >0.95 |
| 34 |                                         |            |            |            |       |
| 35 | High-risk auto crash                    | 96 (8.2)   | 73 (8.4)   | 23 (7.6)   | 0.66  |
| 36 | Auto vs pedestrian/bicyclist thrown,    |            |            |            |       |
| 37 | run over, or with significant (>30km/h) |            |            |            |       |
| 38 | impact                                  | 119 (10.2) | 83 (9.6)   | 36 (11.9)  | 0.25  |
| 39 | Motorcycle crash > 30 km/hour           | 105 (9.0)  | 70 (8.1)   | 35 (11.6)  | 0.07  |
| 40 |                                         |            |            |            |       |
| 41 | ED disposition                          |            |            |            | 0.11  |
| 42 | Discharge                               | 320 (27.4) | 241 (27.8) | 79 (26.2)  |       |
| 43 | Transfer                                | 444 (38.0) | 316 (36.4) | 128 (42.4) |       |
| 44 | Admitted                                | 366 (31.3) | 276 (31.8) | 90 (29.8)  |       |
| 45 |                                         |            |            |            |       |
| 46 | In-hospital mortality                   | 90 (7.7)   | 74 (8.5)   | 16 (5.3)   | 0.07  |
| 47 |                                         |            |            |            |       |
| 48 | Outcomes                                |            |            |            |       |
| 49 | TBI                                     | 281 (24.0) | 215 (24.8) | 66 (21.9)  | 0.30  |
| 50 | TBI with intracranial injury            | 251 (21.5) | 195 (22.5) | 56 (18.5)  | 0.15  |
| 51 | TBI-related non-discharge               | 249 (21.3) | 192 (22.1) | 57 (18.9)  | 0.23  |
| 52 |                                         |            |            |            |       |
| 53 | TBI-related death                       | 43 (3.7)   | 32 (3.7)   | 11 (3.6)   | >0.95 |

IQR, interquartile range; SBP, systolic blood pressure; RR, respiratory rate; ED, emergency department; TBI,

traumatic brain injury.

Supplementary Figure 1. Receiver operating characteristics of prediction models according to outcomes. TBI, traumatic brain injury; TBI-I, TBI with intracranial hemorrhage or injury; TBI-ND, TBI non-discharge; TBI-D, TBI with death.

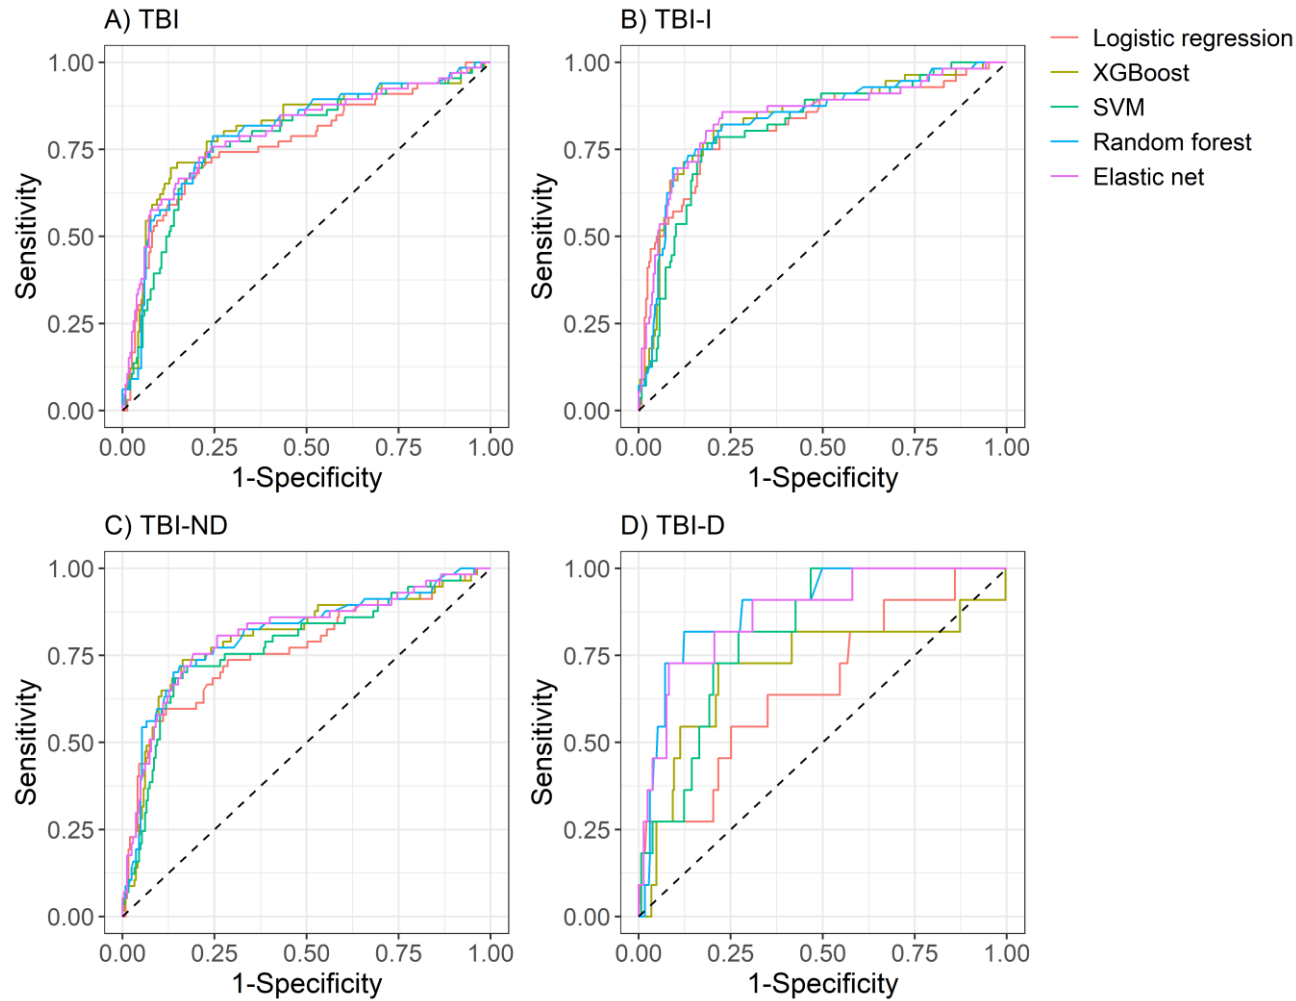

Supplementary Figure 2. Precision-recall curve of prediction models according to outcomes. TBI, traumatic brain injury; TBI-I, TBI with intracranial hemorrhage or injury; TBI-ND, TBI non-discharge; TBI-D, TBI with death; LR, logistic regression analysis; XGB, extreme gradient boosting; RF, random forest, EN, elastic net.

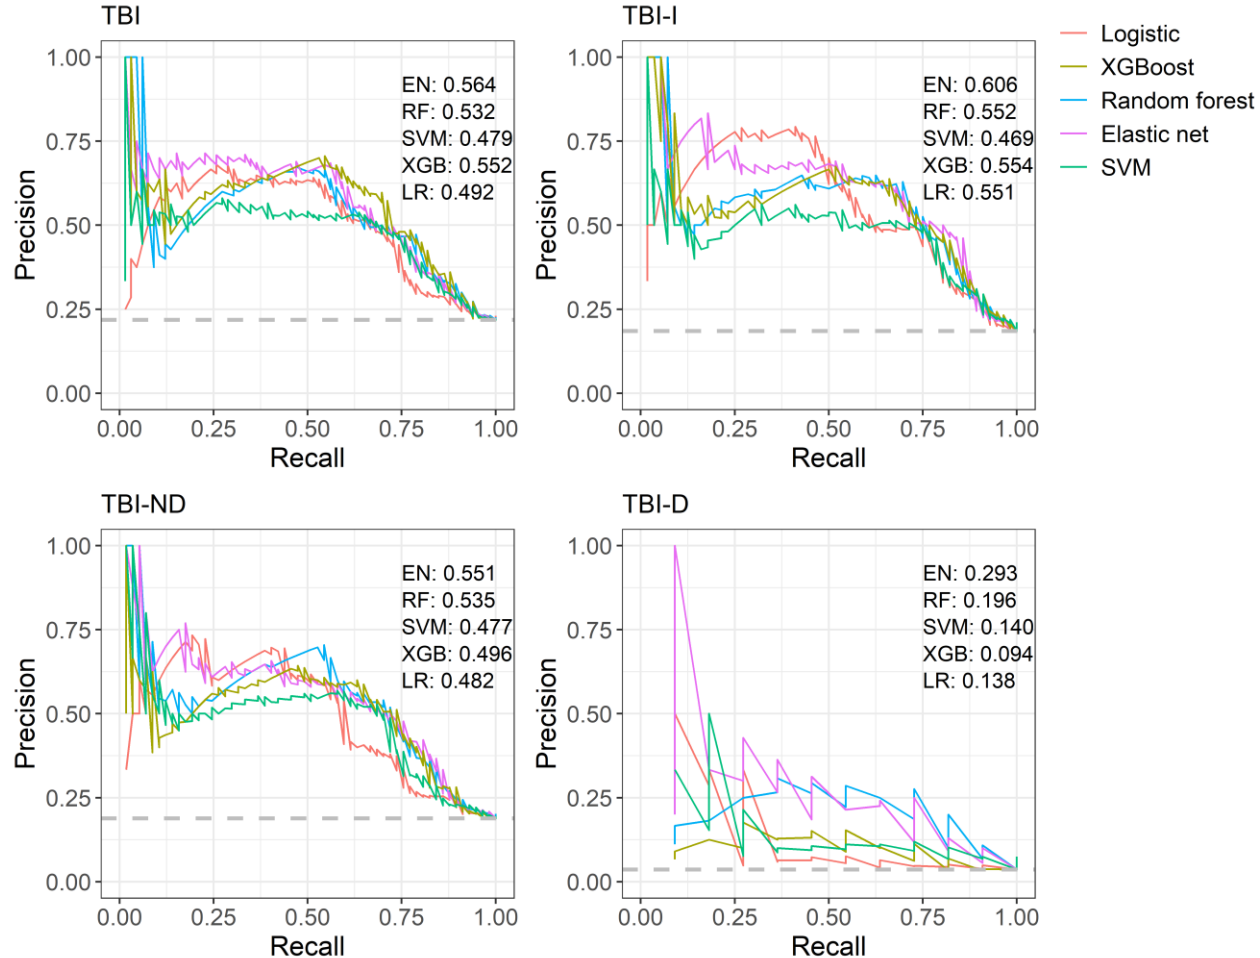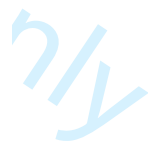

1  
2  
3  
4  
5  
6  
7  
8  
9  
10  
11  
12  
13  
14  
15  
16  
17  
18  
19  
20  
21  
22  
23  
24  
25  
26  
27  
28  
29  
30  
31  
32  
33  
34  
35  
36  
37  
38  
39  
40  
41  
42  
43  
44  
45  
46

Supplementary Figure 3. Calibration plot of prediction models according to outcomes. TBI, traumatic brain injury; TBI-I, TBI with intracranial hemorrhage or injury; TBI-ND, TBI non-discharge; TBI-D, TBI with death; p, p-value of Hosmer-Lemeshow test; BS, scaled Brier score.

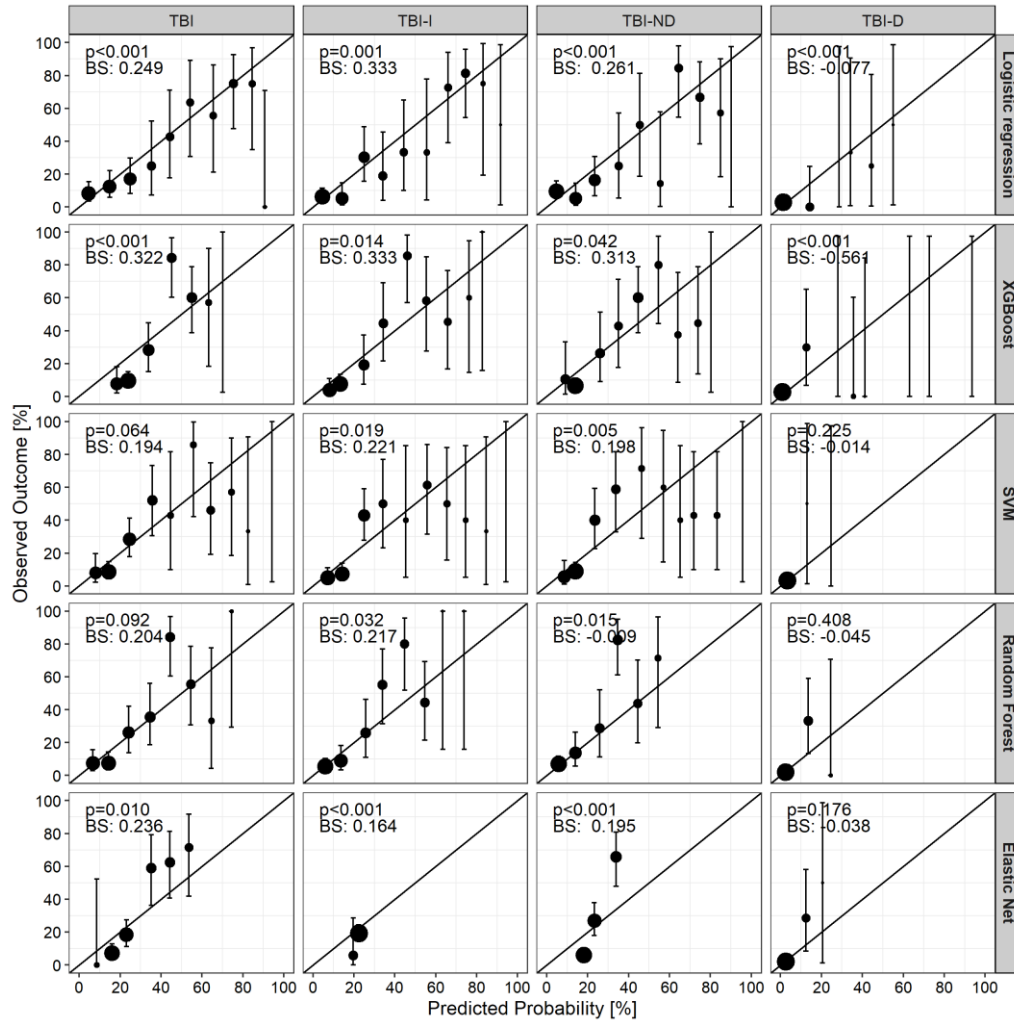

## TRIPOD Checklist: Prediction Model Development and Validation

| Section/Topic                | Item | Checklist Item | Page                                                                                                                                                                                                  |       |
|------------------------------|------|----------------|-------------------------------------------------------------------------------------------------------------------------------------------------------------------------------------------------------|-------|
| <b>Title and abstract</b>    |      |                |                                                                                                                                                                                                       |       |
| Title                        | 1    | D;V            | Identify the study as developing and/or validating a multivariable prediction model, the target population, and the outcome to be predicted.                                                          | 1     |
| Abstract                     | 2    | D;V            | Provide a summary of objectives, study design, setting, participants, sample size, predictors, outcome, statistical analysis, results, and conclusions.                                               | 4     |
| <b>Introduction</b>          |      |                |                                                                                                                                                                                                       |       |
| Background and objectives    | 3a   | D;V            | Explain the medical context (including whether diagnostic or prognostic) and rationale for developing or validating the multivariable prediction model, including references to existing models.      | 7     |
|                              | 3b   | D;V            | Specify the objectives, including whether the study describes the development or validation of the model or both.                                                                                     | 8     |
| <b>Methods</b>               |      |                |                                                                                                                                                                                                       |       |
| Source of data               | 4a   | D;V            | Describe the study design or source of data (e.g., randomized trial, cohort, or registry data), separately for the development and validation data sets, if applicable.                               | 8-9   |
|                              | 4b   | D;V            | Specify the key study dates, including start of accrual; end of accrual; and, if applicable, end of follow-up.                                                                                        | 9     |
| Participants                 | 5a   | D;V            | Specify key elements of the study setting (e.g., primary care, secondary care, general population) including number and location of centres.                                                          | 8-9   |
|                              | 5b   | D;V            | Describe eligibility criteria for participants.                                                                                                                                                       | 10    |
|                              | 5c   | D;V            | Give details of treatments received, if relevant.                                                                                                                                                     | N/A   |
| Outcome                      | 6a   | D;V            | Clearly define the outcome that is predicted by the prediction model, including how and when assessed.                                                                                                | 10-11 |
|                              | 6b   | D;V            | Report any actions to blind assessment of the outcome to be predicted.                                                                                                                                | N/A   |
| Predictors                   | 7a   | D;V            | Clearly define all predictors used in developing or validating the multivariable prediction model, including how and when they were measured.                                                         | 11    |
|                              | 7b   | D;V            | Report any actions to blind assessment of predictors for the outcome and other predictors.                                                                                                            | N/A   |
| Sample size                  | 8    | D;V            | Explain how the study size was arrived at.                                                                                                                                                            | 14    |
| Missing data                 | 9    | D;V            | Describe how missing data were handled (e.g., complete-case analysis, single imputation, multiple imputation) with details of any imputation method.                                                  | 11    |
| Statistical analysis methods | 10a  | D              | Describe how predictors were handled in the analyses.                                                                                                                                                 | 11    |
|                              | 10b  | D              | Specify type of model, all model-building procedures (including any predictor selection), and method for internal validation.                                                                         | 11-12 |
|                              | 10c  | V              | For validation, describe how the predictions were calculated.                                                                                                                                         | 12-13 |
|                              | 10d  | D;V            | Specify all measures used to assess model performance and, if relevant, to compare multiple models.                                                                                                   | 12-13 |
|                              | 10e  | V              | Describe any model updating (e.g., recalibration) arising from the validation, if done.                                                                                                               | N/A   |
| Risk groups                  | 11   | D;V            | Provide details on how risk groups were created, if done.                                                                                                                                             | N/A   |
| Development vs. validation   | 12   | V              | For validation, identify any differences from the development data in setting, eligibility criteria, outcome, and predictors.                                                                         | 12    |
| <b>Results</b>               |      |                |                                                                                                                                                                                                       |       |
| Participants                 | 13a  | D;V            | Describe the flow of participants through the study, including the number of participants with and without the outcome and, if applicable, a summary of the follow-up time. A diagram may be helpful. | 14    |
|                              | 13b  | D;V            | Describe the characteristics of the participants (basic demographics, clinical features, available predictors), including the number of participants with missing data for predictors and outcome.    | 14    |
|                              | 13c  | V              | For validation, show a comparison with the development data of the distribution of important variables (demographics, predictors and outcome).                                                        | 14    |
| Model development            | 14a  | D              | Specify the number of participants and outcome events in each analysis.                                                                                                                               | 14    |
|                              | 14b  | D              | If done, report the unadjusted association between each candidate predictor and outcome.                                                                                                              | N/A   |
| Model specification          | 15a  | D              | Present the full prediction model to allow predictions for individuals (i.e., all regression coefficients, and model intercept or baseline survival at a given time point).                           | N/A   |
|                              | 15b  | D              | Explain how to use the prediction model.                                                                                                                                                              | 14-15 |
| Model performance            | 16   | D;V            | Report performance measures (with CIs) for the prediction model.                                                                                                                                      | 14-15 |
| Model-updating               | 17   | V              | If done, report the results from any model updating (i.e., model specification, model performance).                                                                                                   | N/A   |
| <b>Discussion</b>            |      |                |                                                                                                                                                                                                       |       |
| Limitations                  | 18   | D;V            | Discuss any limitations of the study (such as nonrepresentative sample, few events per predictor, missing data).                                                                                      | 19    |
| Interpretation               | 19a  | V              | For validation, discuss the results with reference to performance in the development data, and any other validation data.                                                                             | 16-17 |
|                              | 19b  | D;V            | Give an overall interpretation of the results, considering objectives, limitations, results from similar studies, and other relevant evidence.                                                        | 16    |
| Implications                 | 20   | D;V            | Discuss the potential clinical use of the model and implications for future research.                                                                                                                 |       |
| <b>Other information</b>     |      |                |                                                                                                                                                                                                       |       |
| Supplementary information    | 21   | D;V            | Provide information about the availability of supplementary resources, such as study protocol, Web calculator, and data sets.                                                                         | Suppl |
| Funding                      | 22   | D;V            | Give the source of funding and the role of the funders for the present study.                                                                                                                         | 20    |

\*Items relevant only to the development of a prediction model are denoted by D, items relating solely to a validation of a prediction model are denoted by V, and items relating to both are denoted D;V. We recommend using the TRIPOD Checklist in conjunction with the TRIPOD Explanation and Elaboration document.

# BMJ Open

## Development and validation of a prehospital-stage prediction tool for traumatic brain injury: a multicentre retrospective cohort study in Korea

|                                 |                                                                                                                                                                                                                                                                                                                                                                                                                                                                                                                                                                                                                                                                                                                                                                                                                                                                                                                                                                                                                                                                                                                                                                   |
|---------------------------------|-------------------------------------------------------------------------------------------------------------------------------------------------------------------------------------------------------------------------------------------------------------------------------------------------------------------------------------------------------------------------------------------------------------------------------------------------------------------------------------------------------------------------------------------------------------------------------------------------------------------------------------------------------------------------------------------------------------------------------------------------------------------------------------------------------------------------------------------------------------------------------------------------------------------------------------------------------------------------------------------------------------------------------------------------------------------------------------------------------------------------------------------------------------------|
| Journal:                        | <i>BMJ Open</i>                                                                                                                                                                                                                                                                                                                                                                                                                                                                                                                                                                                                                                                                                                                                                                                                                                                                                                                                                                                                                                                                                                                                                   |
| Manuscript ID                   | bmjopen-2021-055918.R1                                                                                                                                                                                                                                                                                                                                                                                                                                                                                                                                                                                                                                                                                                                                                                                                                                                                                                                                                                                                                                                                                                                                            |
| Article Type:                   | Original research                                                                                                                                                                                                                                                                                                                                                                                                                                                                                                                                                                                                                                                                                                                                                                                                                                                                                                                                                                                                                                                                                                                                                 |
| Date Submitted by the Author:   | 25-Oct-2021                                                                                                                                                                                                                                                                                                                                                                                                                                                                                                                                                                                                                                                                                                                                                                                                                                                                                                                                                                                                                                                                                                                                                       |
| Complete List of Authors:       | Choi, Yeong Ho; Seoul National University Hospital, Emergency Department; Seoul National University Hospital Biomedical Research Institute, Laboratory of Emergency Medical Services<br>Park, Jeong Ho; Seoul National University Hospital, Emergency Department; Seoul National University Hospital Biomedical Research Institute, Laboratory of Emergency Medical Services<br>Hong, Ki Jeong; Seoul National University Hospital, Emergency Medicine; Seoul National University Hospital Biomedical Research Institute, Laboratory of Emergency Medical Services<br>Ro, Young Sun; Seoul National University Hospital, Emergency Medicine; Seoul National University Hospital Biomedical Research Institute, Laboratory of Emergency Medical Services<br>Song, Kyoung Jun; Seoul Metropolitan Boramae Hospital, Department of Emergency Medicine; Seoul National University Hospital Biomedical Research Institute, Laboratory of Emergency Medical Services<br>Shin, Sang Do; Seoul National University Hospital, Department of Emergency Medicine; Seoul National University Hospital Biomedical Research Institute, Laboratory of Emergency Medical Services |
| <b>Primary Subject Heading</b>: | Emergency medicine                                                                                                                                                                                                                                                                                                                                                                                                                                                                                                                                                                                                                                                                                                                                                                                                                                                                                                                                                                                                                                                                                                                                                |
| Secondary Subject Heading:      | Emergency medicine, Health informatics                                                                                                                                                                                                                                                                                                                                                                                                                                                                                                                                                                                                                                                                                                                                                                                                                                                                                                                                                                                                                                                                                                                            |
| Keywords:                       | ACCIDENT & EMERGENCY MEDICINE, Neurological injury < NEUROLOGY, Trauma management < ORTHOPAEDIC & TRAUMA SURGERY                                                                                                                                                                                                                                                                                                                                                                                                                                                                                                                                                                                                                                                                                                                                                                                                                                                                                                                                                                                                                                                  |
|                                 |                                                                                                                                                                                                                                                                                                                                                                                                                                                                                                                                                                                                                                                                                                                                                                                                                                                                                                                                                                                                                                                                                                                                                                   |

SCHOLARONE™  
Manuscripts





I, the Submitting Author has the right to grant and does grant on behalf of all authors of the Work (as defined in the below author licence), an exclusive licence and/or a non-exclusive licence for contributions from authors who are: i) UK Crown employees; ii) where BMJ has agreed a CC-BY licence shall apply, and/or iii) in accordance with the terms applicable for US Federal Government officers or employees acting as part of their official duties; on a worldwide, perpetual, irrevocable, royalty-free basis to BMJ Publishing Group Ltd ("BMJ") its licensees and where the relevant Journal is co-owned by BMJ to the co-owners of the Journal, to publish the Work in this journal and any other BMJ products and to exploit all rights, as set out in our [licence](#).

The Submitting Author accepts and understands that any supply made under these terms is made by BMJ to the Submitting Author unless you are acting as an employee on behalf of your employer or a postgraduate student of an affiliated institution which is paying any applicable article publishing charge ("APC") for Open Access articles. Where the Submitting Author wishes to make the Work available on an Open Access basis (and intends to pay the relevant APC), the terms of reuse of such Open Access shall be governed by a Creative Commons licence – details of these licences and which [Creative Commons](#) licence will apply to this Work are set out in our licence referred to above.

Other than as permitted in any relevant BMJ Author's Self Archiving Policies, I confirm this Work has not been accepted for publication elsewhere, is not being considered for publication elsewhere and does not duplicate material already published. I confirm all authors consent to publication of this Work and authorise the granting of this licence.

1  
2  
3  
4 1 **Title page**  
5  
6  
7 2  
8

9 3 **1. Title**

10  
11 4 Development and validation of a prehospital-stage prediction tool for traumatic brain  
12  
13 5 injury: a multicentre retrospective cohort study in Korea  
14  
15  
16 6

17  
18 7 **2. Authors**

19  
20 8 Yeong Ho Choi, MD

21  
22 9 Department of Emergency Medicine, Seoul National University College of Medicine and  
23  
24 10 Hospital, Seoul, Republic of Korea

25  
26 11 Laboratory of Emergency Medical Services, Seoul National University Hospital

27  
28 12 Biomedical Research Institute, Seoul, Korea

29  
30 13 E-mail: d2uk87@gmail.com  
31  
32  
33  
34 14

35  
36 15 Jeong Ho Park, MD

37  
38 16 Department of Emergency Medicine, Seoul National University College of Medicine and  
39  
40 17 Hospital, Seoul, Republic of Korea

41  
42 18 Laboratory of Emergency Medical Services, Seoul National University Hospital

43  
44 19 Biomedical Research Institute, Seoul, Korea

45  
46 20 E-mail: timthe@gmail.com  
47  
48  
49  
50 21

51  
52 22 Ki Jeong Hong, MD, PhD

53  
54 23 Department of Emergency Medicine, Seoul National University College of Medicine and  
55  
56 24 Hospital, Seoul, Republic of Korea  
57  
58  
59  
60

1  
2  
3  
4 25 Laboratory of Emergency Medical Services, Seoul National University Hospital  
5  
6 26 Biomedical Research Institute, Seoul, Korea  
7  
8  
9 27 E-mail: emkjhong@gmail.com  
10  
11 28  
12  
13 29 Young Sun Ro, MD, DrPH  
14  
15 30 Department of Emergency Medicine, Seoul National University College of Medicine and  
16  
17 31 Hospital, Seoul, Republic of Korea  
18  
19 32 Laboratory of Emergency Medical Services, Seoul National University Hospital  
20  
21 33 Biomedical Research Institute, Seoul, Korea  
22  
23 34 E-mail: ro.youngsun@gmail.com  
24  
25 35  
26  
27 36 Kyoung Jun Song, MD, PhD  
28  
29 37 Department of Emergency Medicine, Seoul Metropolitan Government Seoul National  
30  
31 38 University Boramae Medical Center, Seoul, Republic of Korea  
32  
33 39 Laboratory of Emergency Medical Services, Seoul National University Hospital  
34  
35 40 Biomedical Research Institute, Seoul, Korea  
36  
37 41 E-mail: skciva@gmail.com  
38  
39 42  
40  
41 43 Sang Do Shin, MD, PhD  
42  
43 44 Department of Emergency Medicine, Seoul National University College of Medicine and  
44  
45 45 Hospital, Seoul, Republic of Korea  
46  
47 46 Laboratory of Emergency Medical Services, Seoul National University Hospital  
48  
49 47 Biomedical Research Institute, Seoul, Korea  
50  
51 48 E-mail: shinsangdo@gmail.com  
52  
53  
54  
55  
56  
57  
58  
59  
60

1  
2  
3  
4 495  
6 50 **3. Address correspondence and requests for reprints: Jeong Ho Park, MD**7  
8  
9 51 Address: Seoul National University Hospital, 101 Daehak-Ro, Jongno-Gu, Seoul 03080,10  
11 52 Korea12  
13 53 Phone: +82-2-2072-180014  
15 54 FAX: +82-2-741-785516  
17 55 E-mail: timthe@gmail.com18  
19  
20 5621  
22  
23 5724  
25 58  
26  
27  
28  
29  
30  
31  
32  
33  
34  
35  
36  
37  
38  
39  
40  
41  
42  
43  
44  
45  
46  
47  
48  
49  
50  
51  
52  
53  
54  
55  
56  
57  
58  
59  
60

1  
2  
3  
4 59 **Abstract**

6 60 **Objectives:** Predicting diagnosis and prognosis of traumatic brain injury (TBI) at the  
7  
8  
9 61 prehospital stage is challenging; however, using comprehensive prehospital information and  
10  
11 62 machine learning may improve the performance of the predictive model. We developed and  
12  
13 63 tested predictive models for TBI that use machine learning algorithms using information that  
14  
15  
16 64 can be obtained in the prehospital stage.

17  
18 65 **Design:** This was a multi-center retrospective study.

19  
20 66 **Setting and participants:** This study was conducted at three tertiary academic emergency  
21  
22 67 departments (EDs) located in an urban area of South Korea. The data from adult patients with  
23  
24 68 severe trauma who were assessed by emergency medical service (EMS) providers and  
25  
26  
27 69 transported to three participating hospitals between 2014 to 2018 were analyzed.

28  
29 70 **Results:** We developed and tested five machine learning algorithms—logistic regression  
30  
31 71 analyses, extreme gradient boosting, support vector machine, random forest, and elastic net  
32  
33 72 (EN)—to predict TBI, TBI with intracranial hemorrhage or injury (TBI-I), TBI with  
34  
35 73 emergency department or admission result of admission or transferred (TBI-ND), and TBI  
36  
37 74 with emergency department or admission result of death (TBI-D). Of the 1,169 patients in the  
38  
39 75 development cohort, TBI, TBI-I, TBI-ND, and TBI-D was 24.0%, 21.5%, 21.3%, and 3.7%,  
40  
41 76 respectively. The EN model yielded an AUROC of 0.799 for TBI, 0.844 for TBI-I, 0.811 for  
42  
43 77 TBI-ND, and 0.871 for TBI-D. The EN model also yielded the highest specificity, and  
44  
45  
46 78 significant reclassification improvement. Variables related to loss of consciousness, Glasgow  
47  
48 79 Coma Scale, and light reflex were the three most important variables to predict all outcomes.

49  
50 80 **Conclusion:** Our results inform the diagnosis and prognosis of TBI. Machine learning  
51  
52 81 models resulted in significant performance improvement over that with logistic regression  
53  
54  
55 82 analyses, and the best performing model was EN.  
56  
57  
58  
59  
60

1  
2  
3  
4  
5  
6  
7  
8  
9  
10  
11  
12  
13  
14  
15  
16  
17  
18  
19  
20  
21  
22  
23  
24  
25  
26  
27  
28  
29  
30  
31  
32  
33  
34  
35  
36  
37  
38  
39  
40  
41  
42  
43  
44  
45  
46  
47  
48  
49  
50  
51  
52  
53  
54  
55  
56  
57  
58  
59  
60

83

84 **Keywords:** brain injuries; traumatic; outcome; prognosis; machine learning.

85

86

For peer review only

1  
2  
3  
4 87 **Strengths and limitations of this study**

5  
6 88 • This is an original research to develop and internally validate prehospital-stage prediction  
7  
8 89 models for traumatic brain injury using high dimensional prehospital information.

9  
10 90 • Machine learning models showed acceptable-to-excellent discrimination performance.

11  
12  
13 91 • The retrospective observational study design could lead to certain types of bias (eg,  
14  
15 92 selection bias, confounding bias).

16  
17 93 • External validation for other areas should be conducted to generalize the developed  
18  
19 94 prediction model.

20  
21  
22 95  
23  
24  
25  
26  
27  
28  
29  
30  
31  
32  
33  
34  
35  
36  
37  
38  
39  
40  
41  
42  
43  
44  
45  
46  
47  
48  
49  
50  
51  
52  
53  
54  
55  
56  
57  
58  
59  
60

## 96 **Introduction**

97 Traumatic brain injury (TBI) is a significant health burden worldwide.<sup>1</sup> It is the leading cause  
98 of mortality and disability among young individuals.<sup>2</sup> Patients with TBI are vulnerable to  
99 hypoxia and hypotension in the early period of their course and these insults are associated  
100 with poor outcomes.<sup>3 4</sup> Prehospital assessment and management of patients with TBI is  
101 important,<sup>5</sup> as early prediction of TBI and correcting hypoxia and hypotension during the  
102 prehospital stage could be beneficial.<sup>3</sup> However, the identification of TBI can often be  
103 challenging in the prehospital area.<sup>5</sup> Vulnerable patients, including the elderly or patients who  
104 take medications like anti-platelet or anticoagulant drugs, often have TBI owing to low  
105 energy insults.<sup>6</sup> Prehospital clinical signs are also reported to have poor sensitivity for raised  
106 intracranial pressure following TBI.<sup>7</sup>

107         Several prediction models to target patients with TBI have been reported.<sup>8-12</sup>  
108 However, most incorporated information that is available only in the hospital, such as  
109 laboratory results or image findings.<sup>8 9 13</sup> In addition, most previous prediction models  
110 focused on the outcomes of patients with TBI,<sup>14-16</sup> not the identification of TBI. Previously,  
111 predictors of older adult patients with TBI who required transport to a trauma center were  
112 identified. However, this was consensus-based; therefore, there is a lack of clinical data.<sup>17</sup>  
113 Accurate prehospital prediction of TBI and its severity could prevent delays to definite care  
114 for patients with TBI. Most emergency medical service (EMS) providers collect various  
115 information including demographics, past medical history, circumstances of the trauma, and  
116 clinical signs including vital signs; but those variables have not been evaluated together as  
117 predictors of TBI and its severity. Using a variety of prehospital information, and adapting  
118 newly emerging machine learning algorithms for predicting diagnosis, disposition, and  
119 outcome of TBI, might improve the accuracy of identification of TBI and its severity.



1  
2  
3  
4 120 The aim of this study was to develop and test prediction models for the diagnosis and  
5  
6 121 prognosis of TBI using prehospital information and machine learning algorithms among  
7  
8 122 patients with severe trauma. We hypothesized that incorporating prehospital information  
9  
10 123 could achieve acceptable performance in predicting TBI, and machine learning algorithms  
11  
12 124 could contribute to performance improvement.  
13  
14  
15  
16

## 17 125 **Materials and Methods**

### 18 19 20 126 *Study design and settings*

21  
22  
23 127 This was a multi-center retrospective study conducted at three tertiary academic emergency  
24  
25 128 departments (EDs) located in an urban area (Seoul and Bundang) of South Korea. These EDs  
26  
27 129 received 50,000–90,000 visits annually and are not designated trauma centers. We adhered to  
28  
29 130 the Transparent Reporting of a Multivariable Prediction Model for Individual Prognosis or  
30  
31 131 Diagnosis (TRIPOD) statement on reporting predictive models.<sup>18</sup>  
32  
33

34 132 The EMS system in South Korea is operated by the National Fire Agency. The EMS  
35  
36 133 level is considered intermediate, as EMS providers can perform bleeding control, spinal  
37  
38 134 motion restriction, immobilization and splintage, advanced airway management, and  
39  
40 135 administer fluid intravenously. As only physicians can declare death in South Korea, EMS  
41  
42 136 providers cannot stop resuscitation and must transport all patients including those in cardiac  
43  
44 137 arrest to the ED. For all EMS transport, EMS providers record an ambulance run-sheet by  
45  
46 138 law. Since 2012, the National Fire Agency adapted the United States Centers for Disease  
47  
48 139 Control and Prevention of the United States field triage decision scheme to evaluate patients  
49  
50 140 with trauma,<sup>19</sup> and they developed an EMS severe trauma in-depth registry. For said patients,  
51  
52 141 EMS providers evaluate whether patients met trauma center transport criteria in the field  
53  
54 142 triage decision scheme. If they did, the in-depth registry should be recorded, and EMS  
55  
56  
57  
58  
59  
60

1  
2  
3  
4 143 transport protocol recommends that patients are transferred to a near regional trauma center;  
5  
6 144 but it is not mandatory.  
7

8  
9 145 The Ministry of Health and Welfare designated three ED levels according to the  
10  
11 146 resources and functional requirements; level 1 (n = 36) and level 2 (n = 118) EDs have more  
12  
13 147 resources and better facilities for emergency care and must be staffed by emergency  
14  
15 148 physicians 24 hours a day/365 days a year; whereas level 3 EDs (n = 248) can be staffed by  
16  
17 149 general physicians. In accordance with the EMS Act, all EDs participated annually in a  
18  
19 150 nationwide functional performance evaluation program, which was administered by the  
20  
21 151 Ministry of Health and Welfare. The three participating hospitals in this study were all level 1  
22  
23 152 EDs that can perform acute trauma care for patients with TBI 24 hours a day/365 days a  
24  
25 153 year—including emergency neurosurgical operation and angiographic interventions. The  
26  
27 154 Ministry of Health and Welfare also designated trauma centers in Korea. Total 16 trauma  
28  
29 155 centers were designated as trauma centers in 2018. Among them, 15 were Level I EDs.  
30  
31  
32  
33  
34

### 35 156 ***Data source***

36  
37  
38 157 We used an EMS ambulance run-sheet, EMS trauma in-depth registry, and ED administrative  
39  
40 158 database. The EMS database information, including ambulance run-sheet and trauma in-depth  
41  
42 159 registry, was collected electronically by EMS providers using tablets. The EMS record  
43  
44 160 review for each severe trauma has been performed by EMS medical directors of each fire  
45  
46 161 department since 2012. The ED administrative database contains patients' demographic  
47  
48 162 characteristics, route of visit, time of visit, and diagnosis and disposition. We merged the  
49  
50 163 EMS database with the ED administrative database based on patients' arrival time, age, and  
51  
52 164 sex.  
53  
54  
55  
56  
57  
58  
59  
60

1  
2  
3  
4 165 ***Study population***  
5

6  
7 166 We included adult (age  $\geq 15$ ) EMS users who were transported to participating hospitals with  
8  
9 167 severe trauma from January 1, 2014 to December 31, 2018. Severe trauma was assessed by  
10  
11 168 EMS providers and defined as patients who fulfilled trauma center transport criteria  
12  
13  
14 169 (physiologic criteria, anatomic criteria, mechanism of injury criteria, or special patients or  
15  
16 170 system consideration criteria) in the field triage decision scheme.<sup>20</sup> Patients were excluded if  
17  
18 171 they had out-of-hospital cardiac arrest or their main cause of EMS call was medical or  
19  
20 172 nontraumatic injury including choking, drowning, fire, flame, heat, cold, poisoning, chemical,  
21  
22 173 sexual assault, weather, or natural disaster. Patients with an unknown outcome were also  
23  
24  
25 174 excluded.  
26  
27

28  
29 175 ***Outcome measure***  
30

31  
32 176 The primary outcome measure was the diagnosis of TBI. TBI diagnosis was defined as  
33  
34 177 patients whose diagnostic code, according to the International Statistical Classification of  
35  
36 178 Diseases and Related Health Problems (ICD-10), was between S06.0 and S06.9.<sup>21 22</sup>  
37  
38  
39 179 Although S06.7 is codes for the duration of unconscious, we included S06.7 in our study  
40  
41 180 outcome according to the previous studies.<sup>21-23</sup> However, no patients only have S06.7 code  
42  
43 181 for TBI diagnosis in our study. The ED administrative database has two types of primary  
44  
45 182 diagnostic codes: the final diagnostic codes at ED discharge and at hospital discharge. We  
46  
47 183 extracted up to 20 codes for each. We defined the diagnostic code as positive for TBI if a  
48  
49 184 confirmative diagnostic code was found in any level of the discharge record. Because ICD 10  
50  
51 185 code is not directly linked to the severity of TBI, we further included a variety of additional  
52  
53 186 outcome measures to perform analysis that take into account severity. A secondary outcome  
54  
55 187 measure was TBI diagnosis with intracranial hemorrhage or injury (TBI-I), defined as TBI  
56  
57  
58  
59  
60

1  
2  
3  
4 188 patients excluding concussion (ICD 10 code with S06.0). A tertiary outcome was TBI with  
5  
6 189 non-discharge (TBI-ND), defined as TBI patients excluding ED discharged patients. Because  
7  
8  
9 190 TBI-ND patients needed further management by hospitalization or transfer, we thought that  
10  
11 191 this group of patients had clinically significant severity. A quaternary outcome measure was  
12  
13 192 TBI with death (TBI-D), defined as TBI patients who died in ED or hospital. Because TBI-D  
14  
15  
16 193 patients are most severe group, TBI-D patients were also included in TBI-ND.

### 194 ***Variables and preprocessing***

195 We collected patients' demographic data, circumstances of trauma, chief complaints, EMS  
196 vital sign assessment, EMS management and hospital outcomes. The detailed descriptions of  
197 each variable are described in Supplementary Table 1. Categorical variables were  
198 preprocessed with the one-hot encoding (dummy variable encoding) method. Continuous  
199 variables were divided into four quantiles and unknown or missing values were categorized  
200 as a fifth category. One-hot encoding was also applied to discretized continuous variables.  
201 Preprocessing measures including discretization results of continuous variables are presented  
202 in Supplementary Table 1.

### 203 ***Model development***

204 We developed prediction models for outcomes by using five machine learning algorithms:  
205 traditional logistic regression analyses (LR), extreme gradient boost (XGB), random forest  
206 (RF), support vector machine (SVM), and elastic net (EN). The LR algorithm was chosen as  
207 baseline comparison algorithm because it is widely used in the medical field and has been  
208 used for previous prediction model development in TBI studies.<sup>12</sup> Backward stepwise LR was  
209 selected for feature selection, and we used the default parameter of stepAIC function from  
210 MASS package (version 7.3-53.1) in R for the selection. The other four algorithms were

1  
2  
3  
4 211 selected based on their ability to model nonlinear associations, their relative ease of  
5  
6 212 implementation, and their general acceptance in the machine learning community.<sup>24-26</sup> All  
7  
8  
9 213 algorithms have a method to calculate the probability of the outcome occurring and  
10  
11 214 algorithms other than LR need hyperparameter tuning for proper training and prediction.

12  
13 215 The study population was split into training cohorts that included development,  
14  
15 216 validation, and test cohorts. The development cohort included a training cohort from which  
16  
17 217 each of the machine learning prediction models were derived and a validation cohort in which  
18  
19 218 the prediction models were applied to adjust the hyperparameters of the algorithm. The test  
20  
21 219 cohort was used for the final evaluation of the performance of the prediction models.  
22  
23 220 Chronological split was used for data split. Patients enrolled from January 1, 2014 to  
24  
25 221 December 31, 2016 were used as the training cohort; patients from January 1, 2017 to  
26  
27 222 December 31, 2017 were used as the validation cohort; and patients from January 1, 2018 to  
28  
29 223 December 31, 2018 were used as the test cohort. Hyperparameter tuning using validation data  
30  
31 224 was conducted by, first, a random search within 10,000 randomly generated hyperparameters;  
32  
33 225 then, grid search hyperparameters chosen around from random search with five candidates  
34  
35 226 per each hyperparameter. Finally, hyperparameter with best area under receiver-operation  
36  
37 227 curve (AUROC) in validation cohorts were selected. Test data were separated during training  
38  
39 228 and tuning processes and used to measure algorithm performance.  
40  
41  
42  
43  
44  
45  
46

#### 47 229 ***Statistical analysis***

48  
49 230 The demographic findings and outcomes of the study population were described in this study.  
50  
51 231 Additionally, the baseline characteristics of the training cohort and the validation cohort were  
52  
53 232 compared. The continuous variables were compared by using Student's T-test or the  
54  
55 233 Wilcoxon rank sum test, and the categorical variables were compared by using the chi-  
56  
57 234 squared test or the Fisher exact test, as appropriate.  
58  
59  
60

1  
2  
3  
4 235 We assessed discrimination performance by comparing the AUROC for each model  
5  
6 236 in the test cohort. We considered an AUROC of 0.5 as no discrimination, 0.7 to 0.8 as  
7  
8  
9 237 acceptable, 0.8 to 0.9 as excellent, and more than 0.9 is considered outstanding.<sup>27</sup> Area under  
10  
11 238 the precision-recall curve (AUPRC) was assessed for each model in the test cohort. We  
12  
13 239 assessed the calibration power by using the Hosmer–Lemeshow test, the scaled Brier score,  
14  
15 240 and a calibration plot in the test cohort. For the delineation of test characteristics, the  
16  
17 241 sensitivity, specificity, and positive and negative predictive values with 95% CIs were  
18  
19  
20 242 determined using a cutoff probability at a sensitivity of 80%. Given that poor sensitivity of  
21  
22 243 clinical predictors for TBI in previous studies,<sup>7</sup> and almost 75% sensitivity level for other  
23  
24 244 severe disease prediction in prehospital settings,<sup>28 29</sup> we thought that 80% sensitivity was an  
25  
26 245 appropriate target for our prediction model. We calculated false positive rate as 1 –  
27  
28  
29 246 specificity. The added prognostic power of each prediction model compared to the LR model  
30  
31 247 was also evaluated by continuous net reclassification index (NRI). NRI is a statistical method  
32  
33 248 to quantify how well a new model correctly reclassifies the study population with the other  
34  
35 249 models. Details of NRI are described elsewhere.<sup>30</sup>

36  
37  
38  
39 250 By using a model-specific metric, the variable importance of each model was  
40  
41 251 assessed, except for the SVM algorithm. The variable importance was determined by the  
42  
43 252 coefficient effect sizes for the LR model. The XGB and RF models were ranked by variable  
44  
45 253 importance on the selection frequency of the variable as a decision node. The absolute value  
46  
47 254 of the coefficients corresponding to the tuned model were used for the measurement of  
48  
49 255 variable importance in the EN algorithm. To compare the variable importance of each  
50  
51 256 prediction models efficiently, top 5 variables of each model was presented.  
52  
53  
54  
55  
56  
57  
58  
59  
60

1  
2  
3  
4 257 All statistical analyses were performed with R Statistical Software (version 4.0.1; R  
5  
6 258 Foundation for Statistical Computing, Vienna, Austria). Packages included caret, e1071,  
7  
8  
9 259 xgboost, randomForest, and glmnet for the analysis of the machine learning algorithms.  
10  
11

### 12 260 *Patient and public involvement*

13  
14 261 This research was done without patient involvement. Patients were not invited to comment on  
15  
16  
17 262 the study design and were not consulted to develop patient relevant outcomes or interpret the  
18  
19 263 results. Patients were not invited to contribute to the writing or editing of this document for  
20  
21 264 readability or accuracy.  
22  
23

24 265

### 25 26 27 266 **Result**

#### 28 29 30 267 *Demographic findings*

31  
32  
33 268 Among the 157,134 EMS users transported to three hospitals from 2014 to 2018, 1,169  
34  
35 269 patients were included in the final analysis (Figure 1). Patients were split into 2 datasets: data  
36  
37  
38 270 from 2014 to 2017, consisting of 867 patients (74.2%) in the development cohort; and the  
39  
40 271 remaining data from 2018 consisting of 302 patients (25.8%) in the test cohort (Figure 1).  
41  
42 272 Among the development cohort, data from 2014 to 2016—consisting of 661 patients—were  
43  
44 273 used as the training cohort, and 2017 data—consisting of 206 patients—were used as the  
45  
46 274 validation cohort in the model.  
47  
48

49 275 Table 1 shows key demographic findings of the development and test cohorts. Median  
50  
51 276 (IQR) age was 52 years (35–66) in the development cohort and 56 years (40–69) in the test  
52  
53 277 cohort. Traffic accident was most common mechanism of trauma (43.3% for the development  
54  
55 278 cohort and 41.4% for the test cohort). The proportion of patients with alert mental status was  
56  
57  
58  
59  
60

1  
2  
3  
4 279 58.1% for the development cohort and 69.5% in the test cohort. Overall, TBI, TBI-I, TBI-  
5  
6 280 ND, TBI-D occurred in 215 (24.8%), 195 (22.5%), 192 (22.1%), and 32 (3.7%) in the  
7  
8 281 development cohort; and 66 (21.9%), 56 (18.5%), 57 (18.9%), and 11 (3.6%) in the test  
9  
10 282 cohort. All demographic characteristics of the development and test cohorts are described in  
11  
12 283 Supplementary Table 2.

### 17 284 *Main analysis*

18  
19  
20 285 The final hyperparameters of prediction models are described in Supplementary Table 3. The  
21  
22 286 discrimination and NRI of the prediction models on the test cohort are presented in Table 2.  
23  
24 287 The AUROC for outcomes were 0.770–0.806 for TBI, 0.820–0.844 for TBI-I, 0.767–0.811  
25  
26 288 for TBI-ND, and 0.664–0.889 for TBI-D (Table 2 and Supplementary Figure 1). Compared to  
27  
28 289 LR, XGB performed significantly well in predicting TBI, and RF and EN performed well in  
29  
30 290 predicting TBI-ND and TBI-D. EN model generally performed well on all outcomes. The  
31  
32 291 AUROC of the EN model for outcomes were 0.799 (95% CI: 0.732–0.867), 0.844 (95% CI:  
33  
34 292 0.779–0.910), 0.811 (95% CI: 0.741–0.882), and 0.871 (95% CI: 0.764–0.978) for TBI, TBI-  
35  
36 293 I, TBI-ND, and TBI-D, respectively. Machine learning models generally resulted in  
37  
38 294 significant reclassification improvement compared to LR for TBI, TBI-I, and TBI-ND. For  
39  
40 295 prediction TBI-D, AUROC difference, and reclassification improvement compared to LR  
41  
42 296 was non-significant in all machine learning models. The precision-recall curve is shown in  
43  
44 297 Supplementary Figure 2. AUPRC were 0.479–0.564 for TBI, 0.469–0.606 for TBI-I, 0.477–  
45  
46 298 0.551 for TBI-ND and 0.094–0.140 for TBI-D. EN model showed highest AUPRC among all  
47  
48 299 prediction models. Supplementary Figure 3 shows the calibration plot of prediction models  
49  
50 300 according to outcomes. All prediction models generally showed poor calibration. Given the  
51  
52 301 high AUROC and AUPRC among prediction models, and reclassification improvement  
53  
54  
55  
56  
57  
58  
59  
60



1  
2  
3  
4 302 compared to LR, we determined EN as a best-performing prediction model in our analysis.

5  
6 303 Using cutoff of 80% sensitivity, specificity was 47.5–68.2% for TBI, 71.1–81.3% for  
7  
8 304 TBI-I, 46.1–74.3% for TBI-ND, and 42.6–.0 for TBI-D. EN showed the highest specificity  
9  
10 305 and PPV among all outcomes. False positive rate (1 – specificity) was almost 19.7–39.0%  
11  
12 306 according to outcomes in the EN model. The 95% CI of specificity of the EN model was not  
13  
14 307 overlapped with LR in TBI, TBI-ND, and TBI-D predictions. NPV was almost 89–99% for  
15  
16 308 all outcomes in the prediction models (Table 3).

17  
18 309 Table 4 shows the top 5 variable importance of prediction models according to  
19  
20 310 outcomes. Variables related to patients' symptom of loss of consciousness, Glasgow Coma  
21  
22 311 Scale component, and light reflex were the three most important variables to predict all  
23  
24 312 outcomes. Compared to other outcomes, the difference between variable importance for TBI-  
25  
26 313 D was prominent, and the mechanism of injury, heart rate, and age showed the highest  
27  
28 314 importance for predicting TBI-D.

## 35 315 **Discussion**

36  
37 316 By using prehospital data from EMS users visiting three teaching hospitals, we developed  
38  
39 317 and validated prediction models for the diagnosis and prognosis of TBI using machine  
40  
41 318 learning algorithms among patients with severe trauma, identified by EMS providers in South  
42  
43 319 Korea. We found that 24% of patients were diagnosed with TBI, 22% showed intracranial  
44  
45 320 injury, 21% could not be discharged from the ED with a TBI diagnosis, and 4% showed TBI-  
46  
47 321 related death. Machine learning models showed acceptable-to-excellent discrimination  
48  
49 322 performance (AUROCs were 0.799–0.871 according to outcomes in the best-performing EN  
50  
51 323 model). When identifying 80% of target patients with TBI, the false positive rate was almost  
52  
53 324 19.7–39.0%. Consciousness status related variables ranging from patients' symptom to EMS  
54  
55  
56  
57  
58  
59  
60

1  
2  
3  
4 325 providers' assessment showed the highest importance for predicting all outcomes. This study  
5  
6 326 adds considerably to the understanding of prehospital prediction performance of TBI among  
7  
8  
9 327 patients with severe trauma. Use of comprehensive prehospital information and certain  
10  
11 328 machine learning approaches led to increased performance with a diminished false positive  
12  
13 329 rate compared to those of the traditional statistical model.

15  
16 330 Several studies reported that EMS providers' assessment using prehospital  
17  
18 331 information is effective for the identification of patients with severe trauma who require  
19  
20 332 direct transport to a trauma center.<sup>31-33</sup> Because TBI accounts for a significant portion of  
21  
22 333 patients with severe trauma,<sup>32</sup> and the majority of patients have poor access to trauma  
23  
24 334 centers,<sup>34</sup> identification of TBI among patients with severe trauma by EMS providers could  
25  
26 335 contribute to proper prehospital management and destination hospital decisions.<sup>3</sup> However,  
27  
28 336 prehospital identification of TBI is challenging.<sup>35</sup> Prehospital clinical signs showed poor  
29  
30 337 predictive performance for differentiating patients with TBI.<sup>7</sup>, and previous prediction  
31  
32 338 models related to TBI mostly focused on TBI outcomes.<sup>8 9 13</sup> One study reported the  
33  
34 339 predictors for mild TBI with persistent symptoms; but a single-center case-control study  
35  
36 340 design and ED-based model development lacks applicability to prehospital settings.<sup>36</sup> In this  
37  
38 341 study, we developed and tested TBI prediction models that used prehospital information, and  
39  
40 342 we found acceptable discrimination power for the prediction of diagnosis and prognosis of  
41  
42 343 TBI. Uniquely, we incorporated various demographic variables, trauma circumstances,  
43  
44 344 patients' complaints, and EMS assessment information in the prediction models, and we  
45  
46 345 adapted the machine learning algorithms.

47  
48 346 When using a cutoff for 80% sensitivity for TBI detection, the false positive rate was  
49  
50 347 19.7–39.0% (Table 2). Those false positive rate levels are plausible for detecting severe  
51  
52 348 diseases in EMS settings. A previous study reported a 26% of false positive rate of EMS  
53  
54  
55  
56  
57  
58  
59  
60

1  
2  
3  
4 349 triage for myocardial infarction with a sensitivity of 74% and 50% of false positive rate of  
5  
6 350 EMS recognition of stroke in sensitivity of 74%.<sup>28 29</sup> Considering the prevalence of outcomes  
7  
8 351 (24% in TBI, 22% in TBI-I, 21% in TBI-ND, and 4% in TBI-D; Table 1), there would be 16,  
9  
10 352 9, 12, and 67 false-positive patients for every 10 patients that are accurately identified as TBI,  
11  
12 353 TBI-I, TBI-ND, and TBI-D, respectively (Supplementary Table 4). Because of the low  
13  
14 354 prevalence of TBI-D, a similar specificity of the prediction model for outcomes resulted in a  
15  
16 355 very low positive predictive value and a high proportion of false positive cases, which  
17  
18 356 suggested the limited applicability of prediction models for TBI-D in prehospital settings.

19  
20 357       Consciousness-status-related variables ranging from patients' complaints to EMS  
21  
22 358 assessment showed the highest importance regardless of models and outcomes in our study.  
23  
24 359 Consciousness status is closely associated with head trauma. Head trauma can result in  
25  
26 360 structural brain injury or physiological disruption of brain function, which could result in  
27  
28 361 altered mental status.<sup>37</sup> Mental status is also associated with TBI severity,<sup>38</sup> and its  
29  
30 362 association with TBI outcomes have been reported.<sup>8 9 13</sup> History taking and physical  
31  
32 363 examination for altered mental status is key to early diagnosis and proper management of TBI  
33  
34 364 in prehospital settings.<sup>39</sup>

35  
36 365       We adapted machine learning algorithms for the prediction of TBI-related outcomes  
37  
38 366 and found an improvement in discrimination and an increase in specificity with the same  
39  
40 367 sensitivity thresholds. However, the LR model also showed acceptable or similar  
41  
42 368 performance compared to machine learning models, according to the outcomes. In clinical  
43  
44 369 prediction models, a previous systematic review reported no performance benefit of the  
45  
46 370 machine learning model over LR.<sup>40</sup> The previous study stated that machine learning models  
47  
48 371 tend to show high performance with a strong signal-to-noise ratio problem like gaming,  
49  
50 372 image recognition. However, clinical prediction problems often result in a poor signal-to-

1  
2  
3  
4 373 noise ratio.<sup>40</sup> If we could use unstructured data, which has strong signal-to-noise ratio like  
5  
6 374 continuous vital sign monitoring data or audiovisual data for patients' appearance, machine  
7  
8  
9 375 learning models might perform better than LR models. In addition, if we analyzed more  
10  
11 376 patient data, the performance improvement of machine models might be elucidated.

12  
13 377         Precise assessment in prehospital field could contribute to improved patient-related  
14  
15 378 outcomes. High demand of EMS call and response, disparity in accessibility to definitive care  
16  
17 379 capable hospitals according to regions,<sup>34</sup> and the importance of timely management in acute  
18  
19 380 disease care are the chief reasons behind the necessity for the accurate assessment of EMS  
20  
21 381 providers. Although information acquisition and processing is quite difficult in prehospital  
22  
23 382 areas, various instruments and information systems could attribute to diminish those  
24  
25 383 problems. Complex data acquisition like mobile CT or other unstructured data<sup>41</sup>, information  
26  
27 384 sharing through telemedicine,<sup>42</sup> and decision support tools in prehospital environments<sup>43</sup>  
28  
29 385 could contribute to the accurate assessment of EMS providers. More information acquisition  
30  
31 386 and real-time processing of those data could improve the clinical prediction models in  
32  
33 387 prehospital areas, which could lead to the improvement of patients' safety and outcomes.

34  
35 388         Our study had several limitations. First, our data were collected at three teaching  
36  
37 389 hospitals in urban areas of South Korea. Therefore, external validation for other areas should  
38  
39 390 be conducted to generalize the developed prediction model. Second, we used retrospective  
40  
41 391 analysis of electronically collected prehospital and hospital data. There might be various  
42  
43 392 information loss and missing data. We treated missing status as a separate category for our  
44  
45 393 analysis;<sup>44</sup> however, there could be different reasons for missing data. Third, there is a  
46  
47 394 possibility that the prediction model was overfitted or underfitted. The use of large number of  
48  
49 395 predictors also can contribute to overfitting. To minimize this issue, we rigorously searched  
50  
51 396 hyperparameters and carefully chose hyperparameters according to the performance in  
52  
53  
54  
55  
56  
57  
58  
59  
60

1  
2  
3  
4 397 independent validation cohorts. Fourth, we selected our study population using trauma center  
5  
6 398 transport criteria for EMS providers in Korea. Although those criteria are based on the field  
7  
8 399 triage decision scheme which is the most widely used prehospital trauma triage protocol,<sup>6</sup>  
9  
10 400 extrapolation to another EMS setting or general trauma patients would be limited. Fifth,  
11  
12 401 Abbreviated Injury Scale (AIS) codes were not used to identify our study outcome because of  
13  
14 402 a lack of information. To compensate for this limitation, we further identified TBI-I, TBI-  
15  
16 403 ND, and TBI-D patients to consider severity. However, different definitions of clinical  
17  
18 404 severity, including ICU admission or emergency operation, might be possible. Lastly, this  
19  
20 405 study was performed in an intermediate-service-level EMS system. The generalization of our  
21  
22 406 study findings to different EMS settings should be made with caution.

27 407 In conclusion, we presented data on TBI among patients with severe trauma assessed  
28  
29 408 by EMS providers, and our results inform the development of prediction models for the  
30  
31 409 diagnosis and prognosis of TBI in our population. We used various information that can be  
32  
33 410 obtained in prehospital settings and showed acceptable outcome performance. The consistent  
34  
35 411 importance of consciousness-status-related variables emphasizes the importance of  
36  
37 412 assessment and monitoring of consciousness status in prehospital areas. Although  
38  
39 413 prospective, and implementation studies are needed for TBI prediction in prehospital areas,  
40  
41 414 our study outlined a novel method for the precise assessment of EMS providers using a  
42  
43 415 machine-learning-based prediction model. Further collection of various types of patient-  
44  
45 416 related data would contribute to the enhanced performance of the clinical prediction model in  
46  
47 417 prehospital settings.

52 418

1  
2  
3  
4 419 **Author Contribution Statement**  
5

6  
7 420 YHC and JH Park designed and developed the study, analysed and interpreted the data, and  
8  
9 421 drafted the initial manuscript. KJH, YSR, KJS and SDS were involved in the acquisition of  
10  
11 422 data, the development of the research question and assisted with analysis and interpretation of  
12  
13  
14 423 data. All authors revised the drafts for intellectual content and edited the manuscript. All  
15  
16 424 authors reviewed and approved the final draft.  
17  
18  
19  
20 425  
21  
22

23 426 **Funding**  
24

25  
26 427 This study was supported by grant No. '04-2019-0680' from the Seoul National University  
27  
28 428 Hospital Research Fund.  
29  
30  
31 429  
32  
33

34 430 **Competing Interests**  
35

36 431 There are no conflicts of interest for all authors in this study.  
37  
38  
39 432  
40

41 433 **Patients consent**  
42

43 434 Not required  
44  
45  
46 435  
47  
48

49 436 **Data availability statement**  
50

51 437 No data are available. We do not have ethics approval to share data.  
52  
53  
54 438  
55  
56  
57  
58  
59  
60

1  
2  
3  
4 439 **Ethical statements**

5  
6 440 This study complied with the Declaration of Helsinki, and its protocol was approved by the  
7  
8 441 Institutional Review Board of the Seoul National University Hospital with a waiver of  
9  
10 442 informed consent (IRB No: E-2006-004-1128).  
11  
12

13 443

14  
15  
16  
17 444 **References**

- 18  
19 445 1. Hsia RY, Markowitz AJ, Lin F, et al. Ten-year trends in traumatic brain injury: a  
20  
21 446 retrospective cohort study of California emergency department and hospital revisits and  
22  
23 447 readmissions. *BMJ Open* 2018;8(12):e022297. doi: 10.1136/bmjopen-2018-022297  
24  
25 448 [published Online First: 2018/12/16]  
26  
27  
28 449 2. Finfer SR, Cohen J. Severe traumatic brain injury. *Resuscitation* 2001;48(1):77-90. doi:  
29  
30 450 10.1016/s0300-9572(00)00321-x [published Online First: 2001/02/13]  
31  
32  
33 451 3. Spaite DW, Bobrow BJ, Keim SM, et al. Association of Statewide Implementation of the  
34  
35 452 Prehospital Traumatic Brain Injury Treatment Guidelines With Patient Survival  
36  
37 453 Following Traumatic Brain Injury: The Excellence in Prehospital Injury Care (EPIC)  
38  
39 454 Study. *JAMA Surg* 2019;154(7):e191152. doi: 10.1001/jamasurg.2019.1152 [published  
40  
41 455 Online First: 2019/05/09]  
42  
43  
44 456 4. McHugh GS, Engel DC, Butcher I, et al. Prognostic value of secondary insults in traumatic  
45  
46 457 brain injury: results from the IMPACT study. *J Neurotrauma* 2007;24(2):287-93. doi:  
47  
48 458 10.1089/neu.2006.0031 [published Online First: 2007/03/23]  
49  
50  
51 459 5. Pelieu I, Kull C, Walder B. Prehospital and Emergency Care in Adult Patients with Acute  
52  
53 460 Traumatic Brain Injury. *Med Sci (Basel)* 2019;7(1) doi: 10.3390/medsci7010012  
54  
55 461 [published Online First: 2019/01/24]  
56  
57  
58 462 6. Sasser SM, Hunt RC, Faul M, et al. Guidelines for field triage of injured patients:  
59  
60

- 1  
2  
3  
4 463 recommendations of the National Expert Panel on Field Triage, 2011. *Morbidity and*  
5  
6 464 *Mortality Weekly Report: Recommendations and Reports* 2012;61(1):1-20.  
7  
8  
9 465 7. Ter Avest E, Taylor S, Wilson M, et al. Prehospital clinical signs are a poor predictor of  
10  
11 466 raised intracranial pressure following traumatic brain injury. *Emerg Med J*  
12  
13 467 2021;38(1):21-26. doi: 10.1136/emmermed-2020-209635 [published Online First:  
14  
15 468 2020/09/20]  
16  
17  
18 469 8. Collaborators MCT, Perel P, Arango M, et al. Predicting outcome after traumatic brain injury:  
19  
20 470 practical prognostic models based on large cohort of international patients. *BMJ*  
21  
22 471 2008;336(7641):425-9. doi: 10.1136/bmj.39461.643438.25 [published Online First:  
23  
24 472 2008/02/14]  
25  
26  
27 473 9. Steyerberg EW, Mushkudiani N, Perel P, et al. Predicting outcome after traumatic brain  
28  
29 474 injury: development and international validation of prognostic scores based on  
30  
31 475 admission characteristics. *PLoS Med* 2008;5(8):e165; discussion e65. doi:  
32  
33 476 10.1371/journal.pmed.0050165 [published Online First: 2008/08/08]  
34  
35  
36 477 10. Gozt AK, Hellewell SC, Thorne J, et al. Predicting outcome following mild traumatic brain  
37  
38 478 injury: protocol for the longitudinal, prospective, observational Concussion Recovery  
39  
40 479 (CREST) cohort study. *BMJ Open* 2021;11(5):e046460. doi: 10.1136/bmjopen-2020-  
41  
42 480 046460 [published Online First: 2021/05/15]  
43  
44  
45 481 11. Huth SF, Slater A, Waak M, et al. Predicting Neurological Recovery after Traumatic Brain  
46  
47 482 Injury in Children: A Systematic Review of Prognostic Models. *J Neurotrauma*  
48  
49 483 2020;37(20):2141-49. doi: 10.1089/neu.2020.7158 [published Online First: 2020/05/29]  
50  
51  
52 484 12. Perel P, Edwards P, Wentz R, et al. Systematic review of prognostic models in traumatic  
53  
54 485 brain injury. *BMC Med Inform Decis Mak* 2006;6:38. doi: 10.1186/1472-6947-6-38  
55  
56 486 [published Online First: 2006/11/16]  
57  
58  
59  
60



- 1  
2  
3  
4 487 13. Miller PR, Chang MC, Hoth JJ, et al. Predicting Mortality and Independence at Discharge  
5  
6 488 in the Aging Traumatic Brain Injury Population Using Data Available at Admission. *J*  
7  
8 489 *Am Coll Surg* 2017;224(4):680-85. doi: 10.1016/j.jamcollsurg.2016.12.053 [published  
9  
10 Online First: 2017/03/07]  
11 490  
12  
13 491 14. Abujaber A, Fadlalla A, Gammoh D, et al. Prediction of in-hospital mortality in patients  
14  
15 492 with post traumatic brain injury using National Trauma Registry and Machine Learning  
16  
17 493 Approach. *Scand J Trauma Resusc Emerg Med* 2020;28(1):44. doi: 10.1186/s13049-  
18  
19 494 020-00738-5 [published Online First: 2020/05/29]  
20  
21  
22 495 15. Gravesteijn BY, Nieboer D, Ercole A, et al. Machine learning algorithms performed no  
23  
24 496 better than regression models for prognostication in traumatic brain injury. *J Clin*  
25  
26 497 *Epidemiol* 2020;122:95-107. doi: 10.1016/j.jclinepi.2020.03.005 [published Online  
27  
28 498 First: 2020/03/24]  
29  
30  
31 499 16. Roozenbeek B, Lingsma HF, Lecky FE, et al. Prediction of outcome after moderate and  
32  
33 500 severe traumatic brain injury: external validation of the International Mission on  
34  
35 501 Prognosis and Analysis of Clinical Trials (IMPACT) and Corticoid Randomisation  
36  
37 502 After Significant Head injury (CRASH) prognostic models. *Crit Care Med*  
38  
39 503 2012;40(5):1609-17. doi: 10.1097/CCM.0b013e31824519ce [published Online First:  
40  
41 504 2012/04/19]  
42  
43  
44 505 17. Wasserman EB, Shah MN, Jones CM, et al. Identification of a neurologic scale that  
45  
46 506 optimizes EMS detection of older adult traumatic brain injury patients who require  
47  
48 507 transport to a trauma center. *Prehosp Emerg Care* 2015;19(2):202-12. doi:  
49  
50 508 10.3109/10903127.2014.959225 [published Online First: 2014/10/08]  
51  
52  
53 509 18. Collins GS, Reitsma JB, Altman DG, et al. Transparent Reporting of a multivariable  
54  
55 510 prediction model for Individual Prognosis Or Diagnosis (TRIPOD). *Ann Intern Med*  
56  
57  
58  
59  
60

- 1  
2  
3  
4 511 2015;162(10):735-6. doi: 10.7326/L15-5093-2 [published Online First: 2015/05/20]  
5  
6 512 19. Sasser SM, Hunt RC, Sullivent EE, et al. Guidelines for field triage of injured patients:  
7  
8 513 recommendations of the National Expert Panel on Field Triage. 2009  
9  
10 514 20. Sasser SM, Hunt RC, Faul M, et al. Guidelines for field triage of injured patients:  
11  
12 515 recommendations of the National Expert Panel on Field Triage, 2011. *MMWR Recomm*  
13  
14 516 *Rep* 2012;61(RR-1):1-20. [published Online First: 2012/01/13]  
15  
16 517 21. Andelic N, Anke A, Skandsen T, et al. Incidence of hospital-admitted severe traumatic  
17  
18 518 brain injury and in-hospital fatality in Norway: a national cohort study.  
19  
20 519 *Neuroepidemiology* 2012;38(4):259-67. doi: 10.1159/000338032 [published Online  
21  
22 520 First: 2012/06/09]  
23  
24 521 22. Ro YS, Shin SD, Holmes JF, et al. Comparison of clinical performance of cranial computed  
25  
26 522 tomography rules in patients with minor head injury: a multicenter prospective study.  
27  
28 523 *Acad Emerg Med* 2011;18(6):597-604. doi: 10.1111/j.1553-2712.2011.01094.x  
29  
30 524 [published Online First: 2011/06/17]  
31  
32 525 23. Chan V, Thuraiajah P, Colantonio A. Defining pediatric traumatic brain injury using  
33  
34 526 International Classification of Diseases Version 10 Codes: a systematic review. *BMC*  
35  
36 527 *Neurol* 2015;15:7. doi: 10.1186/s12883-015-0259-7 [published Online First:  
37  
38 528 2015/02/05]  
39  
40 529 24. Zou H, Hastie T. Regularization and variable selection via the elastic net. *Journal of the*  
41  
42 530 *Royal Statistical Society: Series B (Statistical Methodology)* 2005;67(2):301-20. doi:  
43  
44 531 10.1111/j.1467-9868.2005.00503.x  
45  
46 532 25. Hearst MA, Dumais ST, Osuna E, et al. Support vector machines. *IEEE Intelligent Systems*  
47  
48 533 *and their Applications* 1998;13(4):18-28. doi: 10.1109/5254.708428  
49  
50 534 26. Chen T, Guestrin C. XGBoost: A Scalable Tree Boosting System. Proceedings of the 22nd  
51  
52  
53  
54  
55  
56  
57  
58  
59  
60

- 1  
2  
3  
4 535 ACM SIGKDD International Conference on Knowledge Discovery and Data Mining.  
5  
6 536 San Francisco, California, USA: Association for Computing Machinery, 2016:785–94.  
7  
8  
9 537 27. Menard S. Applied logistic regression analysis: Sage 2002. pp. 162.  
10  
11 538 28. Oostema JA, Konen J, Chassee T, et al. Clinical predictors of accurate prehospital stroke  
12  
13 539 recognition. *Stroke* 2015;46(6):1513-7. doi: 10.1161/STROKEAHA.115.008650  
14  
15 540 [published Online First: 2015/04/30]  
16  
17  
18 541 29. Swan PY, Nighswonger B, Boswell GL, et al. Factors associated with false-positive  
19  
20 542 emergency medical services triage for percutaneous coronary intervention. *West J*  
21  
22 543 *Emerg Med* 2009;10(4):208-12. [published Online First: 2010/01/05]  
23  
24  
25 544 30. Park JH, Shin SD, Song KJ, et al. Prediction of good neurological recovery after out-of-  
26  
27 545 hospital cardiac arrest: A machine learning analysis. *Resuscitation* 2019;142:127-35.  
28  
29 546 doi: 10.1016/j.resuscitation.2019.07.020 [published Online First: 2019/07/31]  
30  
31  
32 547 31. Esposito TJ, Offner PJ, Jurkovich GJ, et al. Do prehospital trauma center triage criteria  
33  
34 548 identify major trauma victims? *Arch Surg* 1995;130(2):171-6. doi:  
35  
36 549 10.1001/archsurg.1995.01430020061010 [published Online First: 1995/02/01]  
37  
38  
39 550 32. Ocak G, Sturms LM, Hoogeveen JM, et al. Prehospital identification of major trauma  
40  
41 551 patients. *Langenbecks Arch Surg* 2009;394(2):285-92. doi: 10.1007/s00423-008-0340-  
42  
43 552 4 [published Online First: 2008/06/27]  
44  
45  
46 553 33. Fries GR, McCalla G, Levitt MA, et al. A prospective comparison of paramedic judgment  
47  
48 554 and the trauma triage rule in the prehospital setting. *Ann Emerg Med* 1994;24(5):885-  
49  
50 555 9. doi: 10.1016/s0196-0644(94)70207-1 [published Online First: 1994/11/01]  
51  
52  
53 556 34. Branas CC, MacKenzie EJ, Williams JC, et al. Access to trauma centers in the United States.  
54  
55 557 *JAMA* 2005;293(21):2626-33. doi: 10.1001/jama.293.21.2626 [published Online First:  
56  
57 558 2005/06/02]  
58  
59  
60

- 1  
2  
3  
4 559 35. Whiting MD, Dengler BA, Rodriguez CL, et al. Prehospital Detection of Life-Threatening  
5  
6 560 Intracranial Pathology: An Unmet Need for Severe TBI in Austere, Rural, and Remote  
7  
8 561 Areas. *Front Neurol* 2020;11:599268. doi: 10.3389/fneur.2020.599268 [published  
9  
10 Online First: 2020/11/17]  
11 562  
12  
13 563 36. Wojcik SM. Predicting mild traumatic brain injury patients at risk of persistent symptoms  
14  
15 564 in the Emergency Department. *Brain Inj* 2014;28(4):422-30. doi:  
16  
17 565 10.3109/02699052.2014.884241 [published Online First: 2014/02/26]  
18  
19  
20 566 37. Management of Concussion/m TBIWG. VA/DoD Clinical Practice Guideline for  
21  
22 567 Management of Concussion/Mild Traumatic Brain Injury. *J Rehabil Res Dev*  
23  
24 568 2009;46(6):CP1-68. [published Online First: 2010/01/30]  
25  
26  
27 569 38. Grote S, Bocker W, Mutschler W, et al. Diagnostic value of the Glasgow Coma Scale for  
28  
29 570 traumatic brain injury in 18,002 patients with severe multiple injuries. *J Neurotrauma*  
30  
31 571 2011;28(4):527-34. doi: 10.1089/neu.2010.1433 [published Online First: 2011/01/27]  
32  
33  
34 572 39. Badjatia N, Carney N, Crocco TJ, et al. Guidelines for prehospital management of traumatic  
35  
36 573 brain injury 2nd edition. *Prehosp Emerg Care* 2008;12 Suppl 1:S1-52. doi:  
37  
38 574 10.1080/10903120701732052 [published Online First: 2008/09/06]  
39  
40  
41 575 40. Christodoulou E, Ma J, Collins GS, et al. A systematic review shows no performance  
42  
43 576 benefit of machine learning over logistic regression for clinical prediction models. *J*  
44  
45 577 *Clin Epidemiol* 2019;110:12-22. doi: 10.1016/j.jclinepi.2019.02.004 [published Online  
46  
47 First: 2019/02/15]  
48 578  
49  
50 579 41. Nakada TA, Masunaga N, Nakao S, et al. Development of a prehospital vital signs chart  
51  
52 580 sharing system. *Am J Emerg Med* 2016;34(1):88-92. doi: 10.1016/j.ajem.2015.09.048  
53  
54 581 [published Online First: 2015/10/29]  
55  
56  
57 582 42. Kim Y, Groombridge C, Romero L, et al. Decision Support Capabilities of Telemedicine  
58  
59  
60

- 1  
2  
3  
4 583 in Emergency Prehospital Care: Systematic Review. *J Med Internet Res*  
5  
6 584 2020;22(12):e18959. doi: 10.2196/18959 [published Online First: 2020/12/09]  
7  
8  
9 585 43. Reisner AT, Khitrov MY, Chen L, et al. Development and validation of a portable platform  
10  
11 586 for deploying decision-support algorithms in prehospital settings. *Appl Clin Inform*  
12  
13 587 2013;4(3):392-402. doi: 10.4338/ACI-2013-04-RA-0023 [published Online First:  
14  
15 588 2013/10/25]  
16  
17  
18 589 44. Maslove DM, Podchiyska T, Lowe HJ. Discretization of continuous features in clinical  
19  
20 590 datasets. *J Am Med Inform Assoc* 2013;20(3):544-53. doi: 10.1136/amiajnl-2012-  
21  
22 591 000929 [published Online First: 2012/10/13]  
23  
24  
25  
26 592  
27  
28  
29  
30  
31  
32  
33  
34  
35  
36  
37  
38  
39  
40  
41  
42  
43  
44  
45  
46  
47  
48  
49  
50  
51  
52  
53  
54  
55  
56  
57  
58  
59  
60

1  
2  
3  
4 593 **Figure legends**  
5

6  
7 594 Figure 1. Population flow. EMS, emergency medical service; OHCA, out-of-hospital cardiac  
8  
9 595 arrest; TBI, traumatic brain injury.

10 596  
11  
12  
13  
14  
15  
16  
17  
18  
19  
20  
21  
22  
23  
24  
25  
26  
27  
28  
29  
30  
31  
32  
33  
34  
35  
36  
37  
38  
39  
40  
41  
42  
43  
44  
45  
46  
47  
48  
49  
50  
51  
52  
53  
54  
55  
56  
57  
58  
59  
60

For peer review only

597 Table 1. Key characteristics of the development and test cohorts.

|                              | n (%) or Median (IQR) |                    |               | P      |
|------------------------------|-----------------------|--------------------|---------------|--------|
|                              | Total                 | Development cohort | Test cohort   |        |
| Total                        | N = 1169              | n = 867            | n = 302       |        |
| Demographics                 |                       |                    |               |        |
| Age, years                   | 53 (36–66)            | 52 (35–66)         | 56 (40–69)    | < 0.01 |
| Male                         | 809 (69.2)            | 592 (68.3)         | 217 (71.9)    | 0.25   |
| Job, unemployed              | 299 (25.6)            | 197 (22.7)         | 102 (33.8)    | < 0.01 |
| Diabetes                     | 62 (5.3)              | 35 (4.0)           | 27 (8.9)      | < 0.01 |
| Hypertension                 | 105 (9.0)             | 61 (7.0)           | 44 (14.6)     | < 0.01 |
| Circumstances of trauma      |                       |                    |               |        |
| Location, road/highway       | 444 (38.0)            | 326 (37.6)         | 118 (39.1)    | 0.65   |
| Season, summer               | 336 (28.7)            | 253 (29.2)         | 83 (27.5)     | 0.57   |
| Weekday, weekend             | 811 (69.4)            | 599 (69.1)         | 212 (70.2)    | 0.72   |
| Time, 6 p.m. to midnight     | 361 (30.9)            | 265 (30.6)         | 96 (31.8)     | 0.69   |
| Mechanism of injury, TA      | 500 (42.8)            | 375 (43.3)         | 125 (41.4)    | 0.57   |
| Chief complaint              |                       |                    |               |        |
| Fracture/abrasion/laceration | 302 (25.8)            | 204 (23.5)         | 98 (32.5)     | < 0.01 |
| EMS vital sign assessment    |                       |                    |               |        |
| SBP, mmHg                    | 130 (109–150)         | 130 (104–146)      | 131 (115–150) | < 0.01 |
| DBP, mmHg                    | 80 (70–91)            | 80 (69–90)         | 80 (70–92)    | 0.21   |
| RR, /min                     | 18 (16–20)            | 18 (16–20)         | 18 (16–20)    | 0.33   |
| HR, /min                     | 86 (75–99)            | 86 (74–99)         | 86 (76–100)   | 0.40   |
| SpO <sub>2</sub> , %         | 98 (95–99)            | 98 (95–99)         | 98 (96–99)    | 0.67   |
| AVPU scale, Alert            | 714 (61.1)            | 504 (58.1)         | 210 (69.5)    | < 0.01 |
| EMS management               |                       |                    |               |        |
| Intravenous route            | 176 (15.1)            | 129 (14.9)         | 47 (15.6)     | 0.77   |
| Hemorrhage control           | 586 (50.1)            | 426 (49.1)         | 160 (53.0)    | 0.25   |
| Spinal motion restriction    | 811 (69.4)            | 606 (69.9)         | 205 (67.9)    | 0.51   |
| Oxygen supply                | 233 (19.9)            | 176 (20.3)         | 57 (18.9)     | 0.59   |
| In-hospital mortality        | 90 (7.7)              | 74 (8.5)           | 16 (5.3)      | 0.07   |
| Outcomes                     |                       |                    |               |        |
| TBI                          | 281 (24.0)            | 215 (24.8)         | 66 (21.9)     | 0.30   |
| TBI with intracranial injury | 251 (21.5)            | 195 (22.5)         | 56 (18.5)     | 0.15   |
| TBI-related non-discharge    | 249 (21.3)            | 192 (22.1)         | 57 (18.9)     | 0.23   |
| TBI-related death            | 43 (3.7)              | 32 (3.7)           | 11 (3.6)      | 0.95   |

598 IQR, interquartile range; TA, traffic accident; SBP, systolic blood pressure; DBP, diastolic  
599 blood pressure; RR, respiratory rate; AVPU, mental status in alert, verbal, pain, and  
600 unresponsive scale; ED, emergency department; TBI, traumatic brain injury.

601 Table 2. Discrimination and reclassification of prediction models for outcomes on test  
602 cohort.

| Outcome | Model | AUROC (95% CI)       | p <sup>a</sup> | NRI (95% CI)           | p <sup>b</sup> | AUPRC |
|---------|-------|----------------------|----------------|------------------------|----------------|-------|
| TBI     |       |                      |                |                        |                |       |
|         | LR    | 0.770 (0.698, 0.841) | NA             | NA                     | NA             | 0.492 |
|         | XGB   | 0.809 (0.743, 0.876) | 0.04           | 0.689 (0.427, 0.951)   | < 0.01         | 0.552 |
|         | SVM   | 0.776 (0.708, 0.844) | 0.77           | 0.339 (0.072, 0.607)   | 0.01           | 0.479 |
|         | RF    | 0.800 (0.735, 0.865) | 0.13           | 0.308 (0.047, 0.569)   | 0.02           | 0.532 |
|         | EN    | 0.799 (0.732, 0.867) | 0.06           | 0.698 (0.441, 0.954)   | < 0.01         | 0.564 |
| TBI-I   |       |                      |                |                        |                |       |
|         | LR    | 0.820 (0.751, 0.890) | NA             | NA                     | NA             | 0.551 |
|         | XGB   | 0.838 (0.775, 0.901) | 0.28           | 0.539 (0.258, 0.821)   | < 0.01         | 0.554 |
|         | SVM   | 0.812 (0.748, 0.875) | 0.66           | 0.729 (0.464, 0.994)   | < 0.01         | 0.469 |
|         | RF    | 0.836 (0.772, 0.899) | 0.38           | 0.333 (0.058, 0.607)   | 0.02           | 0.552 |
|         | EN    | 0.844 (0.779, 0.910) | 0.15           | 1.093 (0.845, 1.342)   | < 0.01         | 0.606 |
| TBI-ND  |       |                      |                |                        |                |       |
|         | LR    | 0.767 (0.690, 0.844) | NA             | NA                     | NA             | 0.482 |
|         | XGB   | 0.800 (0.727, 0.873) | 0.07           | 0.605 (0.326, 0.884)   | < 0.01         | 0.496 |
|         | SVM   | 0.778 (0.704, 0.852) | 0.56           | 0.285 (-0.001, 0.572)  | 0.05           | 0.477 |
|         | RF    | 0.809 (0.739, 0.880) | 0.03           | 0.194 (-0.059, 0.448)  | 0.13           | 0.535 |
|         | EN    | 0.811 (0.741, 0.882) | 0.02           | 0.768 (0.496, 1.039)   | < 0.01         | 0.551 |
| TBI-D   |       |                      |                |                        |                |       |
|         | LR    | 0.664 (0.490, 0.838) | NA             | NA                     | NA             | 0.138 |
|         | XGB   | 0.714 (0.512, 0.917) | 0.64           | -0.026 (-0.605, 0.553) | 0.93           | 0.094 |
|         | SVM   | 0.814 (0.718, 0.910) | 0.09           | 0.209 (-0.325, 0.742)  | 0.44           | 0.140 |
|         | RF    | 0.889 (0.801, 0.976) | < 0.01         | -0.204 (-0.742, 0.334) | 0.46           | 0.196 |
|         | EN    | 0.871 (0.764, 0.978) | 0.01           | 0.119 (-0.415, 0.654)  | 0.66           | 0.293 |

603 <sup>a</sup>Comparing the AUROC and the logistic regression model.

604 <sup>b</sup>Comparing the NRI and the logistic regression model.

605 AUROC, area under the receiver operating characteristic curve; CI, confidence interval;

606 NRI, net reclassification index; AUPRC, area under precision-recall curve; TBI,

607 traumatic brain injury, TBI-I, traumatic brain injury with intracranial injury; TBI-ND;

608 traumatic brain injury with non-discharge; TBI-D, traumatic brain injury with death;

609 LR, logistic regression analysis; XGB, extreme gradient boosting; SVM, support vector

610 machine; RF, random forest; EN, elastic net

611

612

613



614 Table 3. Test characteristics of prediction models for outcomes on test cohort.

| Outcome | Model | Specificity (95% CI) | Sensitivity (95% CI) | PPV (95% CI)      | NPV (95% CI)      | Cutoff |
|---------|-------|----------------------|----------------------|-------------------|-------------------|--------|
| TBI     |       |                      |                      |                   |                   |        |
|         | LR    | 47.5 (40.9, 54.0)    | 80.3 (68.7, 89.1)    | 29.9 (23.3, 37.3) | 89.6 (82.9, 94.3) | 0.136  |
|         | XGB   | 72.5 (66.3, 78.1)    | 80.3 (68.7, 89.1)    | 44.9 (35.7, 54.3) | 92.9 (88.2, 96.2) | 0.268  |
|         | SVM   | 64.8 (58.4, 70.9)    | 80.3 (68.7, 89.1)    | 39.0 (30.7, 47.7) | 92.2 (87.0, 95.8) | 0.191  |
|         | RF    | 68.2 (61.9, 74.1)    | 80.3 (68.7, 89.1)    | 41.4 (32.8, 50.4) | 92.5 (87.6, 96.0) | 0.185  |
|         | EN    | 61.0 (54.5, 67.3)    | 80.3 (68.7, 89.1)    | 36.6 (28.7, 44.9) | 91.7 (86.3, 95.5) | 0.205  |
| TBI-I   |       |                      |                      |                   |                   |        |
|         | LR    | 71.1 (65.0, 76.7)    | 80.4 (67.6, 89.8)    | 38.8 (29.9, 48.3) | 94.1 (89.7, 97.0) | 0.164  |
|         | XGB   | 74.0 (68.0, 79.4)    | 80.4 (67.6, 89.8)    | 41.3 (31.9, 51.1) | 94.3 (90.0, 97.1) | 0.143  |
|         | SVM   | 71.1 (65.0, 76.7)    | 80.4 (67.6, 89.8)    | 38.8 (29.9, 48.3) | 94.1 (89.7, 97.0) | 0.172  |
|         | RF    | 76.0 (70.2, 81.2)    | 80.4 (67.6, 89.8)    | 43.3 (33.6, 53.3) | 94.4 (90.3, 97.2) | 0.205  |
|         | EN    | 81.3 (75.9, 86.0)    | 80.4 (67.6, 89.8)    | 49.5 (38.8, 60.1) | 94.8 (90.9, 97.4) | 0.204  |
| TBI-ND  |       |                      |                      |                   |                   |        |
|         | LR    | 46.1 (39.8, 52.6)    | 80.7 (68.1, 90.0)    | 25.8 (19.6, 32.9) | 91.1 (84.7, 95.5) | 0.090  |
|         | XGB   | 66.5 (60.2, 72.4)    | 80.7 (68.1, 90.0)    | 35.9 (27.7, 44.9) | 93.7 (89.0, 96.8) | 0.242  |
|         | SVM   | 59.2 (52.7, 65.4)    | 80.7 (68.1, 90.0)    | 31.5 (24.1, 39.7) | 92.9 (87.7, 96.4) | 0.147  |
|         | RF    | 60.4 (54.0, 66.6)    | 80.7 (68.1, 90.0)    | 32.2 (24.6, 40.5) | 93.1 (88.0, 96.5) | 0.138  |
|         | EN    | 74.3 (68.3, 79.6)    | 80.7 (68.1, 90.0)    | 42.2 (32.8, 52.0) | 94.3 (90.0, 97.1) | 0.201  |
| TBI-D   |       |                      |                      |                   |                   |        |
|         | LR    | 42.6 (36.9, 48.5)    | 81.8 (48.2, 97.7)    | 5.1 (2.4, 9.5)    | 98.4 (94.4, 99.8) | 0.005  |
|         | XGB   | 57.7 (51.8, 63.5)    | 81.8 (48.2, 97.7)    | 6.8 (3.2, 12.5)   | 98.8 (95.8, 99.9) | 0.002  |
|         | SVM   | 74.2 (68.8, 79.2)    | 81.8 (48.2, 97.7)    | 10.7 (5.0, 19.4)  | 99.1 (96.7, 99.9) | 0.039  |
|         | RF    | 74.9 (69.5, 79.8)    | 81.8 (48.2, 97.7)    | 11.0 (5.1, 19.8)  | 99.1 (96.8, 99.9) | 0.005  |
|         | EN    | 79.0 (73.9, 83.6)    | 81.8 (48.2, 97.7)    | 12.9 (6.1, 23.0)  | 99.1 (96.9, 99.9) | 0.033  |

615 TBI, traumatic brain injury; TBI-I, traumatic brain injury with intracranial injury; TBI-  
616 ND; traumatic brain injury with non-discharge; TBI-D, traumatic brain injury with  
617 death; LR, logistic regression analysis; XGB, extreme gradient boosting; SVM, support  
618 vector machine; RF, random forest; EN, elastic net.

619

620 Table 4. Top 5 important variables for outcomes in descending order using model  
621 specific metrics

| Outcome | Rank | LR                    | XGB                   | RF                    | EN                    |
|---------|------|-----------------------|-----------------------|-----------------------|-----------------------|
| TBI     |      |                       |                       |                       |                       |
|         | 1    | Loss of consciousness | Loss of consciousness | Loss of consciousness | Loss of consciousness |
|         | 2    | GCS, Eye, 1           | GCS, Eye, 1           | GCS, Eye, 1           | GCS, Motor, 1         |
|         | 3    | GCS, Verbal, 1        | GCS, Verbal, 1        | GCS, Verbal, 1        | GCS, Motor, 2         |
|         | 4    | Light reflex          | Other mechanism       | Light reflex          | GCS, Eye, 1           |
|         | 5    | GCS, Motor, 1         | GCS, Verbal, 2        | GCS, Motor, 1         | GCS, Verbal, 1        |
| TBI-I   |      |                       |                       |                       |                       |
|         | 1    | Loss of consciousness | Loss of consciousness | Loss of consciousness | GCS, Eye, 1           |
|         | 2    | GCS, Eye, 1           | GCS, Eye, 1           | GCS, Eye, 1           | Loss of consciousness |
|         | 3    | GCS, Verbal, 1        | GCS, Verbal, 1        | GCS, Verbal, 1        | GCS, Motor, 1         |
|         | 4    | Light reflex          | GCS, Verbal, 2        | Light reflex          | GCS, Verbal, 1        |
|         | 5    | GCS, Motor, 1         | Other mechanism       | GCS, Motor, 1         | Light reflex          |
| TBI-ND  |      |                       |                       |                       |                       |
|         | 1    | Loss of consciousness | Loss of consciousness | Loss of consciousness | Loss of consciousness |
|         | 2    | GCS, Eye, 1           | GCS, Eye, 1           | GCS, Eye, 1           | GCS, Eye, 1           |
|         | 3    | GCS, Verbal, 1        | GCS, Verbal, 1        | GCS, Verbal, 1        | GCS, Motor, 1         |
|         | 4    | Light reflex          | GCS, Verbal, 2        | GCS, Verbal, 2        | GCS, Verbal, 1        |
|         | 5    | GCS, Motor, 1         | GCS, Motor, 1         | GCS, Motor, 4         | Light reflex          |
| TBI-D   |      |                       |                       |                       |                       |
|         | 1    | Loss of consciousness | GCS, Verbal, 1        | GCS, Verbal, 1        | GCS, Motor, 2         |
|         | 2    | GCS, Verbal, 1        | Oxygen saturation<96% | Light reflex          | GCS, Verbal, 1        |
|         | 3    | GCS, Eye, 1           | Fall mechanism        | Loss of consciousness | Loss of consciousness |
|         | 4    | Light reflex          | Afternoon             | GCS, Eye, 1           | Age over 80           |
|         | 5    | GCS, Motor, 1         | Light reflex          | GCS, Motor, 1         | HR 87-99              |

622 TBI, traumatic brain injury; TBI-I, traumatic brain injury with intracranial injury; TBI-  
623 ND; traumatic brain injury with non-discharge; TBI-D, traumatic brain injury with  
624 death; LR, logistic regression; XGB, extreme gradient boosting; RF, random forest; EN,  
625 elastic net; GCS, Glasgow coma scale; HR, heart rate.

626

1  
2  
3  
4  
5  
6  
7  
8  
9  
10  
11  
12  
13  
14  
15  
16  
17  
18  
19  
20  
21  
22  
23  
24  
25  
26  
27  
28  
29  
30  
31  
32  
33  
34  
35  
36  
37  
38  
39  
40  
41  
42  
43  
44  
45  
46  
47  
48  
49  
50  
51  
52  
53  
54  
55  
56  
57  
58  
59  
60

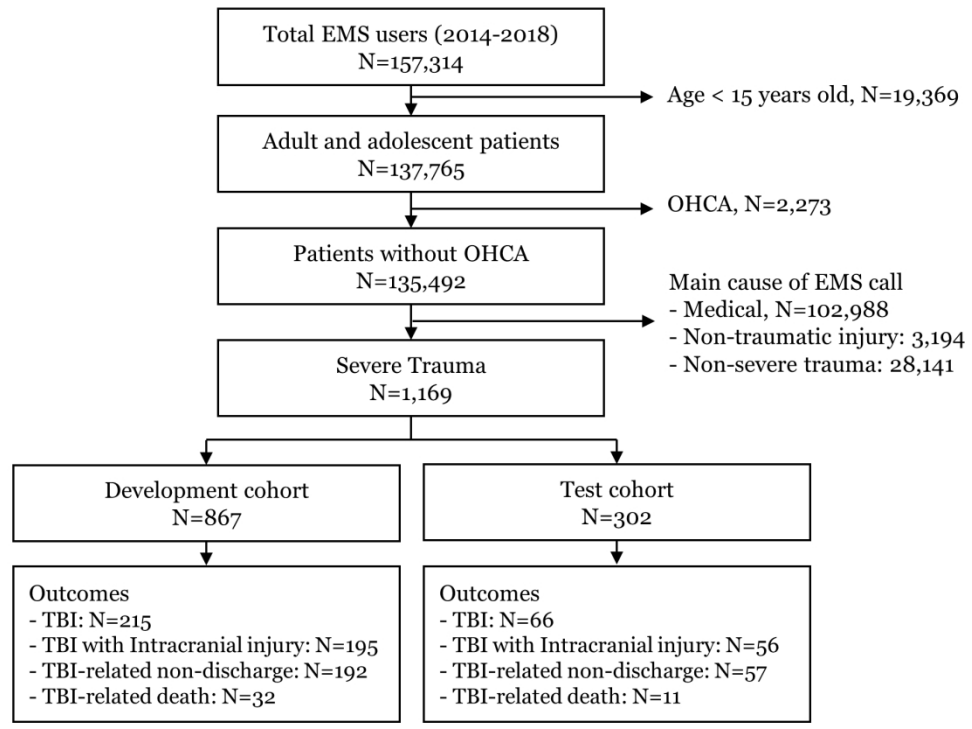

Figure 1

165x119mm (300 x 300 DPI)

Supplementary Table 1. List of analyzed variables.

| Variables                 | Descriptions                                  | Type of raw data | Category                                                                                                               | Preprocessing                                                     |
|---------------------------|-----------------------------------------------|------------------|------------------------------------------------------------------------------------------------------------------------|-------------------------------------------------------------------|
| Gender                    | Sex of the patients                           | Binary           | Male, Female                                                                                                           |                                                                   |
| Age                       | Age of patients                               | Continuous       | 15-39 years, 40-59 years, 60-79 years, and 80- years                                                                   | Discretization and one hot encoding                               |
| Job                       | Job of patients                               | Categorical      | Unemployed, Student/Housewife; Office/Commercial/Service workers; Industrial/Agricultural/Fishery/Miner worker; Others | One hot encoding<br>Missing data were classified into others      |
| Diabetes                  | History of diabetes mellitus                  | Binary           | Yes, No                                                                                                                | Missing data were classified into no                              |
| Hypertension              | History of hypertension                       | Binary           | Yes, No                                                                                                                | Missing data were classified into no                              |
| Location of injury        | Location of injury                            | Categorical      | home/residential area/medical facility/school/gym; Road/highway; Off-road traffic area; Others                         | One hot encoding<br>Missing data were classified into others      |
| Season                    | Season when injury occurred                   | Categorical      | Spring, Summer, Fall, Winter                                                                                           | One hot encoding                                                  |
| Weekend                   | Whether Injury occurred on weekday or weekend | Binary           | Weekday, Weekend                                                                                                       |                                                                   |
| Daytime                   | When injury was occurred                      | Categorical      | Night (Midnight to 5AM), Morning (6AM to 11AM), Afternoon (Midday to 5PM), Evening (6PM to 11PM)                       | One hot encoding<br>Missing time were imputed using EMS call time |
| Mechanism of injury       | Mechanism of injury                           | Categorical      | Slip down, Fall down, Traffic accident, Other                                                                          | One hot encoding<br>Missing data were classified into others      |
| Glasgow coma scale eye    | Eye element of Glasgow coma scale             | Categorical      | 1;2;3;4;Unknown                                                                                                        | One hot encoding                                                  |
| Glasgow coma scale Verbal | Verbal element of Glasgow coma scale          | Categorical      | 1;2;3;4;5;Unknown                                                                                                      | One hot encoding                                                  |
| Glasgow coma scale Motor  | Motor element of Glasgow coma scale           | Categorical      | 1;2;3;4;5;6;Unknown                                                                                                    | One hot encoding                                                  |
| Light Reflex any Abnormal | Any abnormality of light reflex on any side   | Categorical      | No, Yes, Unknown                                                                                                       | One hot encoding<br>Missing data were classified into unknown     |

|                              |       |                                         |            |                                                           |                                                                                                                                                                                         |
|------------------------------|-------|-----------------------------------------|------------|-----------------------------------------------------------|-----------------------------------------------------------------------------------------------------------------------------------------------------------------------------------------|
| Systolic blood pressure      | blood | Systolic blood pressure                 | Continuous | -107 mmHg, 108-130 mmHg, 131-145 mmHg, 146- mmHg, Unknown | Discretization and one hot encoding<br>Cutoff values for categories were calculated from median and interquartile range of training cohort<br>Missing data were classified into unknown |
| Diastolic pressure           | blood | Diastolic blood pressure                | Continuous | -69 mmHg, 70-80 mmHg, 81-91 mmHg, 92- mmHg, Unknown       | Discretization and one hot encoding<br>Cutoff values for categories were calculated from median and interquartile range of training cohort<br>Missing data were classified into unknown |
| Heart rate                   |       | Heart rate                              | Continuous | -74/min, 75-86/min, 87-99/min, 100-/min, Unknown          | Discretization and one hot encoding<br>Cutoff values for categories were calculated from median and interquartile range of training cohort<br>Missing data were classified into unknown |
| Respiratory rate             |       | Respiratory rate                        | Continuous | -16/min, 17-18/min, 19-20/min, 21-/min, Unknown           | Discretization and one hot encoding<br>Cutoff values for categories were calculated from median and interquartile range of training cohort<br>Missing data were classified into unknown |
| Oxygen saturation            |       | Oxygen saturation                       | Continuous | -95%, 96-98%, 99%, 100%, Unknown                          | Discretization and one hot encoding<br>Cutoff values for categories were calculated from median and interquartile range of training cohort<br>Missing data were classified into unknown |
| Body temperature             |       | Body temperature                        | Continuous | -36°C, 36.1-36.3°C, 36.4-36.8°C, 36.9-°C, Unknown         | Discretization and one hot encoding<br>Cutoff values for categories were calculated from median and interquartile range of training cohort<br>Missing data were classified into unknown |
| Chest pain or abdominal pain |       | Symptom of chest pain or abdominal pain | Binary     | Yes, No                                                   |                                                                                                                                                                                         |

|                                   |                                                                                                                            |        |         |  |
|-----------------------------------|----------------------------------------------------------------------------------------------------------------------------|--------|---------|--|
| Fracture, abrasion, or laceration | Symptom of fracture, abrasion, or laceration                                                                               | Binary | Yes, No |  |
| Loss of consciousness             | Symptom of loss of consciousness (whether patients had loss of consciousness between injury and EMS provider's assessment) | Binary | Yes, No |  |
| Dyspnea                           | Symptom of dyspnea                                                                                                         | Binary | Yes, No |  |
| Nose bleeding                     | Symptom of nose bleeding                                                                                                   | Binary | Yes, No |  |
| Nausea or vomiting                | Symptom of nausea or vomiting                                                                                              | Binary | Yes, No |  |
| Headache, paralysis or dizziness  | Symptom of headache, paralysis or dizziness                                                                                | Binary | Yes, No |  |

Supplementary Table 2. Demographic characteristics of development and test cohorts

| Characteristics                                 | N (%) or Median (IQR) |             |            | P-value |
|-------------------------------------------------|-----------------------|-------------|------------|---------|
|                                                 | Total                 | Development | Test       |         |
| Total                                           | 1169                  | 867         | 302        |         |
| Demographics                                    |                       |             |            |         |
| Male                                            | 809 (69.2)            | 592 (68.3)  | 217 (71.9) | 0.25    |
| Age, years                                      | 53 (36-66)            | 52 (35-66)  | 56 (40-69) | <0.01   |
| Job of patients                                 |                       |             |            | <0.01   |
| Unemployed                                      | 299 (25.6)            | 197 (22.7)  | 102 (33.8) |         |
| Student/Housewife                               | 161 (13.8)            | 129 (14.9)  | 32 (10.6)  |         |
| Office/Commercial/Service worker                | 283 (24.2)            | 176 (20.3)  | 107 (35.4) |         |
| Industrial/Agricultural/Fishery/Minery worker   | 36 (3.1)              | 25 (2.9)    | 11 (3.6)   |         |
| Others                                          | 390 (33.4)            | 340 (39.2)  | 50 (16.6)  |         |
| Past medical history                            |                       |             |            |         |
| Diabetes                                        | 62 (5.3)              | 35 (4.0)    | 27 (8.9)   | <0.01   |
| Hypertension                                    | 105 (9.0)             | 61 (7.0)    | 44 (14.6)  | <0.01   |
| Circumstances of Trauma                         |                       |             |            |         |
| Location of trauma                              |                       |             |            | 0.52    |
| Residential/Nursing/Education/Exercise facility | 303 (25.9)            | 218 (25.1)  | 85 (28.1)  |         |
| Road/Highway                                    | 444 (38.0)            | 326 (37.6)  | 118 (39.1) |         |
| Off-road traffic area                           | 181 (15.5)            | 140 (16.1)  | 41 (13.6)  |         |
| Others                                          | 241 (20.6)            | 183 (21.1)  | 58 (19.2)  |         |
| Season of trauma                                |                       |             |            | <0.01   |
| Spring                                          | 249 (21.3)            | 167 (19.3)  | 82 (27.2)  |         |
| Summer                                          | 336 (28.7)            | 253 (29.2)  | 83 (27.5)  |         |
| Fall                                            | 304 (26.0)            | 242 (27.9)  | 62 (20.5)  |         |
| Winter                                          | 280 (24.0)            | 205 (23.6)  | 75 (24.8)  |         |
| Weekday                                         | 811 (69.4)            | 599 (69.1)  | 212 (70.2) | 0.72    |
| Time of trauma                                  |                       |             |            | 0.83    |
| 6A-MD                                           | 281 (24.0)            | 206 (23.8)  | 75 (24.8)  |         |
| MD-6P                                           | 266 (22.8)            | 203 (23.4)  | 63 (20.9)  |         |
| 6P-MN                                           | 361 (30.9)            | 265 (30.6)  | 96 (31.8)  |         |
| MN-6A                                           | 261 (22.3)            | 193 (22.3)  | 68 (22.5)  |         |
| Mechanism of Trauma                             |                       |             |            | 0.60    |
| Traffic accident                                | 500 (42.8)            | 375 (43.3)  | 125 (41.4) |         |
| Slip down                                       | 325 (27.8)            | 232 (26.8)  | 93 (30.8)  |         |
| Fall down                                       | 171 (14.6)            | 129 (14.9)  | 42 (13.9)  |         |
| Others                                          | 173 (14.8)            | 131 (15.1)  | 42 (13.9)  |         |
| Chief complaint                                 |                       |             |            |         |
| Altered mentality                               | 279 (23.9)            | 223 (25.7)  | 56 (18.5)  | 0.01    |
| Fracture/Abrasion/Laceration                    | 302 (25.8)            | 204 (23.5)  | 98 (32.5)  | <0.01   |
| Chest/Abdominal pain                            | 47 (4.0)              | 31 (3.6)    | 16 (5.3)   | 0.19    |
| Dyspnea                                         | 25 (2.1)              | 20 (2.3)    | 5 (1.7)    | 0.50    |

|    |                                      |            |                |             |       |
|----|--------------------------------------|------------|----------------|-------------|-------|
| 1  |                                      |            |                |             |       |
| 2  |                                      |            |                |             |       |
| 3  |                                      |            |                |             |       |
| 4  |                                      |            |                |             |       |
| 5  | Epistaxis                            | 44 (3.8)   | 30 (3.5)       | 14 (4.6)    | 0.36  |
| 6  | Headache/Paralysis/Dizziness/Vertigo | 95 (8.1)   | 64 (7.4)       | 31 (10.3)   | 0.11  |
| 7  | Nausea/Vomiting                      | 32 (2.7)   | 20 (2.3)       | 12 (4.0)    | 0.13  |
| 8  | EMS Vital sign assessment            |            |                |             |       |
| 9  |                                      | 130 (109-  |                | 131 (115-   |       |
| 10 | SBP, mmHg                            | 150)       | 130 (104-146)  | 150)        | <0.01 |
| 11 | Missing                              | 65 (5.6)   | 56 (6.5)       | 9 (3.0)     | 0.02  |
| 12 | DBP, mmHg                            | 80 (70-91) | 80 (69-90)     | 80 (70-92)  | <0.01 |
| 13 | Missing                              | 75 (6.4)   | 65 (7.5)       | 10 (3.3)    | 0.01  |
| 14 | HR, /min                             | 86 (75-99) | 86 (74-99)     | 86 (76-100) | <0.01 |
| 15 | Missing                              | 31 (2.7)   | 28 (3.2)       | 3 (1.0)     | 0.04  |
| 16 | RR, /min                             | 18 (16-20) | 18 (16-20)     | 18 (16-20)  | <0.01 |
| 17 | Missing                              | 36 (3.1)   | 33 (3.8)       | 3 (1.0)     | 0.01  |
| 18 | SpO2, %                              | 98 (95-99) | 98 (95-99)     | 98 (96-99)  | <0.01 |
| 19 | Missing                              | 38 (3.3)   | 33 (3.8)       | 5 (1.7)     | 0.07  |
| 20 | Temperature, °C                      | 36.5 (36-  |                | 36.5 (36-   |       |
| 21 |                                      | 36.8)      | 36.5 (36-36.8) | 36.7)       | <0.01 |
| 22 | Missing                              | 94 (8.0)   | 65 (7.5)       | 29 (9.6)    | 0.25  |
| 23 | AVPU scale                           |            |                |             | <0.01 |
| 24 | Alert                                | 714 (61.1) | 504 (58.1)     | 210 (69.5)  |       |
| 25 | Verbal                               | 168 (14.4) | 136 (15.7)     | 32 (10.6)   |       |
| 26 | Pain                                 | 199 (17.0) | 158 (18.2)     | 41 (13.6)   |       |
| 27 | Unresponsive                         | 88 (7.5)   | 69 (8.0)       | 19 (6.3)    |       |
| 28 | Abnormal light reflex                | 165 (14.1) | 132 (15.2)     | 33 (10.9)   | <0.01 |
| 29 | Missing                              | 66 (5.6)   | 57 (6.6)       | 9 (3.0)     |       |
| 30 | GCS scale component                  |            |                |             |       |
| 31 | Glasgow coma scale eye               |            |                |             | <0.01 |
| 32 | 4                                    | 558 (47.7) | 380 (43.8)     | 178 (58.9)  |       |
| 33 | 3                                    | 128 (10.9) | 109 (12.6)     | 19 (6.3)    |       |
| 34 | 2                                    | 110 (9.4)  | 82 (9.5)       | 28 (9.3)    |       |
| 35 | 1                                    | 174 (14.9) | 141 (16.3)     | 33 (10.9)   |       |
| 36 | Unknown                              | 199 (17.0) | 155 (17.9)     | 44 (14.6)   |       |
| 37 | Glasgow coma scale Verbal            |            |                |             | 0.01  |
| 38 | 5                                    | 520 (44.5) | 359 (41.4)     | 161 (53.3)  |       |
| 39 | 4                                    | 118 (10.1) | 88 (10.1)      | 30 (9.9)    |       |
| 40 | 3                                    | 25 (2.1)   | 19 (2.2)       | 6 (2.0)     |       |
| 41 | 2                                    | 132 (11.3) | 105 (12.1)     | 27 (8.9)    |       |
| 42 | 1                                    | 174 (14.9) | 141 (16.3)     | 33 (10.9)   |       |
| 43 | Unknown                              | 200 (17.1) | 155 (17.9)     | 45 (14.9)   |       |
| 44 | Glasgow coma scale Motor             |            |                |             | <0.01 |
| 45 | 6                                    | 499 (42.7) | 333 (38.4)     | 166 (55.0)  |       |
| 46 | 5                                    | 124 (10.6) | 103 (11.9)     | 21 (7.0)    |       |
| 47 | 4                                    | 158 (13.5) | 123 (14.2)     | 35 (11.6)   |       |
| 48 | 3                                    | 47 (4.0)   | 39 (4.5)       | 8 (2.6)     |       |
| 49 | 2                                    | 17 (1.5)   | 15 (1.7)       | 2 (0.7)     |       |
| 50 | 1                                    | 125 (10.7) | 99 (11.4)      | 26 (8.6)    |       |
| 51 | Unknown                              | 199 (17.0) | 155 (17.9)     | 44 (14.6)   |       |
| 52 |                                      |            |                |             |       |
| 53 |                                      |            |                |             |       |
| 54 |                                      |            |                |             |       |
| 55 |                                      |            |                |             |       |
| 56 |                                      |            |                |             |       |
| 57 |                                      |            |                |             |       |
| 58 |                                      |            |                |             |       |
| 59 |                                      |            |                |             |       |
| 60 |                                      |            |                |             |       |



|    |                                         |            |            |            |       |
|----|-----------------------------------------|------------|------------|------------|-------|
| 1  |                                         |            |            |            |       |
| 2  |                                         |            |            |            |       |
| 3  |                                         |            |            |            |       |
| 4  |                                         |            |            |            |       |
| 5  | EMS management                          |            |            |            |       |
| 6  | Intravenous route                       | 176 (15.1) | 129 (14.9) | 47 (15.6)  | 0.77  |
| 7  | Hemorrhage control                      | 586 (50.1) | 426 (49.1) | 160 (53.0) | 0.25  |
| 8  | Spinal motion restriction               | 811 (69.4) | 606 (69.9) | 205 (67.9) | 0.51  |
| 9  | Advanced airway management              | 4 (0.3)    | 2 (0.2)    | 2 (0.7)    | 0.28  |
| 10 | Oxygen supply                           | 233 (19.9) | 176 (20.3) | 57 (18.9)  | 0.59  |
| 11 |                                         |            |            |            |       |
| 12 | Field triage decision scheme criteria*  |            |            |            |       |
| 13 | Physiological criteria                  |            |            |            |       |
| 14 | SBP<90 mmHg                             | 58 (5.0)   | 42 (4.8)   | 16 (5.3)   | 0.75  |
| 15 | RR<10 or >29 /min                       | 11 (0.9)   | 11 (1.3)   | 0 (0.0)    | 0.08  |
| 16 | Non-Alert                               | 429 (36.7) | 343 (39.6) | 86 (28.5)  | <0.01 |
| 17 |                                         |            |            |            |       |
| 18 | Anatomic criteria                       |            |            |            |       |
| 19 | All penetrating injuries to head, neck, |            |            |            |       |
| 20 | torso and extremities proximal to elbow |            |            |            |       |
| 21 | or knee                                 | 34 (2.9)   | 23 (2.7)   | 11 (3.6)   | 0.38  |
| 22 | Chest wall instability or deformity     | 4 (0.3)    | 4 (0.5)    | 0 (0.0)    | 0.58  |
| 23 | Two or more proximal long bone          |            |            |            |       |
| 24 | fractures                               | 19 (1.6)   | 13 (1.5)   | 6 (2.0)    | 0.60  |
| 25 | Crush, degloved, mangled or             |            |            |            |       |
| 26 | pulseless extremity                     | 15 (1.3)   | 13 (1.5)   | 2 (0.7)    | 0.38  |
| 27 | Amputation proximal to wrist or ankle   | 9 (0.8)    | 9 (1.0)    | 0 (0.0)    | 0.12  |
| 28 | Pelvic fractures                        | 8 (0.7)    | 6 (0.7)    | 2 (0.7)    | >0.95 |
| 29 | Open or depressed skull fracture        | 17 (1.5)   | 9 (1.0)    | 8 (2.6)    | 0.05  |
| 30 | Paralysis                               | 21 (1.8)   | 11 (1.3)   | 10 (3.3)   | 0.02  |
| 31 |                                         |            |            |            |       |
| 32 | Mechanism of injury criteria            |            |            |            |       |
| 33 | Fall > 6 meter                          | 113 (9.7)  | 84 (9.7)   | 29 (9.6)   | >0.95 |
| 34 |                                         |            |            |            |       |
| 35 | High-risk auto crash                    | 96 (8.2)   | 73 (8.4)   | 23 (7.6)   | 0.66  |
| 36 | Auto vs pedestrian/bicyclist thrown,    |            |            |            |       |
| 37 | run over, or with significant (>30km/h) |            |            |            |       |
| 38 | impact                                  | 119 (10.2) | 83 (9.6)   | 36 (11.9)  | 0.25  |
| 39 | Motorcycle crash > 30 km/hour           | 105 (9.0)  | 70 (8.1)   | 35 (11.6)  | 0.07  |
| 40 |                                         |            |            |            |       |
| 41 | ED disposition                          |            |            |            | 0.11  |
| 42 | Discharge                               | 320 (27.4) | 241 (27.8) | 79 (26.2)  |       |
| 43 | Transfer                                | 444 (38.0) | 316 (36.4) | 128 (42.4) |       |
| 44 | Admitted                                | 366 (31.3) | 276 (31.8) | 90 (29.8)  |       |
| 45 |                                         |            |            |            |       |
| 46 | In-hospital mortality                   | 90 (7.7)   | 74 (8.5)   | 16 (5.3)   | 0.07  |
| 47 |                                         |            |            |            |       |
| 48 | Outcomes                                |            |            |            |       |
| 49 | TBI                                     | 281 (24.0) | 215 (24.8) | 66 (21.9)  | 0.30  |
| 50 | TBI with intracranial injury            | 251 (21.5) | 195 (22.5) | 56 (18.5)  | 0.15  |
| 51 | TBI-related non-discharge               | 249 (21.3) | 192 (22.1) | 57 (18.9)  | 0.23  |
| 52 |                                         |            |            |            |       |
| 53 | TBI-related death                       | 43 (3.7)   | 32 (3.7)   | 11 (3.6)   | >0.95 |

\*EMS providers check specific criteria orderly from physiologic, anatomical, and mechanism of injury. If the preceding criteria are satisfied, the information of the latter criteria is not collected.

1  
2  
3  
4 IQR, interquartile range; SBP, systolic blood pressure; RR, respiratory rate; ED, emergency department; TBI,  
5  
6 traumatic brain injury.  
7  
8  
9  
10  
11  
12  
13  
14  
15  
16  
17  
18  
19  
20  
21  
22  
23  
24  
25  
26  
27  
28  
29  
30  
31  
32  
33  
34  
35  
36  
37  
38  
39  
40  
41  
42  
43  
44  
45  
46  
47  
48  
49  
50  
51  
52  
53  
54  
55  
56  
57  
58  
59  
60

For peer review only

Supplementary Table 3. Hyperparameters of the final prediction models\*

| Model                     | Outcome | Hyperparameters                                                                                                                           |
|---------------------------|---------|-------------------------------------------------------------------------------------------------------------------------------------------|
| Elastic net               | TBI     | alpha: 0.325, lambda: 0.07506346                                                                                                          |
|                           | TBI-I   | alpha: 0.325, lambda: 0.07506346                                                                                                          |
|                           | TBI-ND  | alpha: 0.325, lambda: 0.07017153                                                                                                          |
|                           | TBI-D   | alpha: 0.325, lambda: 0.01565599                                                                                                          |
| Random forest             | TBI     | ntree:500, mtry: 18                                                                                                                       |
|                           | TBI-I   | ntree:500, mtry: 18                                                                                                                       |
|                           | TBI-ND  | ntree:500, mtry: 18                                                                                                                       |
|                           | TBI-D   | ntree:500, mtry: 15                                                                                                                       |
| Support vector machine    | TBI     | sigma: 0.008047; C: 4                                                                                                                     |
|                           | TBI-I   | sigma: 0.008047; C: 4                                                                                                                     |
|                           | TBI-ND  | sigma: 0.008047; C: 4                                                                                                                     |
|                           | TBI-D   | sigma: 0.008047; C: 4                                                                                                                     |
| Extreme gradient boosting | TBI     | nrounds: 299; max_depth: 1; eta: 0.4807096; gamma: 2.336623;<br>colsample_bytree: 0.3657893; min_child_weight: 8; subsample:<br>0.8182623 |
|                           | TBI-I   | nrounds: 299; max_depth: 1; eta: 0.4807096; gamma: 2.336623;<br>colsample_bytree: 0.3657893; min_child_weight: 8; subsample:<br>0.8182623 |
|                           | TBI-ND  | nrounds: 301; max_depth: 1; eta: 0.02154674; gamma: 4.696105;<br>colsample_bytree: 0.590754; min_child_weight: 1; subsample:<br>0.5070866 |
|                           | TBI-D   | nrounds: 50; max_depth: 0.3; eta: 0.3; gamma: 0;<br>colsample_bytree: 0.8; min_child_weight: 1; subsample:<br>0.5510204                   |

\*Aside from the hyperparameters mentioned, all other hyperparameters are used as the default value.

TBI, traumatic brain injury; TBI-I, TBI with intracranial hemorrhage or injury; TBI-ND, TBI non-discharge; TBI-D, TBI with death.

Supplementary Figure 1. Receiver operating characteristics of prediction models according to outcomes. TBI, traumatic brain injury; TBI-I, TBI with intracranial hemorrhage or injury; TBI-ND, TBI non-discharge; TBI-D, TBI with death.



Supplementary Figure 2. Precision-recall curve of prediction models according to outcomes. TBI, traumatic brain injury; TBI-I, TBI with intracranial hemorrhage or injury; TBI-ND, TBI non-discharge; TBI-D, TBI with death; LR, logistic regression analysis; XGB, extreme gradient boosting; RF, random forest, EN, elastic net.

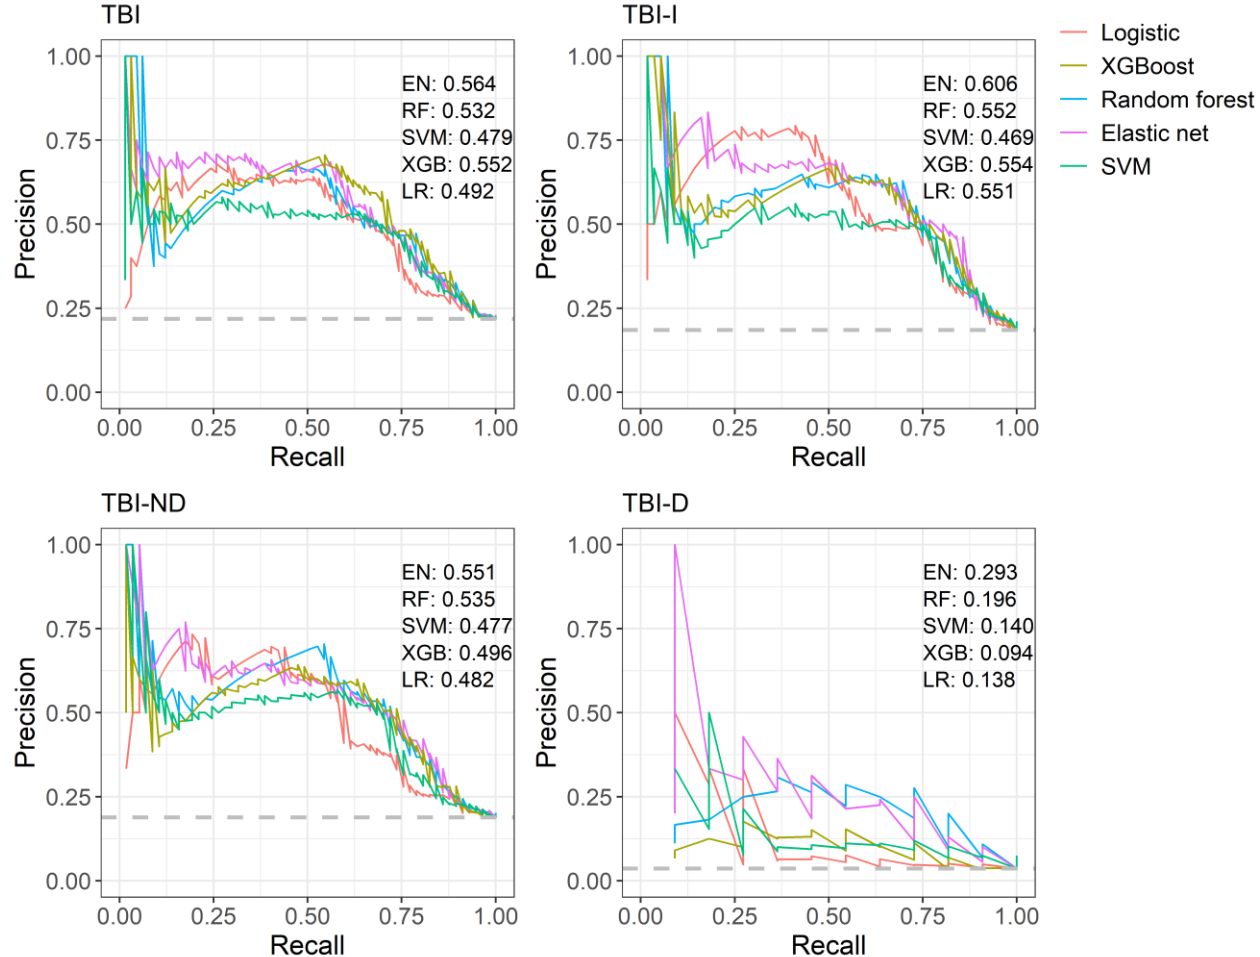

1  
2  
3  
4  
5  
6  
7  
8  
9  
10  
11  
12  
13  
14  
15  
16  
17  
18  
19  
20  
21  
22  
23  
24  
25  
26  
27  
28  
29  
30  
31  
32  
33  
34  
35  
36  
37  
38  
39  
40  
41  
42  
43  
44  
45  
46

Supplementary Figure 3. Calibration plot of prediction models according to outcomes. TBI, traumatic brain injury; TBI-I, TBI with intracranial hemorrhage or injury; TBI-ND, TBI non-discharge; TBI-D, TBI with death; p, p-value of Hosmer-Lemeshow test; BS, scaled Brier score.



1  
2  
3  
4  
5  
6  
7  
8  
9  
10  
11  
12  
13  
14  
15  
16  
17  
18  
19  
20  
21  
22  
23  
24  
25  
26  
27  
28  
29  
30  
31  
32  
33  
34  
35  
36  
37  
38  
39  
40  
41  
42  
43  
44  
45  
46

For peer review only

Supplementary Table 4. Example of calculating false-positive patients for accurately identified patients. TBI, traumatic brain injury; EN, elastic net.

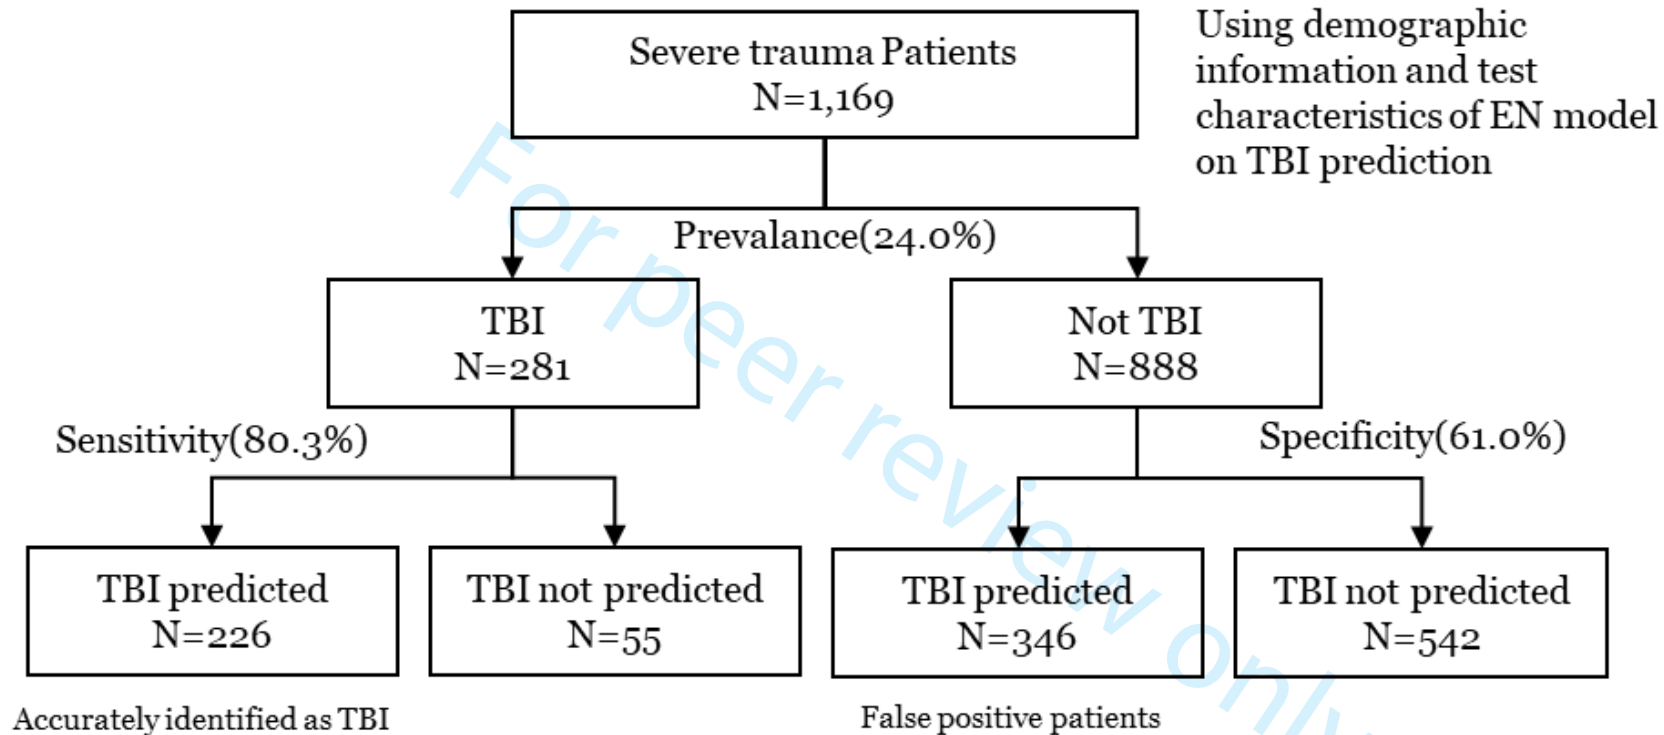

False-positive patients for every 10 patients that are accurately identified as TBI :  
 $346/226 \times 10 = 15.3$ , rounded up to 16 patients



## TRIPOD Checklist: Prediction Model Development and Validation

| Section/Topic                | Item | Checklist Item | Page                                                                                                                                                                                                  |       |
|------------------------------|------|----------------|-------------------------------------------------------------------------------------------------------------------------------------------------------------------------------------------------------|-------|
| <b>Title and abstract</b>    |      |                |                                                                                                                                                                                                       |       |
| Title                        | 1    | D;V            | Identify the study as developing and/or validating a multivariable prediction model, the target population, and the outcome to be predicted.                                                          | 1     |
| Abstract                     | 2    | D;V            | Provide a summary of objectives, study design, setting, participants, sample size, predictors, outcome, statistical analysis, results, and conclusions.                                               | 4     |
| <b>Introduction</b>          |      |                |                                                                                                                                                                                                       |       |
| Background and objectives    | 3a   | D;V            | Explain the medical context (including whether diagnostic or prognostic) and rationale for developing or validating the multivariable prediction model, including references to existing models.      | 7     |
|                              | 3b   | D;V            | Specify the objectives, including whether the study describes the development or validation of the model or both.                                                                                     | 8     |
| <b>Methods</b>               |      |                |                                                                                                                                                                                                       |       |
| Source of data               | 4a   | D;V            | Describe the study design or source of data (e.g., randomized trial, cohort, or registry data), separately for the development and validation data sets, if applicable.                               | 8-9   |
|                              | 4b   | D;V            | Specify the key study dates, including start of accrual; end of accrual; and, if applicable, end of follow-up.                                                                                        | 9     |
| Participants                 | 5a   | D;V            | Specify key elements of the study setting (e.g., primary care, secondary care, general population) including number and location of centres.                                                          | 8-9   |
|                              | 5b   | D;V            | Describe eligibility criteria for participants.                                                                                                                                                       | 10    |
|                              | 5c   | D;V            | Give details of treatments received, if relevant.                                                                                                                                                     | N/A   |
| Outcome                      | 6a   | D;V            | Clearly define the outcome that is predicted by the prediction model, including how and when assessed.                                                                                                | 10-11 |
|                              | 6b   | D;V            | Report any actions to blind assessment of the outcome to be predicted.                                                                                                                                | N/A   |
| Predictors                   | 7a   | D;V            | Clearly define all predictors used in developing or validating the multivariable prediction model, including how and when they were measured.                                                         | 11    |
|                              | 7b   | D;V            | Report any actions to blind assessment of predictors for the outcome and other predictors.                                                                                                            | N/A   |
| Sample size                  | 8    | D;V            | Explain how the study size was arrived at.                                                                                                                                                            | 14    |
| Missing data                 | 9    | D;V            | Describe how missing data were handled (e.g., complete-case analysis, single imputation, multiple imputation) with details of any imputation method.                                                  | 11    |
| Statistical analysis methods | 10a  | D              | Describe how predictors were handled in the analyses.                                                                                                                                                 | 11    |
|                              | 10b  | D              | Specify type of model, all model-building procedures (including any predictor selection), and method for internal validation.                                                                         | 11-12 |
|                              | 10c  | V              | For validation, describe how the predictions were calculated.                                                                                                                                         | 12-13 |
|                              | 10d  | D;V            | Specify all measures used to assess model performance and, if relevant, to compare multiple models.                                                                                                   | 12-13 |
|                              | 10e  | V              | Describe any model updating (e.g., recalibration) arising from the validation, if done.                                                                                                               | N/A   |
| Risk groups                  | 11   | D;V            | Provide details on how risk groups were created, if done.                                                                                                                                             | N/A   |
| Development vs. validation   | 12   | V              | For validation, identify any differences from the development data in setting, eligibility criteria, outcome, and predictors.                                                                         | 12    |
| <b>Results</b>               |      |                |                                                                                                                                                                                                       |       |
| Participants                 | 13a  | D;V            | Describe the flow of participants through the study, including the number of participants with and without the outcome and, if applicable, a summary of the follow-up time. A diagram may be helpful. | 14    |
|                              | 13b  | D;V            | Describe the characteristics of the participants (basic demographics, clinical features, available predictors), including the number of participants with missing data for predictors and outcome.    | 14    |
|                              | 13c  | V              | For validation, show a comparison with the development data of the distribution of important variables (demographics, predictors and outcome).                                                        | 14    |
| Model development            | 14a  | D              | Specify the number of participants and outcome events in each analysis.                                                                                                                               | 14    |
|                              | 14b  | D              | If done, report the unadjusted association between each candidate predictor and outcome.                                                                                                              | N/A   |
| Model specification          | 15a  | D              | Present the full prediction model to allow predictions for individuals (i.e., all regression coefficients, and model intercept or baseline survival at a given time point).                           | N/A   |
|                              | 15b  | D              | Explain how to use the prediction model.                                                                                                                                                              | 14-15 |
| Model performance            | 16   | D;V            | Report performance measures (with CIs) for the prediction model.                                                                                                                                      | 14-15 |
| Model-updating               | 17   | V              | If done, report the results from any model updating (i.e., model specification, model performance).                                                                                                   | N/A   |
| <b>Discussion</b>            |      |                |                                                                                                                                                                                                       |       |
| Limitations                  | 18   | D;V            | Discuss any limitations of the study (such as nonrepresentative sample, few events per predictor, missing data).                                                                                      | 19-20 |
| Interpretation               | 19a  | V              | For validation, discuss the results with reference to performance in the development data, and any other validation data.                                                                             | 16-17 |
|                              | 19b  | D;V            | Give an overall interpretation of the results, considering objectives, limitations, results from similar studies, and other relevant evidence.                                                        | 16    |
| Implications                 | 20   | D;V            | Discuss the potential clinical use of the model and implications for future research.                                                                                                                 | 18-19 |
| <b>Other information</b>     |      |                |                                                                                                                                                                                                       |       |
| Supplementary information    | 21   | D;V            | Provide information about the availability of supplementary resources, such as study protocol, Web calculator, and data sets.                                                                         | Suppl |
| Funding                      | 22   | D;V            | Give the source of funding and the role of the funders for the present study.                                                                                                                         | 20    |

\*Items relevant only to the development of a prediction model are denoted by D, items relating solely to a validation of a prediction model are denoted by V, and items relating to both are denoted D;V. We recommend using the TRIPOD Checklist in conjunction with the TRIPOD Explanation and Elaboration document.

# BMJ Open

## Development and validation of a prehospital-stage prediction tool for traumatic brain injury: a multicentre retrospective cohort study in Korea

|                                 |                                                                                                                                                                                                                                                                                                                                                                                                                                                                                                                                                                                                                                                                                                                                                                                                                                                                                                                                                                                                                                                                                                                                                                   |
|---------------------------------|-------------------------------------------------------------------------------------------------------------------------------------------------------------------------------------------------------------------------------------------------------------------------------------------------------------------------------------------------------------------------------------------------------------------------------------------------------------------------------------------------------------------------------------------------------------------------------------------------------------------------------------------------------------------------------------------------------------------------------------------------------------------------------------------------------------------------------------------------------------------------------------------------------------------------------------------------------------------------------------------------------------------------------------------------------------------------------------------------------------------------------------------------------------------|
| Journal:                        | <i>BMJ Open</i>                                                                                                                                                                                                                                                                                                                                                                                                                                                                                                                                                                                                                                                                                                                                                                                                                                                                                                                                                                                                                                                                                                                                                   |
| Manuscript ID                   | bmjopen-2021-055918.R2                                                                                                                                                                                                                                                                                                                                                                                                                                                                                                                                                                                                                                                                                                                                                                                                                                                                                                                                                                                                                                                                                                                                            |
| Article Type:                   | Original research                                                                                                                                                                                                                                                                                                                                                                                                                                                                                                                                                                                                                                                                                                                                                                                                                                                                                                                                                                                                                                                                                                                                                 |
| Date Submitted by the Author:   | 16-Dec-2021                                                                                                                                                                                                                                                                                                                                                                                                                                                                                                                                                                                                                                                                                                                                                                                                                                                                                                                                                                                                                                                                                                                                                       |
| Complete List of Authors:       | Choi, Yeong Ho; Seoul National University Hospital, Emergency Department; Seoul National University Hospital Biomedical Research Institute, Laboratory of Emergency Medical Services<br>Park, Jeong Ho; Seoul National University Hospital, Emergency Department; Seoul National University Hospital Biomedical Research Institute, Laboratory of Emergency Medical Services<br>Hong, Ki Jeong; Seoul National University Hospital, Emergency Medicine; Seoul National University Hospital Biomedical Research Institute, Laboratory of Emergency Medical Services<br>Ro, Young Sun; Seoul National University Hospital, Emergency Medicine; Seoul National University Hospital Biomedical Research Institute, Laboratory of Emergency Medical Services<br>Song, Kyoung Jun; Seoul Metropolitan Boramae Hospital, Department of Emergency Medicine; Seoul National University Hospital Biomedical Research Institute, Laboratory of Emergency Medical Services<br>Shin, Sang Do; Seoul National University Hospital, Department of Emergency Medicine; Seoul National University Hospital Biomedical Research Institute, Laboratory of Emergency Medical Services |
| <b>Primary Subject Heading</b>: | Emergency medicine                                                                                                                                                                                                                                                                                                                                                                                                                                                                                                                                                                                                                                                                                                                                                                                                                                                                                                                                                                                                                                                                                                                                                |
| Secondary Subject Heading:      | Emergency medicine, Health informatics                                                                                                                                                                                                                                                                                                                                                                                                                                                                                                                                                                                                                                                                                                                                                                                                                                                                                                                                                                                                                                                                                                                            |
| Keywords:                       | ACCIDENT & EMERGENCY MEDICINE, Neurological injury < NEUROLOGY, Trauma management < ORTHOPAEDIC & TRAUMA SURGERY                                                                                                                                                                                                                                                                                                                                                                                                                                                                                                                                                                                                                                                                                                                                                                                                                                                                                                                                                                                                                                                  |
|                                 |                                                                                                                                                                                                                                                                                                                                                                                                                                                                                                                                                                                                                                                                                                                                                                                                                                                                                                                                                                                                                                                                                                                                                                   |

SCHOLARONE™  
Manuscripts



I, the Submitting Author has the right to grant and does grant on behalf of all authors of the Work (as defined in the below author licence), an exclusive licence and/or a non-exclusive licence for contributions from authors who are: i) UK Crown employees; ii) where BMJ has agreed a CC-BY licence shall apply, and/or iii) in accordance with the terms applicable for US Federal Government officers or employees acting as part of their official duties; on a worldwide, perpetual, irrevocable, royalty-free basis to BMJ Publishing Group Ltd ("BMJ") its licensees and where the relevant Journal is co-owned by BMJ to the co-owners of the Journal, to publish the Work in this journal and any other BMJ products and to exploit all rights, as set out in our [licence](#).

The Submitting Author accepts and understands that any supply made under these terms is made by BMJ to the Submitting Author unless you are acting as an employee on behalf of your employer or a postgraduate student of an affiliated institution which is paying any applicable article publishing charge ("APC") for Open Access articles. Where the Submitting Author wishes to make the Work available on an Open Access basis (and intends to pay the relevant APC), the terms of reuse of such Open Access shall be governed by a Creative Commons licence – details of these licences and which [Creative Commons](#) licence will apply to this Work are set out in our licence referred to above.

Other than as permitted in any relevant BMJ Author's Self Archiving Policies, I confirm this Work has not been accepted for publication elsewhere, is not being considered for publication elsewhere and does not duplicate material already published. I confirm all authors consent to publication of this Work and authorise the granting of this licence.

1  
2  
3  
4 1 **Title page**  
5  
6  
7 2  
8

9 3 **1. Title**

10  
11 4 Development and validation of a prehospital-stage prediction tool for traumatic brain  
12  
13 5 injury: a multicentre retrospective cohort study in Korea  
14  
15  
16 6

17  
18 7 **2. Authors**

19  
20 8 Yeong Ho Choi, MD

21  
22 9 Department of Emergency Medicine, Seoul National University College of Medicine and  
23  
24 10 Hospital, Seoul, Republic of Korea

25  
26 11 Laboratory of Emergency Medical Services, Seoul National University Hospital

27  
28 12 Biomedical Research Institute, Seoul, Korea

29  
30 13 E-mail: d2uk87@gmail.com  
31  
32  
33  
34 14

35  
36 15 Jeong Ho Park, MD

37  
38 16 Department of Emergency Medicine, Seoul National University College of Medicine and  
39  
40 17 Hospital, Seoul, Republic of Korea

41  
42 18 Laboratory of Emergency Medical Services, Seoul National University Hospital

43  
44 19 Biomedical Research Institute, Seoul, Korea

45  
46 20 E-mail: timthe@gmail.com  
47  
48  
49  
50 21

51  
52 22 Ki Jeong Hong, MD, PhD

53  
54 23 Department of Emergency Medicine, Seoul National University College of Medicine and  
55  
56 24 Hospital, Seoul, Republic of Korea  
57  
58  
59  
60

1  
2  
3  
4 25 Laboratory of Emergency Medical Services, Seoul National University Hospital  
5  
6 26 Biomedical Research Institute, Seoul, Korea  
7  
8  
9 27 E-mail: emkjhong@gmail.com  
10  
11 28  
12  
13 29 Young Sun Ro, MD, DrPH  
14  
15 30 Department of Emergency Medicine, Seoul National University College of Medicine and  
16  
17 31 Hospital, Seoul, Republic of Korea  
18  
19 32 Laboratory of Emergency Medical Services, Seoul National University Hospital  
20  
21 33 Biomedical Research Institute, Seoul, Korea  
22  
23 34 E-mail: ro.youngsun@gmail.com  
24  
25 35  
26  
27 36 Kyoung Jun Song, MD, PhD  
28  
29 37 Department of Emergency Medicine, Seoul Metropolitan Government Seoul National  
30  
31 38 University Boramae Medical Center, Seoul, Republic of Korea  
32  
33 39 Laboratory of Emergency Medical Services, Seoul National University Hospital  
34  
35 40 Biomedical Research Institute, Seoul, Korea  
36  
37 41 E-mail: skciva@gmail.com  
38  
39 42  
40  
41 43 Sang Do Shin, MD, PhD  
42  
43 44 Department of Emergency Medicine, Seoul National University College of Medicine and  
44  
45 45 Hospital, Seoul, Republic of Korea  
46  
47 46 Laboratory of Emergency Medical Services, Seoul National University Hospital  
48  
49 47 Biomedical Research Institute, Seoul, Korea  
50  
51 48 E-mail: shinsangdo@gmail.com  
52  
53  
54  
55  
56  
57  
58  
59  
60

1  
2  
3  
4 495  
6 50 **3. Address correspondence and requests for reprints: Jeong Ho Park, MD**7  
8  
9 51 Address: Seoul National University Hospital, 101 Daehak-Ro, Jongno-Gu, Seoul 03080,10  
11 52 Korea12  
13 53 Phone: +82-2-2072-180014  
15 54 FAX: +82-2-741-785516  
17 55 E-mail: timthe@gmail.com18  
19  
20 5621  
22  
23 5724  
25 58  
26  
27  
28  
29  
30  
31  
32  
33  
34  
35  
36  
37  
38  
39  
40  
41  
42  
43  
44  
45  
46  
47  
48  
49  
50  
51  
52  
53  
54  
55  
56  
57  
58  
59  
60

1  
2  
3  
4 59 **Abstract**

6 60 **Objectives:** Predicting diagnosis and prognosis of traumatic brain injury (TBI) at the  
7  
8  
9 61 prehospital stage is challenging; however, using comprehensive prehospital information and  
10  
11 62 machine learning may improve the performance of the predictive model. We developed and  
12  
13 63 tested predictive models for TBI that use machine learning algorithms using information that  
14  
15  
16 64 can be obtained in the prehospital stage.

17  
18 65 **Design:** This was a multi-center retrospective study.

19  
20 66 **Setting and participants:** This study was conducted at three tertiary academic emergency  
21  
22 67 departments (EDs) located in an urban area of South Korea. The data from adult patients with  
23  
24 68 severe trauma who were assessed by emergency medical service (EMS) providers and  
25  
26  
27 69 transported to three participating hospitals between 2014 to 2018 were analyzed.

28  
29 70 **Results:** We developed and tested five machine learning algorithms—logistic regression  
30  
31 71 analyses, extreme gradient boosting, support vector machine, random forest, and elastic net  
32  
33 72 (EN)—to predict TBI, TBI with intracranial hemorrhage or injury (TBI-I), TBI with  
34  
35 73 emergency department or admission result of admission or transferred (TBI-ND), and TBI  
36  
37 74 with emergency department or admission result of death (TBI-D). A total of 1,169 patients  
38  
39 75 were included in the final analysis, and the proportions of TBI, TBI-I, TBI-ND, and TBI-D  
40  
41 76 were 24.0%, 21.5%, 21.3%, and 3.7%, respectively. The EN model yielded an AUROC of  
42  
43 77 0.799 for TBI, 0.844 for TBI-I, 0.811 for TBI-ND, and 0.871 for TBI-D. The EN model also  
44  
45 78 yielded the highest specificity, and significant reclassification improvement. Variables related  
46  
47 79 to loss of consciousness, Glasgow Coma Scale, and light reflex were the three most important  
48  
49 80 variables to predict all outcomes.

50  
51 81 **Conclusion:** Our results inform the diagnosis and prognosis of TBI. Machine learning  
52  
53 82 models resulted in significant performance improvement over that with logistic regression  
54  
55  
56  
57  
58  
59  
60

1  
2  
3  
4 83 analyses, and the best performing model was EN.  
5  
6

7 84

8  
9 85 **Keywords:** brain injuries; traumatic; outcome; prognosis; machine learning.  
10  
11

12 86  
13

14 87  
15  
16  
17  
18  
19  
20  
21  
22  
23  
24  
25  
26  
27  
28  
29  
30  
31  
32  
33  
34  
35  
36  
37  
38  
39  
40  
41  
42  
43  
44  
45  
46  
47  
48  
49  
50  
51  
52  
53  
54  
55  
56  
57  
58  
59  
60

For peer review only



1  
2  
3  
4 88 **Strengths and limitations of this study**

5  
6 89 • This study presented prehospital factors that could predict traumatic brain injury in trauma  
7  
8 90 patients chosen by model-specific metrics.

9  
10  
11 91 • We treated the missing variables as a different category, reflecting prehospital field  
12  
13 92 uncertainties and increasing data utilization.

14  
15 93 • The retrospective observational study design could lead to certain types of bias (eg,  
16  
17 94 selection bias, confounding bias).

18  
19  
20 95 • External validation for other areas should be conducted to generalize the developed  
21  
22 96 prediction model.

23  
24  
25 97  
26  
27  
28  
29  
30  
31  
32  
33  
34  
35  
36  
37  
38  
39  
40  
41  
42  
43  
44  
45  
46  
47  
48  
49  
50  
51  
52  
53  
54  
55  
56  
57  
58  
59  
60

## 98 **Introduction**

99 Traumatic brain injury (TBI) is a significant health burden worldwide.<sup>1</sup> It is the leading cause  
100 of mortality and disability among young individuals.<sup>2</sup> Patients with TBI are vulnerable to  
101 hypoxia and hypotension in the early period of their course and these insults are associated  
102 with poor outcomes.<sup>3 4</sup> Prehospital assessment and management of patients with TBI is  
103 important,<sup>5</sup> as early prediction of TBI and correcting hypoxia and hypotension during the  
104 prehospital stage could be beneficial.<sup>3</sup> However, the identification of TBI can often be  
105 challenging in the prehospital area.<sup>5</sup> Vulnerable patients, including the elderly or patients who  
106 take medications like anti-platelet or anticoagulant drugs, often have TBI owing to low  
107 energy insults.<sup>6</sup> Prehospital clinical signs are also reported to have poor sensitivity for raised  
108 intracranial pressure following TBI.<sup>7</sup>

109 Several prediction models to target patients with TBI have been reported.<sup>8-12</sup>  
110 However, most incorporated information that is available only in the hospital, such as  
111 laboratory results or image findings.<sup>8 9 13</sup> In addition, most previous prediction models  
112 focused on the outcomes of patients with TBI,<sup>14-16</sup> not the identification of TBI. Previously,  
113 predictors of older adult patients with TBI who required transport to a trauma center were  
114 identified. However, this was consensus-based; therefore, there is a lack of clinical data.<sup>17</sup>  
115 Accurate prehospital prediction of TBI and its severity could prevent delays to definite care  
116 for patients with TBI. Most emergency medical service (EMS) providers collect various  
117 information including demographics, past medical history, circumstances of the trauma, and  
118 clinical signs including vital signs; but those variables have not been evaluated together as  
119 predictors of TBI and its severity. Using a variety of prehospital information, and adapting  
120 newly emerging machine learning algorithms for predicting diagnosis, disposition, and  
121 outcome of TBI, might improve the accuracy of identification of TBI and its severity.

1  
2  
3  
4 122 The aim of this study was to develop and test prediction models for the diagnosis and  
5  
6 123 prognosis of TBI using prehospital information and machine learning algorithms among  
7  
8 124 patients with severe trauma. We hypothesized that incorporating prehospital information  
9  
10 125 could achieve acceptable performance in predicting TBI, and machine learning algorithms  
11  
12 126 could contribute to performance improvement.  
13  
14  
15  
16

## 17 127 **Materials and Methods**

### 18 19 20 128 *Study design and settings*

21  
22  
23 129 This was a multi-center retrospective study conducted at three tertiary academic emergency  
24  
25 130 departments (EDs) located in an urban area (Seoul and Bundang) of South Korea. These EDs  
26  
27 131 received 50,000–90,000 visits annually and are not designated trauma centers. We adhered to  
28  
29 132 the Transparent Reporting of a Multivariable Prediction Model for Individual Prognosis or  
30  
31 133 Diagnosis (TRIPOD) statement on reporting predictive models.<sup>18</sup>  
32  
33

34 134 The EMS system in South Korea is operated by the National Fire Agency. The EMS  
35  
36 135 level is considered intermediate, as EMS providers can perform bleeding control, spinal  
37  
38 136 motion restriction, immobilization and splintage, advanced airway management, and  
39  
40 137 administer fluid intravenously. As only physicians can declare death in South Korea, EMS  
41  
42 138 providers cannot stop resuscitation and must transport all patients including those in cardiac  
43  
44 139 arrest to the ED. For all EMS transport, EMS providers record an ambulance run-sheet by  
45  
46 140 law. Since 2012, the National Fire Agency adapted the United States Centers for Disease  
47  
48 141 Control and Prevention of the United States field triage decision scheme to evaluate patients  
49  
50 142 with trauma,<sup>19</sup> and they developed an EMS severe trauma in-depth registry. For said patients,  
51  
52 143 EMS providers evaluate whether patients met trauma center transport criteria in the field  
53  
54 144 triage decision scheme. If they did, the in-depth registry should be recorded, and EMS  
55  
56  
57  
58  
59  
60

1  
2  
3  
4 145 transport protocol recommends that patients are transferred to a near regional trauma center;  
5  
6 146 but it is not mandatory.  
7

8  
9 147 The Ministry of Health and Welfare designated three ED levels according to the  
10  
11 148 resources and functional requirements; level 1 (n = 36) and level 2 (n = 118) EDs have more  
12  
13 149 resources and better facilities for emergency care and must be staffed by emergency  
14  
15 150 physicians 24 hours a day/365 days a year; whereas level 3 EDs (n = 248) can be staffed by  
16  
17 151 general physicians. In accordance with the EMS Act, all EDs participated annually in a  
18  
19 152 nationwide functional performance evaluation program, which was administered by the  
20  
21 153 Ministry of Health and Welfare. The three participating hospitals in this study were all level 1  
22  
23 154 EDs that can perform acute trauma care for patients with TBI 24 hours a day/365 days a  
24  
25 155 year—including emergency neurosurgical operation and angiographic interventions. The  
26  
27 156 Ministry of Health and Welfare also designated trauma centers in Korea. Total 16 trauma  
28  
29 157 centers were designated as trauma centers in 2018. Among them, 15 were Level I EDs.  
30  
31  
32  
33  
34

### 35 158 ***Data source***

36  
37  
38 159 We used an EMS ambulance run-sheet, EMS trauma in-depth registry, and ED administrative  
39  
40 160 database. The EMS database information, including ambulance run-sheet and trauma in-depth  
41  
42 161 registry, was collected electronically by EMS providers using tablets. The EMS record  
43  
44 162 review for each severe trauma has been performed by EMS medical directors of each fire  
45  
46 163 department since 2012. The ED administrative database contains patients' demographic  
47  
48 164 characteristics, route of visit, time of visit, and diagnosis and disposition. We merged the  
49  
50 165 EMS database with the ED administrative database based on patients' arrival time, age, and  
51  
52 166 sex.  
53  
54  
55  
56  
57  
58  
59  
60

1  
2  
3  
4 167 ***Study population***  
5

6  
7 168 We included adult (age  $\geq 15$ ) EMS users who were transported to participating hospitals with  
8  
9 169 severe trauma from January 1, 2014 to December 31, 2018. Severe trauma was assessed by  
10  
11 170 EMS providers and defined as patients who fulfilled trauma center transport criteria  
12  
13 (physiologic criteria, anatomic criteria, mechanism of injury criteria, or special patients or  
14 171 system consideration criteria) in the field triage decision scheme.<sup>20</sup> Patients were excluded if  
15  
16 172 they had out-of-hospital cardiac arrest or their main cause of EMS call was medical or  
17  
18 173 nontraumatic injury including choking, drowning, fire, flame, heat, cold, poisoning, chemical,  
19  
20 174 sexual assault, weather, or natural disaster. Patients with an unknown outcome were also  
21  
22 175 excluded.  
23  
24  
25  
26  
27

28  
29 177 ***Outcome measure***  
30

31  
32 178 The primary outcome measure was the diagnosis of TBI. TBI diagnosis was defined as  
33  
34 179 patients whose diagnostic code, according to the International Statistical Classification of  
35  
36 180 Diseases and Related Health Problems (ICD-10), was between S06.0 and S06.9.<sup>21 22</sup>  
37  
38 181 Although S06.7 is codes for the duration of unconscious, we included S06.7 in our study  
39  
40 182 outcome according to the previous studies.<sup>21-23</sup> However, no patients only have S06.7 code  
41  
42 183 for TBI diagnosis in our study. The ED administrative database has two types of primary  
43  
44 184 diagnostic codes: the final diagnostic codes at ED discharge and at hospital discharge. We  
45  
46 185 extracted up to 20 codes for each. We defined the diagnostic code as positive for TBI if a  
47  
48 186 confirmative diagnostic code was found in any level of the discharge record. Because ICD 10  
49  
50 187 code is not directly linked to the severity of TBI, we further included a variety of additional  
51  
52 188 outcome measures to perform analysis that take into account severity. A secondary outcome  
53  
54 189 measure was TBI diagnosis with intracranial hemorrhage or injury (TBI-I), defined as TBI  
55  
56  
57  
58  
59  
60

1  
2  
3  
4 190 patients excluding concussion (ICD 10 code with S06.0). A tertiary outcome was TBI with  
5  
6 191 non-discharge (TBI-ND), defined as TBI patients excluding ED discharged patients. Because  
7  
8 192 TBI-ND patients needed further management by hospitalization or transfer, we thought that  
9  
10 193 this group of patients had clinically significant severity. A quaternary outcome measure was  
11  
12 194 TBI with death (TBI-D), defined as TBI patients who died in ED or hospital. Because TBI-D  
13  
14 195 patients are most severe group, TBI-D patients were also included in TBI-ND.  
15  
16  
17  
18

### 19 196 ***Variables and preprocessing***

20  
21  
22 197 We collected patients' demographic data, circumstances of trauma, chief complaints, EMS  
23  
24 198 vital sign assessment, EMS management and hospital outcomes. The detailed descriptions of  
25  
26 199 each variable are described in Supplementary Table 1. Categorical variables were  
27  
28 200 preprocessed with the one-hot encoding (dummy variable encoding) method. Continuous  
29  
30 201 variables were divided into four quantiles and unknown or missing values were categorized  
31  
32 202 as a fifth category. One-hot encoding was also applied to discretized continuous variables.  
33  
34 203 Preprocessing measures including discretization results of continuous variables are presented  
35  
36 204 in Supplementary Table 1.  
37  
38  
39  
40

### 41 42 ***Model development***

43  
44  
45 206 We developed prediction models for outcomes by using five machine learning algorithms:  
46  
47 207 traditional logistic regression analyses (LR), extreme gradient boost (XGB), random forest  
48  
49 208 (RF), support vector machine (SVM), and elastic net (EN). The LR algorithm was chosen as  
50  
51 209 baseline comparison algorithm because it is widely used in the medical field and has been  
52  
53 210 used for previous prediction model development in TBI studies.<sup>12</sup> Backward stepwise LR was  
54  
55 211 selected for feature selection, and we used the default parameter of stepAIC function from  
56  
57 212 MASS package (version 7.3-53.1) in R for the selection. The other four algorithms were  
58  
59  
60

1  
2  
3  
4 213 selected based on their ability to model nonlinear associations, their relative ease of  
5  
6 214 implementation, and their general acceptance in the machine learning community.<sup>24-26</sup> All  
7  
8  
9 215 algorithms have a method to calculate the probability of the outcome occurring and  
10  
11 216 algorithms other than LR need hyperparameter tuning for proper training and prediction.

12  
13 217 The study population was split into training cohorts that included development,  
14  
15 218 validation, and test cohorts. The development cohort included a training cohort from which  
16  
17 219 each of the machine learning prediction models were derived and a validation cohort in which  
18  
19 220 the prediction models were applied to adjust the hyperparameters of the algorithm. The test  
20  
21 221 cohort was used for the final evaluation of the performance of the prediction models.  
22  
23 222 Chronological split was used for data split. Patients enrolled from January 1, 2014 to  
24  
25 223 December 31, 2016 were used as the training cohort; patients from January 1, 2017 to  
26  
27 224 December 31, 2017 were used as the validation cohort; and patients from January 1, 2018 to  
28  
29 225 December 31, 2018 were used as the test cohort. Hyperparameter tuning using validation data  
30  
31 226 was conducted by, first, a random search within 10,000 randomly generated hyperparameters;  
32  
33 227 then, grid search hyperparameters chosen around from random search with five candidates  
34  
35 228 per each hyperparameter. Finally, hyperparameter with best area under receiver-operation  
36  
37 229 curve (AUROC) in validation cohorts were selected. Test data were separated during training  
38  
39 230 and tuning processes and used to measure algorithm performance.  
40  
41  
42  
43  
44  
45  
46

### 47 231 ***Statistical analysis***

48 232 The demographic findings and outcomes of the study population were described in this study.  
49  
50 233 Additionally, the baseline characteristics of the training cohort and the validation cohort were  
51  
52 234 compared. The continuous variables were compared by using Student's T-test or the  
53  
54 235 Wilcoxon rank sum test, and the categorical variables were compared by using the chi-  
55  
56 236 squared test or the Fisher exact test, as appropriate.  
57  
58  
59  
60

1  
2  
3  
4 237 We assessed discrimination performance by comparing the AUROC for each model  
5  
6 238 in the test cohort. We considered an AUROC of 0.5 as no discrimination, 0.7 to 0.8 as  
7  
8  
9 239 acceptable, 0.8 to 0.9 as excellent, and more than 0.9 is considered outstanding.<sup>27</sup> Area under  
10  
11 240 the precision-recall curve (AUPRC) was assessed for each model in the test cohort. We  
12  
13 241 assessed the calibration power by using the Hosmer–Lemeshow test, the scaled Brier score,  
14  
15 242 and a calibration plot in the test cohort. For the delineation of test characteristics, the  
16  
17 243 sensitivity, specificity, and positive and negative predictive values with 95% CIs were  
18  
19  
20 244 determined using a cutoff probability at a sensitivity of 80%. Given that poor sensitivity of  
21  
22 245 clinical predictors for TBI in previous studies,<sup>7</sup> and almost 75% sensitivity level for other  
23  
24 246 severe disease prediction in prehospital settings,<sup>28 29</sup> we thought that 80% sensitivity was an  
25  
26 247 appropriate target for our prediction model. We calculated false positive rate as 1 –  
27  
28  
29 248 specificity. The added prognostic power of each prediction model compared to the LR model  
30  
31 249 was also evaluated by continuous net reclassification index (NRI). NRI is a statistical method  
32  
33 250 to quantify how well a new model correctly reclassifies the study population with the other  
34  
35 251 models. Details of NRI are described elsewhere.<sup>30</sup>

36  
37  
38 252 By using a model-specific metric, the variable importance of each model was  
39  
40 253 assessed, except for the SVM algorithm. The variable importance was determined by the  
41  
42 254 coefficient effect sizes for the LR model. The XGB and RF models were ranked by variable  
43  
44 255 importance on the selection frequency of the variable as a decision node. The absolute value  
45  
46 256 of the coefficients corresponding to the tuned model were used for the measurement of  
47  
48 257 variable importance in the EN algorithm. To compare the variable importance of each  
49  
50  
51 258 prediction models efficiently, top 5 variables of each model was presented.  
52  
53  
54  
55  
56  
57  
58  
59  
60



1  
2  
3  
4 259 All statistical analyses were performed with R Statistical Software (version 4.0.1; R  
5  
6 260 Foundation for Statistical Computing, Vienna, Austria). Packages included caret, e1071,  
7  
8  
9 261 xgboost, randomForest, and glmnet for the analysis of the machine learning algorithms.  
10  
11

### 12 262 *Patient and public involvement*

13  
14 263 This research was done without patient involvement. Patients were not invited to comment on  
15  
16  
17 264 the study design and were not consulted to develop patient relevant outcomes or interpret the  
18  
19 265 results. Patients were not invited to contribute to the writing or editing of this document for  
20  
21 266 readability or accuracy.  
22  
23

24 267

## 25 26 27 268 **Result**

### 28 29 30 269 *Demographic findings*

31  
32  
33 270 Among the 157,134 EMS users transported to three hospitals from 2014 to 2018, 1,169  
34  
35 271 patients were included in the final analysis (Figure 1). Patients were split into 2 datasets: data  
36  
37 272 from 2014 to 2017, consisting of 867 patients (74.2%) in the development cohort; and the  
38  
39 273 remaining data from 2018 consisting of 302 patients (25.8%) in the test cohort (Figure 1).  
40  
41

42 274 Among the development cohort, data from 2014 to 2016—consisting of 661 patients—were  
43  
44 275 used as the training cohort, and 2017 data—consisting of 206 patients—were used as the  
45  
46 276 validation cohort in the model.  
47  
48

49 277 Table 1 shows key demographic findings of the development and test cohorts. Median  
50  
51 278 (IQR) age was 52 years (35–66) in the development cohort and 56 years (40–69) in the test  
52  
53 279 cohort. Traffic accident was most common mechanism of trauma (43.3% for the development  
54  
55 280 cohort and 41.4% for the test cohort). The proportion of patients with alert mental status was  
56  
57  
58  
59  
60

1  
2  
3  
4 281 58.1% for the development cohort and 69.5% in the test cohort. Overall, TBI, TBI-I, TBI-  
5  
6 282 ND, TBI-D occurred in 215 (24.8%), 195 (22.5%), 192 (22.1%), and 32 (3.7%) in the  
7  
8 283 development cohort; and 66 (21.9%), 56 (18.5%), 57 (18.9%), and 11 (3.6%) in the test  
9  
10 284 cohort. All demographic characteristics of the development and test cohorts are described in  
11  
12 285 Supplementary Table 2.

### 17 286 ***Main analysis***

20 287 The final hyperparameters of prediction models are described in Supplementary Table 3. The  
21  
22 288 discrimination and NRI of the prediction models on the test cohort are presented in Table 2.  
23  
24 289 The AUROC for outcomes were 0.770–0.806 for TBI, 0.820–0.844 for TBI-I, 0.767–0.811  
25  
26 290 for TBI-ND, and 0.664–0.889 for TBI-D (Table 2 and Supplementary Figure 1). Compared to  
27  
28 291 LR, XGB performed significantly well in predicting TBI, and RF and EN performed well in  
29  
30 292 predicting TBI-ND and TBI-D. EN model generally performed well on all outcomes. The  
31  
32 293 AUROC of the EN model for outcomes were 0.799 (95% CI: 0.732–0.867), 0.844 (95% CI:  
33  
34 294 0.779–0.910), 0.811 (95% CI: 0.741–0.882), and 0.871 (95% CI: 0.764–0.978) for TBI, TBI-  
35  
36 295 I, TBI-ND, and TBI-D, respectively. Machine learning models generally resulted in  
37  
38 296 significant reclassification improvement compared to LR for TBI, TBI-I, and TBI-ND. For  
39  
40 297 prediction TBI-D, AUROC difference, and reclassification improvement compared to LR  
41  
42 298 was non-significant in all machine learning models. The precision-recall curve is shown in  
43  
44 299 Supplementary Figure 2. AUPRC were 0.479–0.564 for TBI, 0.469–0.606 for TBI-I, 0.477–  
45  
46 300 0.551 for TBI-ND and 0.094–0.140 for TBI-D. EN model showed highest AUPRC among all  
47  
48 301 prediction models. Supplementary Figure 3 shows the calibration plot of prediction models  
49  
50 302 according to outcomes. All prediction models generally showed poor calibration. Given the  
51  
52 303 high AUROC and AUPRC among prediction models, and reclassification improvement  
53  
54  
55  
56  
57  
58  
59  
60

1  
2  
3  
4 304 compared to LR, we determined EN as a best-performing prediction model in our analysis.

5  
6 305 Using cutoff of 80% sensitivity, specificity was 47.5–68.2% for TBI, 71.1–81.3% for  
7  
8 306 TBI-I, 46.1–74.3% for TBI-ND, and 42.6–49.0 for TBI-D. EN showed the highest specificity  
9  
10  
11 307 and PPV among all outcomes. False positive rate (1 – specificity) was almost 19.7–39.0%  
12  
13 308 according to outcomes in the EN model. The 95% CI of specificity of the EN model was not  
14  
15 309 overlapped with LR in TBI, TBI-ND, and TBI-D predictions. NPV was almost 89–99% for  
16  
17  
18 310 all outcomes in the prediction models (Table 3).

19  
20 311 Table 4 shows the top 5 variable importance of prediction models according to  
21  
22 312 outcomes. Variables related to patients' symptom of loss of consciousness, Glasgow Coma  
23  
24 313 Scale component, and light reflex were the three most important variables to predict all  
25  
26 314 outcomes. Compared to other outcomes, the difference between variable importance for TBI-  
27  
28  
29 315 D was prominent, and the mechanism of injury, heart rate, and age showed the highest  
30  
31  
32 316 importance for predicting TBI-D.

## 33 34 35 317 **Discussion**

36  
37  
38 318 By using prehospital data from EMS users visiting three teaching hospitals, we developed  
39  
40 319 and validated prediction models for the diagnosis and prognosis of TBI using machine  
41  
42 320 learning algorithms among patients with severe trauma, identified by EMS providers in South  
43  
44 321 Korea. We found that 24% of patients were diagnosed with TBI, 22% showed intracranial  
45  
46 322 injury, 21% could not be discharged from the ED with a TBI diagnosis, and 4% showed TBI-  
47  
48  
49 323 related death. Machine learning models showed acceptable-to-excellent discrimination  
50  
51 324 performance (AUROCs were 0.799–0.871 according to outcomes in the best-performing EN  
52  
53 325 model). When identifying 80% of target patients with TBI, the false positive rate was almost  
54  
55  
56 326 19.7–39.0%. Consciousness status related variables ranging from patients' symptom to EMS  
57  
58  
59  
60

1  
2  
3  
4 327 providers' assessment showed the highest importance for predicting all outcomes. This study  
5  
6 328 adds considerably to the understanding of prehospital prediction performance of TBI among  
7  
8  
9 329 patients with severe trauma. Use of comprehensive prehospital information and certain  
10  
11 330 machine learning approaches led to increased performance with a diminished false positive  
12  
13 331 rate compared to those of the traditional statistical model.

14  
15 332 Several studies reported that EMS providers' assessment using prehospital  
16  
17 333 information is effective for the identification of patients with severe trauma who require  
18  
19 334 direct transport to a trauma center.<sup>31-33</sup> Because TBI accounts for a significant portion of  
20  
21 335 patients with severe trauma,<sup>32</sup> and the majority of patients have poor access to trauma  
22  
23 336 centers,<sup>34</sup> identification of TBI among patients with severe trauma by EMS providers could  
24  
25 337 contribute to proper prehospital management and destination hospital decisions.<sup>3</sup> However,  
26  
27 338 prehospital identification of TBI is challenging.<sup>35</sup> Prehospital clinical signs showed poor  
28  
29 339 predictive performance for differentiating patients with TBI.<sup>7</sup>, and previous prediction  
30  
31 340 models related to TBI mostly focused on TBI outcomes.<sup>8 9 13</sup> One study reported the  
32  
33 341 predictors for mild TBI with persistent symptoms; but a single-center case-control study  
34  
35 342 design and ED-based model development lacks applicability to prehospital settings.<sup>36</sup> In this  
36  
37 343 study, we developed and tested TBI prediction models that used prehospital information, and  
38  
39 344 we found acceptable discrimination power for the prediction of diagnosis and prognosis of  
40  
41 345 TBI. Uniquely, we incorporated various demographic variables, trauma circumstances,  
42  
43 346 patients' complaints, and EMS assessment information in the prediction models, and we  
44  
45 347 adapted the machine learning algorithms.

46  
47 348 When using a cutoff for 80% sensitivity for TBI detection, the false positive rate was  
48  
49 349 19.7–39.0% (Table 2). Those false positive rate levels are plausible for detecting severe  
50  
51 350 diseases in EMS settings. A previous study reported a 26% of false positive rate of EMS  
52  
53  
54  
55  
56  
57  
58  
59  
60

1  
2  
3  
4 351 triage for myocardial infarction with a sensitivity of 74% and 50% of false positive rate of  
5  
6 352 EMS recognition of stroke in sensitivity of 74%.<sup>28 29</sup> Considering the prevalence of outcomes  
7  
8 353 (24% in TBI, 22% in TBI-I, 21% in TBI-ND, and 4% in TBI-D; Table 1), there would be 16,  
9  
10 354 9, 12, and 67 false-positive patients for every 10 patients that are accurately identified as TBI,  
11  
12 355 TBI-I, TBI-ND, and TBI-D, respectively (Supplementary Table 4). Because of the low  
13  
14 356 prevalence of TBI-D, a similar specificity of the prediction model for outcomes resulted in a  
15  
16 357 very low positive predictive value and a high proportion of false positive cases, which  
17  
18 358 suggested the limited applicability of prediction models for TBI-D in prehospital settings.

19  
20 359       Consciousness-status-related variables ranging from patients' complaints to EMS  
21  
22 360 assessment showed the highest importance regardless of models and outcomes in our study.  
23  
24 361 Consciousness status is closely associated with head trauma. Head trauma can result in  
25  
26 362 structural brain injury or physiological disruption of brain function, which could result in  
27  
28 363 altered mental status.<sup>37</sup> Mental status is also associated with TBI severity,<sup>38</sup> and its  
29  
30 364 association with TBI outcomes have been reported.<sup>8 9 13</sup> History taking and physical  
31  
32 365 examination for altered mental status is key to early diagnosis and proper management of TBI  
33  
34 366 in prehospital settings.<sup>39</sup>

35  
36 367       We adapted machine learning algorithms for the prediction of TBI-related outcomes  
37  
38 368 and found an improvement in discrimination and an increase in specificity with the same  
39  
40 369 sensitivity thresholds. However, the LR model also showed acceptable or similar  
41  
42 370 performance compared to machine learning models, according to the outcomes. In clinical  
43  
44 371 prediction models, a previous systematic review reported no performance benefit of the  
45  
46 372 machine learning model over LR.<sup>40</sup> The previous study stated that machine learning models  
47  
48 373 tend to show high performance with a strong signal-to-noise ratio problem like gaming,  
49  
50 374 image recognition. However, clinical prediction problems often result in a poor signal-to-

1  
2  
3  
4 375 noise ratio.<sup>40</sup> If we could use unstructured data, which has strong signal-to-noise ratio like  
5  
6 376 continuous vital sign monitoring data or audiovisual data for patients' appearance, machine  
7  
8  
9 377 learning models might perform better than LR models. In addition, if we analyzed more  
10  
11 378 patient data, the performance improvement of machine models might be elucidated.

12  
13 379       Precise assessment in prehospital field could contribute to improved patient-related  
14  
15 380 outcomes. High demand of EMS call and response, disparity in accessibility to definitive care  
16  
17 381 capable hospitals according to regions,<sup>34</sup> and the importance of timely management in acute  
18  
19 382 disease care are the chief reasons behind the necessity for the accurate assessment of EMS  
20  
21 383 providers. Although information acquisition and processing is quite difficult in prehospital  
22  
23 384 areas, various instruments and information systems could attribute to diminish those  
24  
25 385 problems. Complex data acquisition like mobile CT or other unstructured data<sup>41</sup>, information  
26  
27 386 sharing through telemedicine,<sup>42</sup> and decision support tools in prehospital environments<sup>43</sup>  
28  
29 387 could contribute to the accurate assessment of EMS providers. More information acquisition  
30  
31 388 and real-time processing of those data could improve the clinical prediction models in  
32  
33 389 prehospital areas, which could lead to the improvement of patients' safety and outcomes.

34  
35 390       Our study had several limitations. First, our data were collected at three teaching  
36  
37 391 hospitals in urban areas of South Korea. Therefore, external validation for other areas should  
38  
39 392 be conducted to generalize the developed prediction model. Second, we used retrospective  
40  
41 393 analysis of electronically collected prehospital and hospital data. There might be various  
42  
43 394 information loss and missing data. We treated missing status as a separate category for our  
44  
45 395 analysis;<sup>44</sup> however, there could be different reasons for missing data. Third, there is a  
46  
47 396 possibility that the prediction model was overfitted or underfitted. The use of large number of  
48  
49 397 predictors also can contribute to overfitting. To minimize this issue, we rigorously searched  
50  
51 398 hyperparameters and carefully chose hyperparameters according to the performance in  
52  
53  
54  
55  
56  
57  
58  
59  
60

1  
2  
3  
4 399 independent validation cohorts. Fourth, we selected our study population using trauma center  
5  
6 400 transport criteria for EMS providers in Korea. Although those criteria are based on the field  
7  
8 401 triage decision scheme which is the most widely used prehospital trauma triage protocol,<sup>6</sup>  
9  
10 402 extrapolation to another EMS setting or general trauma patients would be limited. Fifth,  
11  
12 403 Abbreviated Injury Scale (AIS) codes were not used to identify our study outcome because of  
13  
14 404 a lack of information. To compensate for this limitation, we further identified TBI-I, TBI-  
15  
16 405 ND, and TBI-D patients to consider severity. However, different definitions of clinical  
17  
18 406 severity, including ICU admission or emergency operation, might be possible. Lastly, this  
19  
20 407 study was performed in an intermediate-service-level EMS system. The generalization of our  
21  
22 408 study findings to different EMS settings should be made with caution.

23  
24  
25  
26  
27 409 In conclusion, we presented data on TBI among patients with severe trauma assessed  
28  
29 410 by EMS providers, and our results inform the development of prediction models for the  
30  
31 411 diagnosis and prognosis of TBI in our population. We used various information that can be  
32  
33 412 obtained in prehospital settings and showed acceptable outcome performance. The consistent  
34  
35 413 importance of consciousness-status-related variables emphasizes the importance of  
36  
37 414 assessment and monitoring of consciousness status in prehospital areas. Although  
38  
39 415 prospective, and implementation studies are needed for TBI prediction in prehospital areas,  
40  
41 416 our study outlined a novel method for the precise assessment of EMS providers using a  
42  
43 417 machine-learning-based prediction model. Further collection of various types of patient-  
44  
45 418 related data would contribute to the enhanced performance of the clinical prediction model in  
46  
47 419 prehospital settings.

48  
49  
50  
51  
52 420

1  
2  
3  
4 421 **Author Contribution Statement**

5  
6  
7 422 YHC and JH Park designed and developed the study, analysed and interpreted the data, and  
8  
9 423 drafted the initial manuscript. KJH, YSR, KJS and SDS were involved in the acquisition of  
10  
11 424 data, the development of the research question and assisted with analysis and interpretation of  
12  
13  
14 425 data. All authors revised the drafts for intellectual content and edited the manuscript. All  
15  
16 426 authors reviewed and approved the final draft.

17  
18  
19 427

20  
21  
22  
23 428 **Funding**

24  
25  
26 429 This study was supported by grant No. '04-2019-0680' from the Seoul National University  
27  
28 430 Hospital Research Fund.

29  
30 431

31  
32  
33  
34 432 **Competing Interests**

35  
36 433 There are no conflicts of interest for all authors in this study.

37  
38 434

39  
40 435 **Patients consent**

41  
42 436 Not required

43  
44 437

45  
46  
47  
48  
49 438 **Data availability statement**

50  
51 439 No data are available. We do not have ethics approval to share data.

52  
53 440



1  
2  
3  
4 441 **Ethical statements**

5  
6 442 This study complied with the Declaration of Helsinki, and its protocol was approved by the  
7  
8 443 Institutional Review Board of the Seoul National University Hospital with a waiver of  
9  
10 444 informed consent (IRB No: E-2006-004-1128).  
11  
12

13 445

14  
15  
16  
17 446 **References**

- 18  
19 447 1. Hsia RY, Markowitz AJ, Lin F, et al. Ten-year trends in traumatic brain injury: a  
20  
21 448 retrospective cohort study of California emergency department and hospital revisits and  
22  
23 449 readmissions. *BMJ Open* 2018;8(12):e022297. doi: 10.1136/bmjopen-2018-022297  
24  
25 450 [published Online First: 2018/12/16]  
26  
27  
28 451 2. Finfer SR, Cohen J. Severe traumatic brain injury. *Resuscitation* 2001;48(1):77-90. doi:  
29  
30 452 10.1016/s0300-9572(00)00321-x [published Online First: 2001/02/13]  
31  
32  
33 453 3. Spaite DW, Bobrow BJ, Keim SM, et al. Association of Statewide Implementation of the  
34  
35 454 Prehospital Traumatic Brain Injury Treatment Guidelines With Patient Survival  
36  
37 455 Following Traumatic Brain Injury: The Excellence in Prehospital Injury Care (EPIC)  
38  
39 456 Study. *JAMA Surg* 2019;154(7):e191152. doi: 10.1001/jamasurg.2019.1152 [published  
40  
41 457 Online First: 2019/05/09]  
42  
43  
44 458 4. McHugh GS, Engel DC, Butcher I, et al. Prognostic value of secondary insults in traumatic  
45  
46 459 brain injury: results from the IMPACT study. *J Neurotrauma* 2007;24(2):287-93. doi:  
47  
48 460 10.1089/neu.2006.0031 [published Online First: 2007/03/23]  
49  
50  
51 461 5. Pelieu I, Kull C, Walder B. Prehospital and Emergency Care in Adult Patients with Acute  
52  
53 462 Traumatic Brain Injury. *Med Sci (Basel)* 2019;7(1) doi: 10.3390/medsci7010012  
54  
55 463 [published Online First: 2019/01/24]  
56  
57  
58 464 6. Sasser SM, Hunt RC, Faul M, et al. Guidelines for field triage of injured patients:  
59  
60

- 1  
2  
3  
4 465 recommendations of the National Expert Panel on Field Triage, 2011. *Morbidity and*  
5  
6 466 *Mortality Weekly Report: Recommendations and Reports* 2012;61(1):1-20.  
7  
8  
9 467 7. Ter Avest E, Taylor S, Wilson M, et al. Prehospital clinical signs are a poor predictor of  
10  
11 468 raised intracranial pressure following traumatic brain injury. *Emerg Med J*  
12  
13 469 2021;38(1):21-26. doi: 10.1136/emered-2020-209635 [published Online First:  
14  
15 470 2020/09/20]  
16  
17  
18 471 8. Collaborators MCT, Perel P, Arango M, et al. Predicting outcome after traumatic brain injury:  
19  
20 472 practical prognostic models based on large cohort of international patients. *BMJ*  
21  
22 473 2008;336(7641):425-9. doi: 10.1136/bmj.39461.643438.25 [published Online First:  
23  
24 474 2008/02/14]  
25  
26  
27 475 9. Steyerberg EW, Mushkudiani N, Perel P, et al. Predicting outcome after traumatic brain  
28  
29 476 injury: development and international validation of prognostic scores based on  
30  
31 477 admission characteristics. *PLoS Med* 2008;5(8):e165; discussion e65. doi:  
32  
33 478 10.1371/journal.pmed.0050165 [published Online First: 2008/08/08]  
34  
35  
36 479 10. Gozt AK, Hellewell SC, Thorne J, et al. Predicting outcome following mild traumatic brain  
37  
38 480 injury: protocol for the longitudinal, prospective, observational Concussion Recovery  
39  
40 481 (CREST) cohort study. *BMJ Open* 2021;11(5):e046460. doi: 10.1136/bmjopen-2020-  
41  
42 482 046460 [published Online First: 2021/05/15]  
43  
44  
45 483 11. Huth SF, Slater A, Waak M, et al. Predicting Neurological Recovery after Traumatic Brain  
46  
47 484 Injury in Children: A Systematic Review of Prognostic Models. *J Neurotrauma*  
48  
49 485 2020;37(20):2141-49. doi: 10.1089/neu.2020.7158 [published Online First: 2020/05/29]  
50  
51  
52 486 12. Perel P, Edwards P, Wentz R, et al. Systematic review of prognostic models in traumatic  
53  
54 487 brain injury. *BMC Med Inform Decis Mak* 2006;6:38. doi: 10.1186/1472-6947-6-38  
55  
56 488 [published Online First: 2006/11/16]  
57  
58  
59  
60

- 1  
2  
3  
4 489 13. Miller PR, Chang MC, Hoth JJ, et al. Predicting Mortality and Independence at Discharge  
5  
6 490 in the Aging Traumatic Brain Injury Population Using Data Available at Admission. *J*  
7  
8 491 *Am Coll Surg* 2017;224(4):680-85. doi: 10.1016/j.jamcollsurg.2016.12.053 [published  
9  
10 492 Online First: 2017/03/07]  
11  
12  
13 493 14. Abujaber A, Fadlalla A, Gammoh D, et al. Prediction of in-hospital mortality in patients  
14  
15 494 with post traumatic brain injury using National Trauma Registry and Machine Learning  
16  
17 495 Approach. *Scand J Trauma Resusc Emerg Med* 2020;28(1):44. doi: 10.1186/s13049-  
18  
19 496 020-00738-5 [published Online First: 2020/05/29]  
20  
21  
22 497 15. Gravesteijn BY, Nieboer D, Ercole A, et al. Machine learning algorithms performed no  
23  
24 498 better than regression models for prognostication in traumatic brain injury. *J Clin*  
25  
26 499 *Epidemiol* 2020;122:95-107. doi: 10.1016/j.jclinepi.2020.03.005 [published Online  
27  
28 500 First: 2020/03/24]  
29  
30  
31 501 16. Roozenbeek B, Lingsma HF, Lecky FE, et al. Prediction of outcome after moderate and  
32  
33 502 severe traumatic brain injury: external validation of the International Mission on  
34  
35 503 Prognosis and Analysis of Clinical Trials (IMPACT) and Corticoid Randomisation  
36  
37 504 After Significant Head injury (CRASH) prognostic models. *Crit Care Med*  
38  
39 505 2012;40(5):1609-17. doi: 10.1097/CCM.0b013e31824519ce [published Online First:  
40  
41 506 2012/04/19]  
42  
43  
44 507 17. Wasserman EB, Shah MN, Jones CM, et al. Identification of a neurologic scale that  
45  
46 508 optimizes EMS detection of older adult traumatic brain injury patients who require  
47  
48 509 transport to a trauma center. *Prehosp Emerg Care* 2015;19(2):202-12. doi:  
49  
50 510 10.3109/10903127.2014.959225 [published Online First: 2014/10/08]  
51  
52  
53 511 18. Collins GS, Reitsma JB, Altman DG, et al. Transparent Reporting of a multivariable  
54  
55 512 prediction model for Individual Prognosis Or Diagnosis (TRIPOD). *Ann Intern Med*  
56  
57  
58  
59  
60

- 1  
2  
3  
4 513 2015;162(10):735-6. doi: 10.7326/L15-5093-2 [published Online First: 2015/05/20]  
5  
6 514 19. Sasser SM, Hunt RC, Sullivent EE, et al. Guidelines for field triage of injured patients:  
7  
8 515 recommendations of the National Expert Panel on Field Triage. 2009  
9  
10 516 20. Sasser SM, Hunt RC, Faul M, et al. Guidelines for field triage of injured patients:  
11  
12 517 recommendations of the National Expert Panel on Field Triage, 2011. *MMWR Recomm*  
13  
14 518 *Rep* 2012;61(RR-1):1-20. [published Online First: 2012/01/13]  
15  
16 519 21. Andelic N, Anke A, Skandsen T, et al. Incidence of hospital-admitted severe traumatic  
17  
18 520 brain injury and in-hospital fatality in Norway: a national cohort study.  
19  
20 521 *Neuroepidemiology* 2012;38(4):259-67. doi: 10.1159/000338032 [published Online  
21  
22 522 First: 2012/06/09]  
23  
24 523 22. Ro YS, Shin SD, Holmes JF, et al. Comparison of clinical performance of cranial computed  
25  
26 524 tomography rules in patients with minor head injury: a multicenter prospective study.  
27  
28 525 *Acad Emerg Med* 2011;18(6):597-604. doi: 10.1111/j.1553-2712.2011.01094.x  
29  
30 526 [published Online First: 2011/06/17]  
31  
32 527 23. Chan V, Thurairajah P, Colantonio A. Defining pediatric traumatic brain injury using  
33  
34 528 International Classification of Diseases Version 10 Codes: a systematic review. *BMC*  
35  
36 529 *Neurol* 2015;15:7. doi: 10.1186/s12883-015-0259-7 [published Online First:  
37  
38 530 2015/02/05]  
39  
40 531 24. Zou H, Hastie T. Regularization and variable selection via the elastic net. *Journal of the*  
41  
42 532 *Royal Statistical Society: Series B (Statistical Methodology)* 2005;67(2):301-20. doi:  
43  
44 533 10.1111/j.1467-9868.2005.00503.x  
45  
46 534 25. Hearst MA, Dumais ST, Osuna E, et al. Support vector machines. *IEEE Intelligent Systems*  
47  
48 535 *and their Applications* 1998;13(4):18-28. doi: 10.1109/5254.708428  
49  
50 536 26. Chen T, Guestrin C. XGBoost: A Scalable Tree Boosting System. Proceedings of the 22nd  
51  
52  
53  
54  
55  
56  
57  
58  
59  
60

- 1  
2  
3  
4 537 ACM SIGKDD International Conference on Knowledge Discovery and Data Mining.  
5  
6 538 San Francisco, California, USA: Association for Computing Machinery, 2016:785–94.  
7  
8  
9 539 27. Menard S. Applied logistic regression analysis: Sage 2002. pp. 162.  
10  
11 540 28. Oostema JA, Konen J, Chassee T, et al. Clinical predictors of accurate prehospital stroke  
12  
13 541 recognition. *Stroke* 2015;46(6):1513-7. doi: 10.1161/STROKEAHA.115.008650  
14  
15 542 [published Online First: 2015/04/30]  
16  
17  
18 543 29. Swan PY, Nighswonger B, Boswell GL, et al. Factors associated with false-positive  
19  
20 544 emergency medical services triage for percutaneous coronary intervention. *West J*  
21  
22 545 *Emerg Med* 2009;10(4):208-12. [published Online First: 2010/01/05]  
23  
24  
25 546 30. Park JH, Shin SD, Song KJ, et al. Prediction of good neurological recovery after out-of-  
26  
27 547 hospital cardiac arrest: A machine learning analysis. *Resuscitation* 2019;142:127-35.  
28  
29 548 doi: 10.1016/j.resuscitation.2019.07.020 [published Online First: 2019/07/31]  
30  
31  
32 549 31. Esposito TJ, Offner PJ, Jurkovich GJ, et al. Do prehospital trauma center triage criteria  
33  
34 550 identify major trauma victims? *Arch Surg* 1995;130(2):171-6. doi:  
35  
36 551 10.1001/archsurg.1995.01430020061010 [published Online First: 1995/02/01]  
37  
38  
39 552 32. Ocak G, Sturms LM, Hoogeveen JM, et al. Prehospital identification of major trauma  
40  
41 553 patients. *Langenbecks Arch Surg* 2009;394(2):285-92. doi: 10.1007/s00423-008-0340-  
42  
43 554 4 [published Online First: 2008/06/27]  
44  
45  
46 555 33. Fries GR, McCalla G, Levitt MA, et al. A prospective comparison of paramedic judgment  
47  
48 556 and the trauma triage rule in the prehospital setting. *Ann Emerg Med* 1994;24(5):885-  
49  
50 557 9. doi: 10.1016/s0196-0644(94)70207-1 [published Online First: 1994/11/01]  
51  
52  
53 558 34. Branas CC, MacKenzie EJ, Williams JC, et al. Access to trauma centers in the United States.  
54  
55 559 *JAMA* 2005;293(21):2626-33. doi: 10.1001/jama.293.21.2626 [published Online First:  
56  
57 560 2005/06/02]  
58  
59  
60

- 1  
2  
3  
4 561 35. Whiting MD, Dengler BA, Rodriguez CL, et al. Prehospital Detection of Life-Threatening  
5  
6 562 Intracranial Pathology: An Unmet Need for Severe TBI in Austere, Rural, and Remote  
7  
8 563 Areas. *Front Neurol* 2020;11:599268. doi: 10.3389/fneur.2020.599268 [published  
9  
10 564 Online First: 2020/11/17]
- 11  
12  
13 565 36. Wojcik SM. Predicting mild traumatic brain injury patients at risk of persistent symptoms  
14  
15 566 in the Emergency Department. *Brain Inj* 2014;28(4):422-30. doi:  
16  
17 567 10.3109/02699052.2014.884241 [published Online First: 2014/02/26]
- 18  
19  
20 568 37. Management of Concussion/m TBIWG. VA/DoD Clinical Practice Guideline for  
21  
22 569 Management of Concussion/Mild Traumatic Brain Injury. *J Rehabil Res Dev*  
23  
24 570 2009;46(6):CP1-68. [published Online First: 2010/01/30]
- 25  
26  
27 571 38. Grote S, Bocker W, Mutschler W, et al. Diagnostic value of the Glasgow Coma Scale for  
28  
29 572 traumatic brain injury in 18,002 patients with severe multiple injuries. *J Neurotrauma*  
30  
31 573 2011;28(4):527-34. doi: 10.1089/neu.2010.1433 [published Online First: 2011/01/27]
- 32  
33  
34 574 39. Badjatia N, Carney N, Crocco TJ, et al. Guidelines for prehospital management of traumatic  
35  
36 575 brain injury 2nd edition. *Prehosp Emerg Care* 2008;12 Suppl 1:S1-52. doi:  
37  
38 576 10.1080/10903120701732052 [published Online First: 2008/09/06]
- 39  
40  
41 577 40. Christodoulou E, Ma J, Collins GS, et al. A systematic review shows no performance  
42  
43 578 benefit of machine learning over logistic regression for clinical prediction models. *J*  
44  
45 579 *Clin Epidemiol* 2019;110:12-22. doi: 10.1016/j.jclinepi.2019.02.004 [published Online  
46  
47 580 First: 2019/02/15]
- 48  
49  
50 581 41. Nakada TA, Masunaga N, Nakao S, et al. Development of a prehospital vital signs chart  
51  
52 582 sharing system. *Am J Emerg Med* 2016;34(1):88-92. doi: 10.1016/j.ajem.2015.09.048  
53  
54 583 [published Online First: 2015/10/29]
- 55  
56  
57 584 42. Kim Y, Groombridge C, Romero L, et al. Decision Support Capabilities of Telemedicine  
58  
59  
60

- 1  
2  
3  
4 585 in Emergency Prehospital Care: Systematic Review. *J Med Internet Res*  
5  
6 586 2020;22(12):e18959. doi: 10.2196/18959 [published Online First: 2020/12/09]  
7  
8  
9 587 43. Reisner AT, Khitrov MY, Chen L, et al. Development and validation of a portable platform  
10  
11 588 for deploying decision-support algorithms in prehospital settings. *Appl Clin Inform*  
12  
13 589 2013;4(3):392-402. doi: 10.4338/ACI-2013-04-RA-0023 [published Online First:  
14  
15 590 2013/10/25]  
16  
17  
18 591 44. Maslove DM, Podchiyska T, Lowe HJ. Discretization of continuous features in clinical  
19  
20 592 datasets. *J Am Med Inform Assoc* 2013;20(3):544-53. doi: 10.1136/amiajnl-2012-  
21  
22 593 000929 [published Online First: 2012/10/13]  
23  
24  
25  
26 594  
27  
28  
29  
30  
31  
32  
33  
34  
35  
36  
37  
38  
39  
40  
41  
42  
43  
44  
45  
46  
47  
48  
49  
50  
51  
52  
53  
54  
55  
56  
57  
58  
59  
60

1  
2  
3  
4 595 **Figure legends**  
5

6  
7 596 Figure 1. Population flow. EMS, emergency medical service; OHCA, out-of-hospital cardiac  
8  
9 597 arrest; TBI, traumatic brain injury.  
10

11 598  
12  
13  
14  
15  
16  
17  
18  
19  
20  
21  
22  
23  
24  
25  
26  
27  
28  
29  
30  
31  
32  
33  
34  
35  
36  
37  
38  
39  
40  
41  
42  
43  
44  
45  
46  
47  
48  
49  
50  
51  
52  
53  
54  
55  
56  
57  
58  
59  
60

For peer review only



599 Table 1. Key characteristics of the development and test cohorts.

|                              | n (%) or Median (IQR) |                    |               | P      |
|------------------------------|-----------------------|--------------------|---------------|--------|
|                              | Total                 | Development cohort | Test cohort   |        |
| Total                        | N = 1169              | n = 867            | n = 302       |        |
| Demographics                 |                       |                    |               |        |
| Age, years                   | 53 (36–66)            | 52 (35–66)         | 56 (40–69)    | < 0.01 |
| Male                         | 809 (69.2)            | 592 (68.3)         | 217 (71.9)    | 0.25   |
| Job, unemployed              | 299 (25.6)            | 197 (22.7)         | 102 (33.8)    | < 0.01 |
| Diabetes                     | 62 (5.3)              | 35 (4.0)           | 27 (8.9)      | < 0.01 |
| Hypertension                 | 105 (9.0)             | 61 (7.0)           | 44 (14.6)     | < 0.01 |
| Circumstances of trauma      |                       |                    |               |        |
| Location, road/highway       | 444 (38.0)            | 326 (37.6)         | 118 (39.1)    | 0.65   |
| Season, summer               | 336 (28.7)            | 253 (29.2)         | 83 (27.5)     | 0.57   |
| Weekday, weekend             | 811 (69.4)            | 599 (69.1)         | 212 (70.2)    | 0.72   |
| Time, 6 p.m. to midnight     | 361 (30.9)            | 265 (30.6)         | 96 (31.8)     | 0.69   |
| Mechanism of injury, TA      | 500 (42.8)            | 375 (43.3)         | 125 (41.4)    | 0.57   |
| Chief complaint              |                       |                    |               |        |
| Fracture/abrasion/laceration | 302 (25.8)            | 204 (23.5)         | 98 (32.5)     | < 0.01 |
| EMS vital sign assessment    |                       |                    |               |        |
| SBP, mmHg                    | 130 (109–150)         | 130 (104–146)      | 131 (115–150) | < 0.01 |
| DBP, mmHg                    | 80 (70–91)            | 80 (69–90)         | 80 (70–92)    | 0.21   |
| RR, /min                     | 18 (16–20)            | 18 (16–20)         | 18 (16–20)    | 0.33   |
| HR, /min                     | 86 (75–99)            | 86 (74–99)         | 86 (76–100)   | 0.40   |
| SpO <sub>2</sub> , %         | 98 (95–99)            | 98 (95–99)         | 98 (96–99)    | 0.67   |
| AVPU scale, Alert            | 714 (61.1)            | 504 (58.1)         | 210 (69.5)    | < 0.01 |
| EMS management               |                       |                    |               |        |
| Intravenous route            | 176 (15.1)            | 129 (14.9)         | 47 (15.6)     | 0.77   |
| Hemorrhage control           | 586 (50.1)            | 426 (49.1)         | 160 (53.0)    | 0.25   |
| Spinal motion restriction    | 811 (69.4)            | 606 (69.9)         | 205 (67.9)    | 0.51   |
| Oxygen supply                | 233 (19.9)            | 176 (20.3)         | 57 (18.9)     | 0.59   |
| In-hospital mortality        | 90 (7.7)              | 74 (8.5)           | 16 (5.3)      | 0.07   |
| Outcomes                     |                       |                    |               |        |
| TBI                          | 281 (24.0)            | 215 (24.8)         | 66 (21.9)     | 0.30   |
| TBI with intracranial injury | 251 (21.5)            | 195 (22.5)         | 56 (18.5)     | 0.15   |
| TBI-related non-discharge    | 249 (21.3)            | 192 (22.1)         | 57 (18.9)     | 0.23   |
| TBI-related death            | 43 (3.7)              | 32 (3.7)           | 11 (3.6)      | 0.95   |

600 IQR, interquartile range; TA, traffic accident; SBP, systolic blood pressure; DBP, diastolic  
601 blood pressure; RR, respiratory rate; AVPU, mental status in alert, verbal, pain, and  
602 unresponsive scale; ED, emergency department; TBI, traumatic brain injury.

603 Table 2. Discrimination and reclassification of prediction models for outcomes on test  
604 cohort.

| Outcome | Model | AUROC (95% CI)       | p <sup>a</sup> | NRI (95% CI)           | p <sup>b</sup> | AUPRC |
|---------|-------|----------------------|----------------|------------------------|----------------|-------|
| TBI     |       |                      |                |                        |                |       |
|         | LR    | 0.770 (0.698, 0.841) | NA             | NA                     | NA             | 0.492 |
|         | XGB   | 0.809 (0.743, 0.876) | 0.04           | 0.689 (0.427, 0.951)   | < 0.01         | 0.552 |
|         | SVM   | 0.776 (0.708, 0.844) | 0.77           | 0.339 (0.072, 0.607)   | 0.01           | 0.479 |
|         | RF    | 0.800 (0.735, 0.865) | 0.13           | 0.308 (0.047, 0.569)   | 0.02           | 0.532 |
|         | EN    | 0.799 (0.732, 0.867) | 0.06           | 0.698 (0.441, 0.954)   | < 0.01         | 0.564 |
| TBI-I   |       |                      |                |                        |                |       |
|         | LR    | 0.820 (0.751, 0.890) | NA             | NA                     | NA             | 0.551 |
|         | XGB   | 0.838 (0.775, 0.901) | 0.28           | 0.539 (0.258, 0.821)   | < 0.01         | 0.554 |
|         | SVM   | 0.812 (0.748, 0.875) | 0.66           | 0.729 (0.464, 0.994)   | < 0.01         | 0.469 |
|         | RF    | 0.836 (0.772, 0.899) | 0.38           | 0.333 (0.058, 0.607)   | 0.02           | 0.552 |
|         | EN    | 0.844 (0.779, 0.910) | 0.15           | 1.093 (0.845, 1.342)   | < 0.01         | 0.606 |
| TBI-ND  |       |                      |                |                        |                |       |
|         | LR    | 0.767 (0.690, 0.844) | NA             | NA                     | NA             | 0.482 |
|         | XGB   | 0.800 (0.727, 0.873) | 0.07           | 0.605 (0.326, 0.884)   | < 0.01         | 0.496 |
|         | SVM   | 0.778 (0.704, 0.852) | 0.56           | 0.285 (-0.001, 0.572)  | 0.05           | 0.477 |
|         | RF    | 0.809 (0.739, 0.880) | 0.03           | 0.194 (-0.059, 0.448)  | 0.13           | 0.535 |
|         | EN    | 0.811 (0.741, 0.882) | 0.02           | 0.768 (0.496, 1.039)   | < 0.01         | 0.551 |
| TBI-D   |       |                      |                |                        |                |       |
|         | LR    | 0.664 (0.490, 0.838) | NA             | NA                     | NA             | 0.138 |
|         | XGB   | 0.714 (0.512, 0.917) | 0.64           | -0.026 (-0.605, 0.553) | 0.93           | 0.094 |
|         | SVM   | 0.814 (0.718, 0.910) | 0.09           | 0.209 (-0.325, 0.742)  | 0.44           | 0.140 |
|         | RF    | 0.889 (0.801, 0.976) | < 0.01         | -0.204 (-0.742, 0.334) | 0.46           | 0.196 |
|         | EN    | 0.871 (0.764, 0.978) | 0.01           | 0.119 (-0.415, 0.654)  | 0.66           | 0.293 |

605 <sup>a</sup>Comparing the AUROC and the logistic regression model.

606 <sup>b</sup>Comparing the NRI and the logistic regression model.

607 AUROC, area under the receiver operating characteristic curve; CI, confidence interval;

608 NRI, net reclassification index; AUPRC, area under precision-recall curve; TBI,

609 traumatic brain injury, TBI-I, traumatic brain injury with intracranial injury; TBI-ND;

610 traumatic brain injury with non-discharge; TBI-D, traumatic brain injury with death;

611 LR, logistic regression analysis; XGB, extreme gradient boosting; SVM, support vector

612 machine; RF, random forest; EN, elastic net

613

614

615

616 Table 3. Test characteristics of prediction models for outcomes on test cohort.

| Outcome | Model | Specificity (95% CI) | Sensitivity (95% CI) | PPV (95% CI)      | NPV (95% CI)      | Cutoff |
|---------|-------|----------------------|----------------------|-------------------|-------------------|--------|
| TBI     |       |                      |                      |                   |                   |        |
|         | LR    | 47.5 (40.9, 54.0)    | 80.3 (68.7, 89.1)    | 29.9 (23.3, 37.3) | 89.6 (82.9, 94.3) | 0.136  |
|         | XGB   | 72.5 (66.3, 78.1)    | 80.3 (68.7, 89.1)    | 44.9 (35.7, 54.3) | 92.9 (88.2, 96.2) | 0.268  |
|         | SVM   | 64.8 (58.4, 70.9)    | 80.3 (68.7, 89.1)    | 39.0 (30.7, 47.7) | 92.2 (87.0, 95.8) | 0.191  |
|         | RF    | 68.2 (61.9, 74.1)    | 80.3 (68.7, 89.1)    | 41.4 (32.8, 50.4) | 92.5 (87.6, 96.0) | 0.185  |
|         | EN    | 61.0 (54.5, 67.3)    | 80.3 (68.7, 89.1)    | 36.6 (28.7, 44.9) | 91.7 (86.3, 95.5) | 0.205  |
| TBI-I   |       |                      |                      |                   |                   |        |
|         | LR    | 71.1 (65.0, 76.7)    | 80.4 (67.6, 89.8)    | 38.8 (29.9, 48.3) | 94.1 (89.7, 97.0) | 0.164  |
|         | XGB   | 74.0 (68.0, 79.4)    | 80.4 (67.6, 89.8)    | 41.3 (31.9, 51.1) | 94.3 (90.0, 97.1) | 0.143  |
|         | SVM   | 71.1 (65.0, 76.7)    | 80.4 (67.6, 89.8)    | 38.8 (29.9, 48.3) | 94.1 (89.7, 97.0) | 0.172  |
|         | RF    | 76.0 (70.2, 81.2)    | 80.4 (67.6, 89.8)    | 43.3 (33.6, 53.3) | 94.4 (90.3, 97.2) | 0.205  |
|         | EN    | 81.3 (75.9, 86.0)    | 80.4 (67.6, 89.8)    | 49.5 (38.8, 60.1) | 94.8 (90.9, 97.4) | 0.204  |
| TBI-ND  |       |                      |                      |                   |                   |        |
|         | LR    | 46.1 (39.8, 52.6)    | 80.7 (68.1, 90.0)    | 25.8 (19.6, 32.9) | 91.1 (84.7, 95.5) | 0.090  |
|         | XGB   | 66.5 (60.2, 72.4)    | 80.7 (68.1, 90.0)    | 35.9 (27.7, 44.9) | 93.7 (89.0, 96.8) | 0.242  |
|         | SVM   | 59.2 (52.7, 65.4)    | 80.7 (68.1, 90.0)    | 31.5 (24.1, 39.7) | 92.9 (87.7, 96.4) | 0.147  |
|         | RF    | 60.4 (54.0, 66.6)    | 80.7 (68.1, 90.0)    | 32.2 (24.6, 40.5) | 93.1 (88.0, 96.5) | 0.138  |
|         | EN    | 74.3 (68.3, 79.6)    | 80.7 (68.1, 90.0)    | 42.2 (32.8, 52.0) | 94.3 (90.0, 97.1) | 0.201  |
| TBI-D   |       |                      |                      |                   |                   |        |
|         | LR    | 42.6 (36.9, 48.5)    | 81.8 (48.2, 97.7)    | 5.1 (2.4, 9.5)    | 98.4 (94.4, 99.8) | 0.005  |
|         | XGB   | 57.7 (51.8, 63.5)    | 81.8 (48.2, 97.7)    | 6.8 (3.2, 12.5)   | 98.8 (95.8, 99.9) | 0.002  |
|         | SVM   | 74.2 (68.8, 79.2)    | 81.8 (48.2, 97.7)    | 10.7 (5.0, 19.4)  | 99.1 (96.7, 99.9) | 0.039  |
|         | RF    | 74.9 (69.5, 79.8)    | 81.8 (48.2, 97.7)    | 11.0 (5.1, 19.8)  | 99.1 (96.8, 99.9) | 0.005  |
|         | EN    | 79.0 (73.9, 83.6)    | 81.8 (48.2, 97.7)    | 12.9 (6.1, 23.0)  | 99.1 (96.9, 99.9) | 0.033  |

617 TBI, traumatic brain injury; TBI-I, traumatic brain injury with intracranial injury; TBI-  
618 ND; traumatic brain injury with non-discharge; TBI-D, traumatic brain injury with  
619 death; LR, logistic regression analysis; XGB, extreme gradient boosting; SVM, support  
620 vector machine; RF, random forest; EN, elastic net.

621

622 Table 4. Top 5 important variables for outcomes in descending order using model  
 623 specific metrics

| Outcome | Rank | LR                    | XGB                   | RF                    | EN                    |
|---------|------|-----------------------|-----------------------|-----------------------|-----------------------|
| TBI     |      |                       |                       |                       |                       |
|         | 1    | Loss of consciousness | Loss of consciousness | Loss of consciousness | Loss of consciousness |
|         | 2    | GCS, Eye, 1           | GCS, Eye, 1           | GCS, Eye, 1           | GCS, Motor, 1         |
|         | 3    | GCS, Verbal, 1        | GCS, Verbal, 1        | GCS, Verbal, 1        | GCS, Motor, 2         |
|         | 4    | Light reflex          | Other mechanism       | Light reflex          | GCS, Eye, 1           |
|         | 5    | GCS, Motor, 1         | GCS, Verbal, 2        | GCS, Motor, 1         | GCS, Verbal, 1        |
| TBI-I   |      |                       |                       |                       |                       |
|         | 1    | Loss of consciousness | Loss of consciousness | Loss of consciousness | GCS, Eye, 1           |
|         | 2    | GCS, Eye, 1           | GCS, Eye, 1           | GCS, Eye, 1           | Loss of consciousness |
|         | 3    | GCS, Verbal, 1        | GCS, Verbal, 1        | GCS, Verbal, 1        | GCS, Motor, 1         |
|         | 4    | Light reflex          | GCS, Verbal, 2        | Light reflex          | GCS, Verbal, 1        |
|         | 5    | GCS, Motor, 1         | Other mechanism       | GCS, Motor, 1         | Light reflex          |
| TBI-ND  |      |                       |                       |                       |                       |
|         | 1    | Loss of consciousness | Loss of consciousness | Loss of consciousness | Loss of consciousness |
|         | 2    | GCS, Eye, 1           | GCS, Eye, 1           | GCS, Eye, 1           | GCS, Eye, 1           |
|         | 3    | GCS, Verbal, 1        | GCS, Verbal, 1        | GCS, Verbal, 1        | GCS, Motor, 1         |
|         | 4    | Light reflex          | GCS, Verbal, 2        | GCS, Verbal, 2        | GCS, Verbal, 1        |
|         | 5    | GCS, Motor, 1         | GCS, Motor, 1         | GCS, Motor, 4         | Light reflex          |
| TBI-D   |      |                       |                       |                       |                       |
|         | 1    | Loss of consciousness | GCS, Verbal, 1        | GCS, Verbal, 1        | GCS, Motor, 2         |
|         | 2    | GCS, Verbal, 1        | Oxygen saturation<96% | Light reflex          | GCS, Verbal, 1        |
|         | 3    | GCS, Eye, 1           | Fall mechanism        | Loss of consciousness | Loss of consciousness |
|         | 4    | Light reflex          | Afternoon             | GCS, Eye, 1           | Age over 80           |
|         | 5    | GCS, Motor, 1         | Light reflex          | GCS, Motor, 1         | HR 87-99              |

624 TBI, traumatic brain injury; TBI-I, traumatic brain injury with intracranial injury; TBI-  
 625 ND; traumatic brain injury with non-discharge; TBI-D, traumatic brain injury with  
 626 death; LR, logistic regression; XGB, extreme gradient boosting; RF, random forest; EN,  
 627 elastic net; GCS, Glasgow coma scale; HR, heart rate.

628

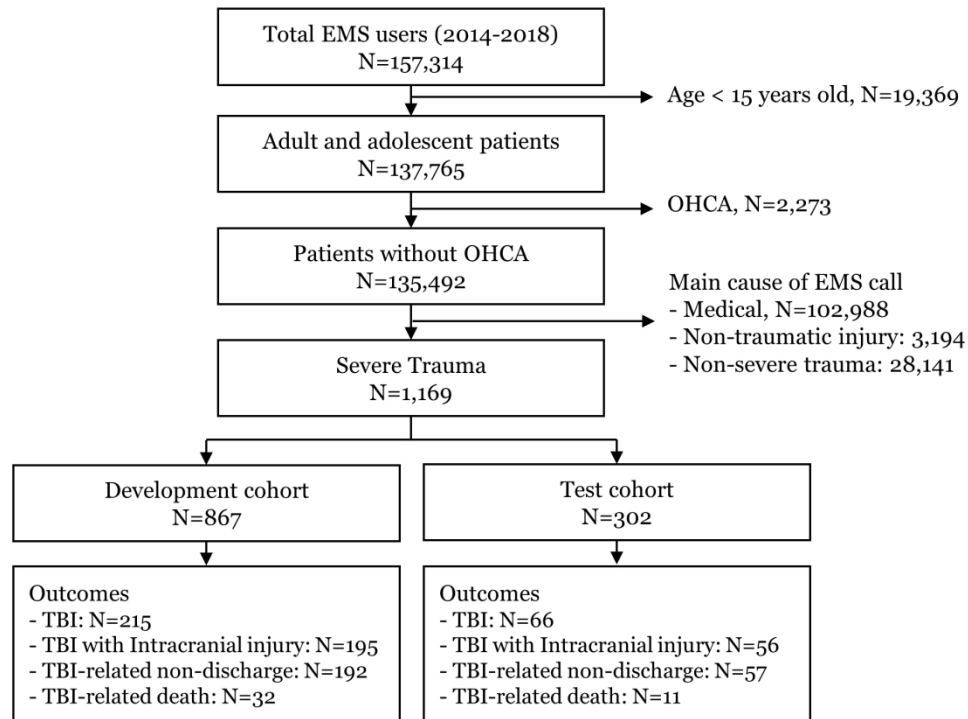

Figure 1. Population flow. EMS, emergency medical service; OHCA, out-of-hospital cardiac arrest; TBI, traumatic brain injury.

165x119mm (300 x 300 DPI)

Supplementary Table 1. List of analyzed variables.

| Variables                 | Descriptions                                  | Type of raw data | Category                                                                                                               | Preprocessing                                                     |
|---------------------------|-----------------------------------------------|------------------|------------------------------------------------------------------------------------------------------------------------|-------------------------------------------------------------------|
| Gender                    | Sex of the patients                           | Binary           | Male, Female                                                                                                           |                                                                   |
| Age                       | Age of patients                               | Continuous       | 15-39 years, 40-59 years, 60-79 years, and 80- years                                                                   | Discretization and one hot encoding                               |
| Job                       | Job of patients                               | Categorical      | Unemployed, Student/Housewife; Office/Commercial/Service workers; Industrial/Agricultural/Fishery/Miner worker; Others | One hot encoding<br>Missing data were classified into others      |
| Diabetes                  | History of diabetes mellitus                  | Binary           | Yes, No                                                                                                                | Missing data were classified into no                              |
| Hypertension              | History of hypertension                       | Binary           | Yes, No                                                                                                                | Missing data were classified into no                              |
| Location of injury        | Location of injury                            | Categorical      | home/residential area/medical facility/school/gym; Road/highway; Off-road traffic area; Others                         | One hot encoding<br>Missing data were classified into others      |
| Season                    | Season when injury occurred                   | Categorical      | Spring, Summer, Fall, Winter                                                                                           | One hot encoding                                                  |
| Weekend                   | Whether Injury occurred on weekday or weekend | Binary           | Weekday, Weekend                                                                                                       |                                                                   |
| Daytime                   | When injury was occurred                      | Categorical      | Night (Midnight to 5AM), Morning (6AM to 11AM), Afternoon (Midday to 5PM), Evening (6PM to 11PM)                       | One hot encoding<br>Missing time were imputed using EMS call time |
| Mechanism of injury       | Mechanism of injury                           | Categorical      | Slip down, Fall down, Traffic accident, Other                                                                          | One hot encoding<br>Missing data were classified into others      |
| Glasgow coma scale eye    | Eye element of Glasgow coma scale             | Categorical      | 1;2;3;4;Unknown                                                                                                        | One hot encoding                                                  |
| Glasgow coma scale Verbal | Verbal element of Glasgow coma scale          | Categorical      | 1;2;3;4;5;Unknown                                                                                                      | One hot encoding                                                  |
| Glasgow coma scale Motor  | Motor element of Glasgow coma scale           | Categorical      | 1;2;3;4;5;6;Unknown                                                                                                    | One hot encoding                                                  |
| Light Reflex any Abnormal | Any abnormality of light reflex on any side   | Categorical      | No, Yes, Unknown                                                                                                       | One hot encoding<br>Missing data were classified into unknown     |

|                              |       |                                         |            |                                                           |                                                                                                                                                                                         |
|------------------------------|-------|-----------------------------------------|------------|-----------------------------------------------------------|-----------------------------------------------------------------------------------------------------------------------------------------------------------------------------------------|
| Systolic blood pressure      | blood | Systolic blood pressure                 | Continuous | -107 mmHg, 108-130 mmHg, 131-145 mmHg, 146- mmHg, Unknown | Discretization and one hot encoding<br>Cutoff values for categories were calculated from median and interquartile range of training cohort<br>Missing data were classified into unknown |
| Diastolic blood pressure     | blood | Diastolic blood pressure                | Continuous | -69 mmHg, 70-80 mmHg, 81-91 mmHg, 92- mmHg, Unknown       | Discretization and one hot encoding<br>Cutoff values for categories were calculated from median and interquartile range of training cohort<br>Missing data were classified into unknown |
| Heart rate                   |       | Heart rate                              | Continuous | -74/min, 75-86/min, 87-99/min, 100-/min, Unknown          | Discretization and one hot encoding<br>Cutoff values for categories were calculated from median and interquartile range of training cohort<br>Missing data were classified into unknown |
| Respiratory rate             |       | Respiratory rate                        | Continuous | -16/min, 17-18/min, 19-20/min, 21-/min, Unknown           | Discretization and one hot encoding<br>Cutoff values for categories were calculated from median and interquartile range of training cohort<br>Missing data were classified into unknown |
| Oxygen saturation            |       | Oxygen saturation                       | Continuous | -95%, 96-98%, 99%, 100%, Unknown                          | Discretization and one hot encoding<br>Cutoff values for categories were calculated from median and interquartile range of training cohort<br>Missing data were classified into unknown |
| Body temperature             |       | Body temperature                        | Continuous | -36°C, 36.1-36.3°C, 36.4-36.8°C, 36.9-°C, Unknown         | Discretization and one hot encoding<br>Cutoff values for categories were calculated from median and interquartile range of training cohort<br>Missing data were classified into unknown |
| Chest pain or abdominal pain |       | Symptom of chest pain or abdominal pain | Binary     | Yes, No                                                   |                                                                                                                                                                                         |

|                                   |                                                                                                                            |        |         |  |
|-----------------------------------|----------------------------------------------------------------------------------------------------------------------------|--------|---------|--|
| Fracture, abrasion, or laceration | Symptom of fracture, abrasion, or laceration                                                                               | Binary | Yes, No |  |
| Loss of consciousness             | Symptom of loss of consciousness (whether patients had loss of consciousness between injury and EMS provider's assessment) | Binary | Yes, No |  |
| Dyspnea                           | Symptom of dyspnea                                                                                                         | Binary | Yes, No |  |
| Nose bleeding                     | Symptom of nose bleeding                                                                                                   | Binary | Yes, No |  |
| Nausea or vomiting                | Symptom of nausea or vomiting                                                                                              | Binary | Yes, No |  |
| Headache, paralysis or dizziness  | Symptom of headache, paralysis or dizziness                                                                                | Binary | Yes, No |  |



Supplementary Table 2. Demographic characteristics of development and test cohorts

| Characteristics                                 | N (%) or Median (IQR) |             |            | P-value |
|-------------------------------------------------|-----------------------|-------------|------------|---------|
|                                                 | Total                 | Development | Test       |         |
| Total                                           | 1169                  | 867         | 302        |         |
| Demographics                                    |                       |             |            |         |
| Male                                            | 809 (69.2)            | 592 (68.3)  | 217 (71.9) | 0.25    |
| Age, years                                      | 53 (36-66)            | 52 (35-66)  | 56 (40-69) | <0.01   |
| Job of patients                                 |                       |             |            | <0.01   |
| Unemployed                                      | 299 (25.6)            | 197 (22.7)  | 102 (33.8) |         |
| Student/Housewife                               | 161 (13.8)            | 129 (14.9)  | 32 (10.6)  |         |
| Office/Commercial/Service worker                | 283 (24.2)            | 176 (20.3)  | 107 (35.4) |         |
| Industrial/Agricultural/Fishery/Minery worker   | 36 (3.1)              | 25 (2.9)    | 11 (3.6)   |         |
| Others                                          | 390 (33.4)            | 340 (39.2)  | 50 (16.6)  |         |
| Past medical history                            |                       |             |            |         |
| Diabetes                                        | 62 (5.3)              | 35 (4.0)    | 27 (8.9)   | <0.01   |
| Hypertension                                    | 105 (9.0)             | 61 (7.0)    | 44 (14.6)  | <0.01   |
| Circumstances of Trauma                         |                       |             |            |         |
| Location of trauma                              |                       |             |            | 0.52    |
| Residential/Nursing/Education/Exercise facility | 303 (25.9)            | 218 (25.1)  | 85 (28.1)  |         |
| Road/Highway                                    | 444 (38.0)            | 326 (37.6)  | 118 (39.1) |         |
| Off-road traffic area                           | 181 (15.5)            | 140 (16.1)  | 41 (13.6)  |         |
| Others                                          | 241 (20.6)            | 183 (21.1)  | 58 (19.2)  |         |
| Season of trauma                                |                       |             |            | <0.01   |
| Spring                                          | 249 (21.3)            | 167 (19.3)  | 82 (27.2)  |         |
| Summer                                          | 336 (28.7)            | 253 (29.2)  | 83 (27.5)  |         |
| Fall                                            | 304 (26.0)            | 242 (27.9)  | 62 (20.5)  |         |
| Winter                                          | 280 (24.0)            | 205 (23.6)  | 75 (24.8)  |         |
| Weekday                                         | 811 (69.4)            | 599 (69.1)  | 212 (70.2) | 0.72    |
| Time of trauma                                  |                       |             |            | 0.83    |
| 6A-MD                                           | 281 (24.0)            | 206 (23.8)  | 75 (24.8)  |         |
| MD-6P                                           | 266 (22.8)            | 203 (23.4)  | 63 (20.9)  |         |
| 6P-MN                                           | 361 (30.9)            | 265 (30.6)  | 96 (31.8)  |         |
| MN-6A                                           | 261 (22.3)            | 193 (22.3)  | 68 (22.5)  |         |
| Mechanism of Trauma                             |                       |             |            |         |
| Traffic accident                                | 500 (42.8)            | 375 (43.3)  | 125 (41.4) | 0.60    |
| Slip down                                       | 325 (27.8)            | 232 (26.8)  | 93 (30.8)  |         |
| Fall down                                       | 171 (14.6)            | 129 (14.9)  | 42 (13.9)  |         |
| Others                                          | 173 (14.8)            | 131 (15.1)  | 42 (13.9)  |         |
| Chief complaint                                 |                       |             |            |         |
| Altered mentality                               | 279 (23.9)            | 223 (25.7)  | 56 (18.5)  | 0.01    |
| Fracture/Abrasion/Laceration                    | 302 (25.8)            | 204 (23.5)  | 98 (32.5)  | <0.01   |
| Chest/Abdominal pain                            | 47 (4.0)              | 31 (3.6)    | 16 (5.3)   | 0.19    |
| Dyspnea                                         | 25 (2.1)              | 20 (2.3)    | 5 (1.7)    | 0.50    |

|    |                                      |            |                |             |       |
|----|--------------------------------------|------------|----------------|-------------|-------|
| 1  |                                      |            |                |             |       |
| 2  |                                      |            |                |             |       |
| 3  |                                      |            |                |             |       |
| 4  |                                      |            |                |             |       |
| 5  | Epistaxis                            | 44 (3.8)   | 30 (3.5)       | 14 (4.6)    | 0.36  |
| 6  | Headache/Paralysis/Dizziness/Vertigo | 95 (8.1)   | 64 (7.4)       | 31 (10.3)   | 0.11  |
| 7  | Nausea/Vomiting                      | 32 (2.7)   | 20 (2.3)       | 12 (4.0)    | 0.13  |
| 8  | EMS Vital sign assessment            |            |                |             |       |
| 9  |                                      | 130 (109-  |                | 131 (115-   |       |
| 10 | SBP, mmHg                            | 150)       | 130 (104-146)  | 150)        | <0.01 |
| 11 | Missing                              | 65 (5.6)   | 56 (6.5)       | 9 (3.0)     | 0.02  |
| 12 | DBP, mmHg                            | 80 (70-91) | 80 (69-90)     | 80 (70-92)  | <0.01 |
| 13 | Missing                              | 75 (6.4)   | 65 (7.5)       | 10 (3.3)    | 0.01  |
| 14 | HR, /min                             | 86 (75-99) | 86 (74-99)     | 86 (76-100) | <0.01 |
| 15 | Missing                              | 31 (2.7)   | 28 (3.2)       | 3 (1.0)     | 0.04  |
| 16 | RR, /min                             | 18 (16-20) | 18 (16-20)     | 18 (16-20)  | <0.01 |
| 17 | Missing                              | 36 (3.1)   | 33 (3.8)       | 3 (1.0)     | 0.01  |
| 18 | SpO2, %                              | 98 (95-99) | 98 (95-99)     | 98 (96-99)  | <0.01 |
| 19 | Missing                              | 38 (3.3)   | 33 (3.8)       | 5 (1.7)     | 0.07  |
| 20 | Temperature, °C                      | 36.5 (36-  |                | 36.5 (36-   |       |
| 21 |                                      | 36.8)      | 36.5 (36-36.8) | 36.7)       | <0.01 |
| 22 | Missing                              | 94 (8.0)   | 65 (7.5)       | 29 (9.6)    | 0.25  |
| 23 | AVPU scale                           |            |                |             | <0.01 |
| 24 | Alert                                | 714 (61.1) | 504 (58.1)     | 210 (69.5)  |       |
| 25 | Verbal                               | 168 (14.4) | 136 (15.7)     | 32 (10.6)   |       |
| 26 | Pain                                 | 199 (17.0) | 158 (18.2)     | 41 (13.6)   |       |
| 27 | Unresponsive                         | 88 (7.5)   | 69 (8.0)       | 19 (6.3)    |       |
| 28 | Abnormal light reflex                | 165 (14.1) | 132 (15.2)     | 33 (10.9)   | <0.01 |
| 29 | Missing                              | 66 (5.6)   | 57 (6.6)       | 9 (3.0)     |       |
| 30 | GCS scale component                  |            |                |             |       |
| 31 | Glasgow coma scale eye               |            |                |             | <0.01 |
| 32 | 4                                    | 558 (47.7) | 380 (43.8)     | 178 (58.9)  |       |
| 33 | 3                                    | 128 (10.9) | 109 (12.6)     | 19 (6.3)    |       |
| 34 | 2                                    | 110 (9.4)  | 82 (9.5)       | 28 (9.3)    |       |
| 35 | 1                                    | 174 (14.9) | 141 (16.3)     | 33 (10.9)   |       |
| 36 | Unknown                              | 199 (17.0) | 155 (17.9)     | 44 (14.6)   |       |
| 37 | Glasgow coma scale Verbal            |            |                |             | 0.01  |
| 38 | 5                                    | 520 (44.5) | 359 (41.4)     | 161 (53.3)  |       |
| 39 | 4                                    | 118 (10.1) | 88 (10.1)      | 30 (9.9)    |       |
| 40 | 3                                    | 25 (2.1)   | 19 (2.2)       | 6 (2.0)     |       |
| 41 | 2                                    | 132 (11.3) | 105 (12.1)     | 27 (8.9)    |       |
| 42 | 1                                    | 174 (14.9) | 141 (16.3)     | 33 (10.9)   |       |
| 43 | Unknown                              | 200 (17.1) | 155 (17.9)     | 45 (14.9)   |       |
| 44 | Glasgow coma scale Motor             |            |                |             | <0.01 |
| 45 | 6                                    | 499 (42.7) | 333 (38.4)     | 166 (55.0)  |       |
| 46 | 5                                    | 124 (10.6) | 103 (11.9)     | 21 (7.0)    |       |
| 47 | 4                                    | 158 (13.5) | 123 (14.2)     | 35 (11.6)   |       |
| 48 | 3                                    | 47 (4.0)   | 39 (4.5)       | 8 (2.6)     |       |
| 49 | 2                                    | 17 (1.5)   | 15 (1.7)       | 2 (0.7)     |       |
| 50 | 1                                    | 125 (10.7) | 99 (11.4)      | 26 (8.6)    |       |
| 51 | Unknown                              | 199 (17.0) | 155 (17.9)     | 44 (14.6)   |       |
| 52 |                                      |            |                |             |       |
| 53 |                                      |            |                |             |       |
| 54 |                                      |            |                |             |       |
| 55 |                                      |            |                |             |       |
| 56 |                                      |            |                |             |       |
| 57 |                                      |            |                |             |       |
| 58 |                                      |            |                |             |       |
| 59 |                                      |            |                |             |       |
| 60 |                                      |            |                |             |       |

|    |                                         |            |            |            |       |
|----|-----------------------------------------|------------|------------|------------|-------|
| 1  |                                         |            |            |            |       |
| 2  |                                         |            |            |            |       |
| 3  |                                         |            |            |            |       |
| 4  |                                         |            |            |            |       |
| 5  | EMS management                          |            |            |            |       |
| 6  | Intravenous route                       | 176 (15.1) | 129 (14.9) | 47 (15.6)  | 0.77  |
| 7  | Hemorrhage control                      | 586 (50.1) | 426 (49.1) | 160 (53.0) | 0.25  |
| 8  | Spinal motion restriction               | 811 (69.4) | 606 (69.9) | 205 (67.9) | 0.51  |
| 9  | Advanced airway management              | 4 (0.3)    | 2 (0.2)    | 2 (0.7)    | 0.28  |
| 10 | Oxygen supply                           | 233 (19.9) | 176 (20.3) | 57 (18.9)  | 0.59  |
| 11 |                                         |            |            |            |       |
| 12 | Field triage decision scheme criteria*  |            |            |            |       |
| 13 | Physiological criteria                  |            |            |            |       |
| 14 | SBP<90 mmHg                             | 58 (5.0)   | 42 (4.8)   | 16 (5.3)   | 0.75  |
| 15 | RR<10 or >29 /min                       | 11 (0.9)   | 11 (1.3)   | 0 (0.0)    | 0.08  |
| 16 | Non-Alert                               | 429 (36.7) | 343 (39.6) | 86 (28.5)  | <0.01 |
| 17 |                                         |            |            |            |       |
| 18 | Anatomic criteria                       |            |            |            |       |
| 19 | All penetrating injuries to head, neck, |            |            |            |       |
| 20 | torso and extremities proximal to elbow |            |            |            |       |
| 21 | or knee                                 | 34 (2.9)   | 23 (2.7)   | 11 (3.6)   | 0.38  |
| 22 | Chest wall instability or deformity     | 4 (0.3)    | 4 (0.5)    | 0 (0.0)    | 0.58  |
| 23 | Two or more proximal long bone          |            |            |            |       |
| 24 | fractures                               | 19 (1.6)   | 13 (1.5)   | 6 (2.0)    | 0.60  |
| 25 | Crush, degloved, mangled or             |            |            |            |       |
| 26 | pulseless extremity                     | 15 (1.3)   | 13 (1.5)   | 2 (0.7)    | 0.38  |
| 27 | Amputation proximal to wrist or ankle   | 9 (0.8)    | 9 (1.0)    | 0 (0.0)    | 0.12  |
| 28 | Pelvic fractures                        | 8 (0.7)    | 6 (0.7)    | 2 (0.7)    | >0.95 |
| 29 | Open or depressed skull fracture        | 17 (1.5)   | 9 (1.0)    | 8 (2.6)    | 0.05  |
| 30 | Paralysis                               | 21 (1.8)   | 11 (1.3)   | 10 (3.3)   | 0.02  |
| 31 |                                         |            |            |            |       |
| 32 | Mechanism of injury criteria            |            |            |            |       |
| 33 | Fall > 6 meter                          | 113 (9.7)  | 84 (9.7)   | 29 (9.6)   | >0.95 |
| 34 | High-risk auto crash                    | 96 (8.2)   | 73 (8.4)   | 23 (7.6)   | 0.66  |
| 35 | Auto vs pedestrian/bicyclist thrown,    |            |            |            |       |
| 36 | run over, or with significant (>30km/h) |            |            |            |       |
| 37 | impact                                  | 119 (10.2) | 83 (9.6)   | 36 (11.9)  | 0.25  |
| 38 | Motorcycle crash > 30 km/hour           | 105 (9.0)  | 70 (8.1)   | 35 (11.6)  | 0.07  |
| 39 |                                         |            |            |            |       |
| 40 | ED disposition                          |            |            |            | 0.11  |
| 41 |                                         |            |            |            |       |
| 42 | Discharge                               | 320 (27.4) | 241 (27.8) | 79 (26.2)  |       |
| 43 | Transfer                                | 444 (38.0) | 316 (36.4) | 128 (42.4) |       |
| 44 | Admitted                                | 366 (31.3) | 276 (31.8) | 90 (29.8)  |       |
| 45 | In-hospital mortality                   | 90 (7.7)   | 74 (8.5)   | 16 (5.3)   | 0.07  |
| 46 |                                         |            |            |            |       |
| 47 | Outcomes                                |            |            |            |       |
| 48 |                                         |            |            |            |       |
| 49 | TBI                                     | 281 (24.0) | 215 (24.8) | 66 (21.9)  | 0.30  |
| 50 | TBI with intracranial injury            | 251 (21.5) | 195 (22.5) | 56 (18.5)  | 0.15  |
| 51 | TBI-related non-discharge               | 249 (21.3) | 192 (22.1) | 57 (18.9)  | 0.23  |
| 52 | TBI-related death                       | 43 (3.7)   | 32 (3.7)   | 11 (3.6)   | >0.95 |

\*EMS providers check specific criteria orderly from physiologic, anatomical, and mechanism of injury. If the preceding criteria are satisfied, the information of the latter criteria is not collected.

1  
2  
3  
4 IQR, interquartile range; SBP, systolic blood pressure; RR, respiratory rate; ED, emergency department; TBI,  
5  
6 traumatic brain injury.  
7  
8  
9  
10  
11  
12  
13  
14  
15  
16  
17  
18  
19  
20  
21  
22  
23  
24  
25  
26  
27  
28  
29  
30  
31  
32  
33  
34  
35  
36  
37  
38  
39  
40  
41  
42  
43  
44  
45  
46  
47  
48  
49  
50  
51  
52  
53  
54  
55  
56  
57  
58  
59  
60

For peer review only

Supplementary Table 3. Hyperparameters of the final prediction models\*

| Model                     | Outcome | Hyperparameters                                                                                                                           |
|---------------------------|---------|-------------------------------------------------------------------------------------------------------------------------------------------|
| Elastic net               | TBI     | alpha: 0.325, lambda: 0.07506346                                                                                                          |
|                           | TBI-I   | alpha: 0.325, lambda: 0.07506346                                                                                                          |
|                           | TBI-ND  | alpha: 0.325, lambda: 0.07017153                                                                                                          |
|                           | TBI-D   | alpha: 0.325, lambda: 0.01565599                                                                                                          |
| Random forest             | TBI     | ntree:500, mtry: 18                                                                                                                       |
|                           | TBI-I   | ntree:500, mtry: 18                                                                                                                       |
|                           | TBI-ND  | ntree:500, mtry: 18                                                                                                                       |
|                           | TBI-D   | ntree:500, mtry: 15                                                                                                                       |
| Support vector machine    | TBI     | sigma: 0.008047; C: 4                                                                                                                     |
|                           | TBI-I   | sigma: 0.008047; C: 4                                                                                                                     |
|                           | TBI-ND  | sigma: 0.008047; C: 4                                                                                                                     |
|                           | TBI-D   | sigma: 0.008047; C: 4                                                                                                                     |
| Extreme gradient boosting | TBI     | nrounds: 299; max_depth: 1; eta: 0.4807096; gamma: 2.336623;<br>colsample_bytree: 0.3657893; min_child_weight: 8; subsample:<br>0.8182623 |
|                           | TBI-I   | nrounds: 299; max_depth: 1; eta: 0.4807096; gamma: 2.336623;<br>colsample_bytree: 0.3657893; min_child_weight: 8; subsample:<br>0.8182623 |
|                           | TBI-ND  | nrounds: 301; max_depth: 1; eta: 0.02154674; gamma: 4.696105;<br>colsample_bytree: 0.590754; min_child_weight: 1; subsample:<br>0.5070866 |
|                           | TBI-D   | nrounds: 50; max_depth: 0.3; eta: 0.3; gamma: 0;<br>colsample_bytree: 0.8; min_child_weight: 1; subsample:<br>0.5510204                   |

\*Aside from the hyperparameters mentioned, all other hyperparameters are used as the default value.

TBI, traumatic brain injury; TBI-I, TBI with intracranial hemorrhage or injury; TBI-ND, TBI non-discharge; TBI-D, TBI with death.

Supplementary Figure 1. Receiver operating characteristics of prediction models according to outcomes. TBI, traumatic brain injury; TBI-I, TBI with intracranial hemorrhage or injury; TBI-ND, TBI non-discharge; TBI-D, TBI with death.

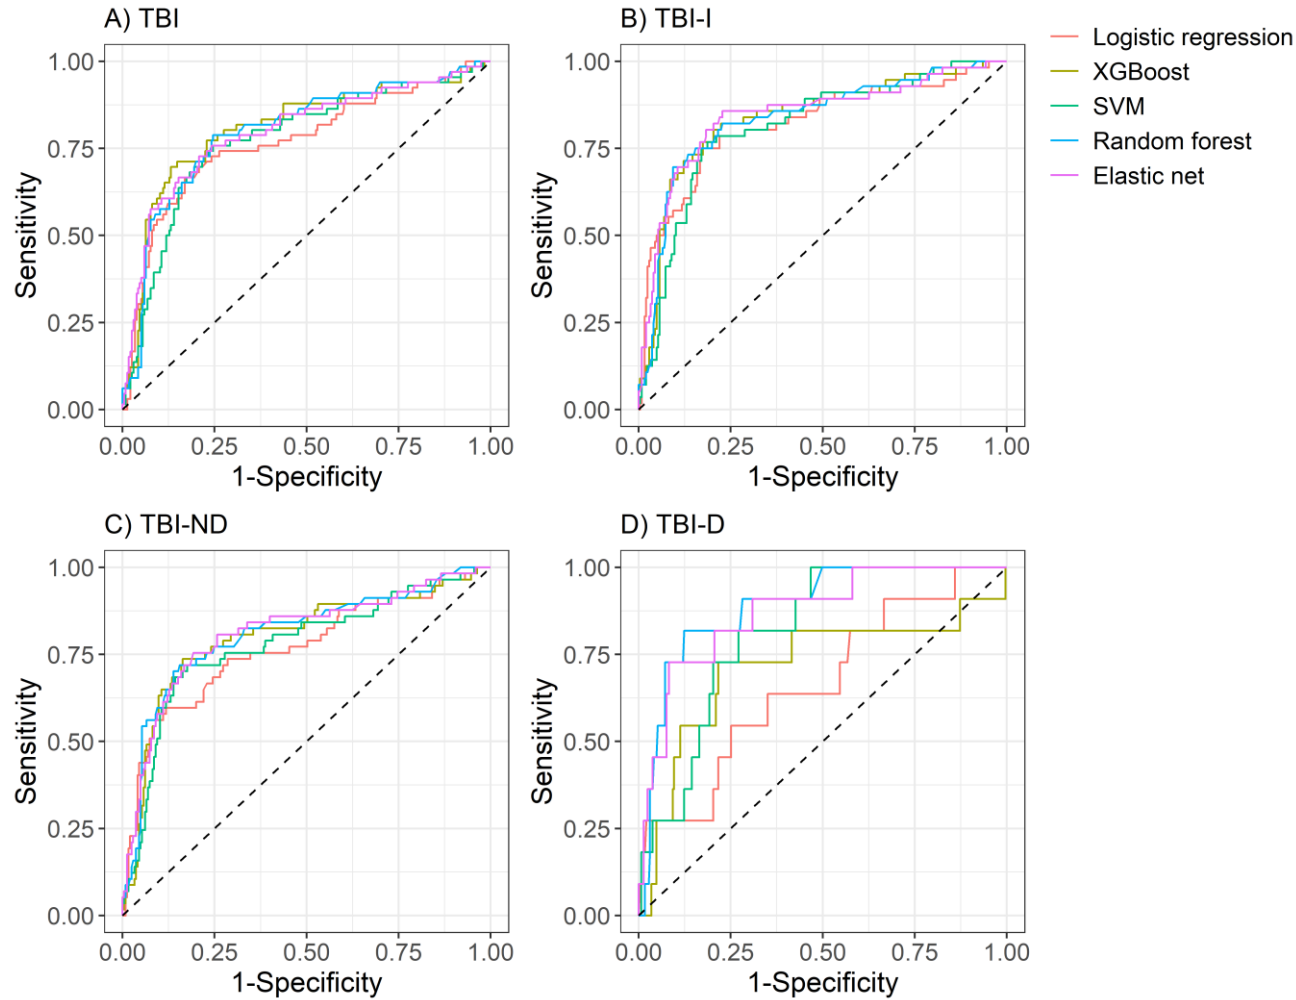

Supplementary Figure 2. Precision-recall curve of prediction models according to outcomes. TBI, traumatic brain injury; TBI-I, TBI with intracranial hemorrhage or injury; TBI-ND, TBI non-discharge; TBI-D, TBI with death; LR, logistic regression analysis; XGB, extreme gradient boosting; RF, random forest, EN, elastic net.



Supplementary Figure 3. Calibration plot of prediction models according to outcomes. TBI, traumatic brain injury; TBI-I, TBI with intracranial hemorrhage or injury; TBI-ND, TBI non-discharge; TBI-D, TBI with death; p, p-value of Hosmer-Lemeshow test; BS, scaled Brier score.





1  
2  
3  
4  
5  
6  
7  
8  
9  
10  
11  
12  
13  
14  
15  
16  
17  
18  
19  
20  
21  
22  
23  
24  
25  
26  
27  
28  
29  
30  
31  
32  
33  
34  
35  
36  
37  
38  
39  
40  
41  
42  
43  
44  
45  
46

For peer review only

Supplementary Table 4. Example of calculating false-positive patients for accurately identified patients. TBI, traumatic brain injury; EN, elastic net.

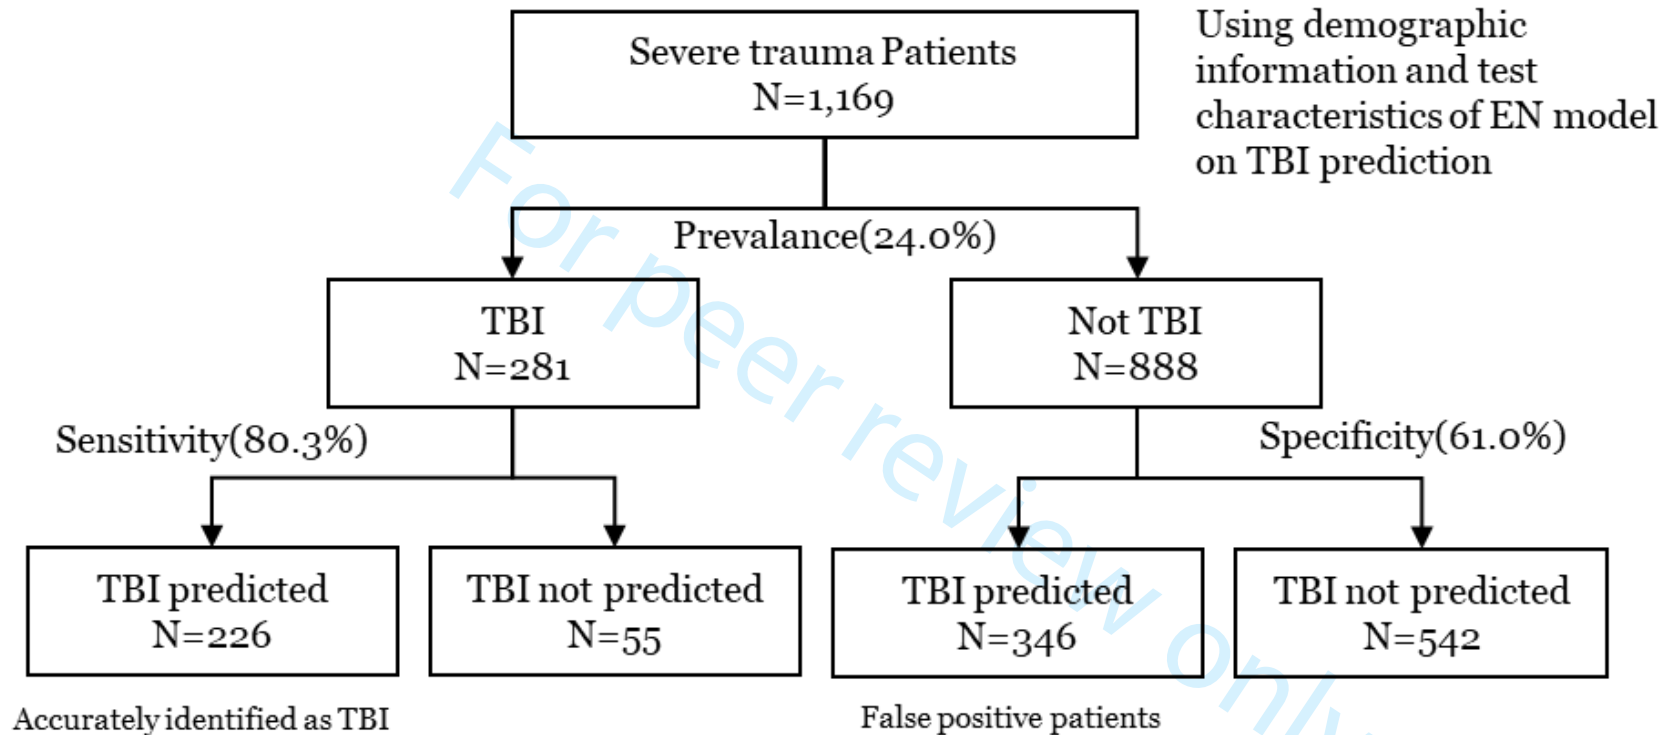

False-positive patients for every 10 patients that are accurately identified as TBI :  
 $346/226 \times 10 = 15.3$ , rounded up to 16 patients

## TRIPOD Checklist: Prediction Model Development and Validation

| Section/Topic                | Item | Checklist Item                                                                                                                                                                                            | Page  |
|------------------------------|------|-----------------------------------------------------------------------------------------------------------------------------------------------------------------------------------------------------------|-------|
| <b>Title and abstract</b>    |      |                                                                                                                                                                                                           |       |
| Title                        | 1    | D;V Identify the study as developing and/or validating a multivariable prediction model, the target population, and the outcome to be predicted.                                                          | 1     |
| Abstract                     | 2    | D;V Provide a summary of objectives, study design, setting, participants, sample size, predictors, outcome, statistical analysis, results, and conclusions.                                               | 4     |
| <b>Introduction</b>          |      |                                                                                                                                                                                                           |       |
| Background and objectives    | 3a   | D;V Explain the medical context (including whether diagnostic or prognostic) and rationale for developing or validating the multivariable prediction model, including references to existing models.      | 7     |
|                              | 3b   | D;V Specify the objectives, including whether the study describes the development or validation of the model or both.                                                                                     | 8     |
| <b>Methods</b>               |      |                                                                                                                                                                                                           |       |
| Source of data               | 4a   | D;V Describe the study design or source of data (e.g., randomized trial, cohort, or registry data), separately for the development and validation data sets, if applicable.                               | 8-9   |
|                              | 4b   | D;V Specify the key study dates, including start of accrual; end of accrual; and, if applicable, end of follow-up.                                                                                        | 9     |
| Participants                 | 5a   | D;V Specify key elements of the study setting (e.g., primary care, secondary care, general population) including number and location of centres.                                                          | 8-9   |
|                              | 5b   | D;V Describe eligibility criteria for participants.                                                                                                                                                       | 10    |
|                              | 5c   | D;V Give details of treatments received, if relevant.                                                                                                                                                     | N/A   |
| Outcome                      | 6a   | D;V Clearly define the outcome that is predicted by the prediction model, including how and when assessed.                                                                                                | 10-11 |
|                              | 6b   | D;V Report any actions to blind assessment of the outcome to be predicted.                                                                                                                                | N/A   |
| Predictors                   | 7a   | D;V Clearly define all predictors used in developing or validating the multivariable prediction model, including how and when they were measured.                                                         | 11    |
|                              | 7b   | D;V Report any actions to blind assessment of predictors for the outcome and other predictors.                                                                                                            | N/A   |
| Sample size                  | 8    | D;V Explain how the study size was arrived at.                                                                                                                                                            | 14    |
| Missing data                 | 9    | D;V Describe how missing data were handled (e.g., complete-case analysis, single imputation, multiple imputation) with details of any imputation method.                                                  | 11    |
| Statistical analysis methods | 10a  | D Describe how predictors were handled in the analyses.                                                                                                                                                   | 11    |
|                              | 10b  | D Specify type of model, all model-building procedures (including any predictor selection), and method for internal validation.                                                                           | 11-12 |
|                              | 10c  | V For validation, describe how the predictions were calculated.                                                                                                                                           | 12-13 |
|                              | 10d  | D;V Specify all measures used to assess model performance and, if relevant, to compare multiple models.                                                                                                   | 12-13 |
|                              | 10e  | V Describe any model updating (e.g., recalibration) arising from the validation, if done.                                                                                                                 | N/A   |
| Risk groups                  | 11   | D;V Provide details on how risk groups were created, if done.                                                                                                                                             | N/A   |
| Development vs. validation   | 12   | V For validation, identify any differences from the development data in setting, eligibility criteria, outcome, and predictors.                                                                           | 12    |
| <b>Results</b>               |      |                                                                                                                                                                                                           |       |
| Participants                 | 13a  | D;V Describe the flow of participants through the study, including the number of participants with and without the outcome and, if applicable, a summary of the follow-up time. A diagram may be helpful. | 14    |
|                              | 13b  | D;V Describe the characteristics of the participants (basic demographics, clinical features, available predictors), including the number of participants with missing data for predictors and outcome.    | 14    |
|                              | 13c  | V For validation, show a comparison with the development data of the distribution of important variables (demographics, predictors and outcome).                                                          | 14    |
| Model development            | 14a  | D Specify the number of participants and outcome events in each analysis.                                                                                                                                 | 14    |
|                              | 14b  | D If done, report the unadjusted association between each candidate predictor and outcome.                                                                                                                | N/A   |
| Model specification          | 15a  | D Present the full prediction model to allow predictions for individuals (i.e., all regression coefficients, and model intercept or baseline survival at a given time point).                             | N/A   |
|                              | 15b  | D Explain how to use the prediction model.                                                                                                                                                                | 14-15 |
| Model performance            | 16   | D;V Report performance measures (with CIs) for the prediction model.                                                                                                                                      | 14-15 |
| Model-updating               | 17   | V If done, report the results from any model updating (i.e., model specification, model performance).                                                                                                     | N/A   |
| <b>Discussion</b>            |      |                                                                                                                                                                                                           |       |
| Limitations                  | 18   | D;V Discuss any limitations of the study (such as nonrepresentative sample, few events per predictor, missing data).                                                                                      | 19-20 |
| Interpretation               | 19a  | V For validation, discuss the results with reference to performance in the development data, and any other validation data.                                                                               | 16-17 |
|                              | 19b  | D;V Give an overall interpretation of the results, considering objectives, limitations, results from similar studies, and other relevant evidence.                                                        | 16    |
| Implications                 | 20   | D;V Discuss the potential clinical use of the model and implications for future research.                                                                                                                 | 18-19 |
| <b>Other information</b>     |      |                                                                                                                                                                                                           |       |
| Supplementary information    | 21   | D;V Provide information about the availability of supplementary resources, such as study protocol, Web calculator, and data sets.                                                                         | Suppl |
| Funding                      | 22   | D;V Give the source of funding and the role of the funders for the present study.                                                                                                                         | 20    |

\*Items relevant only to the development of a prediction model are denoted by D, items relating solely to a validation of a prediction model are denoted by V, and items relating to both are denoted D;V. We recommend using the TRIPOD Checklist in conjunction with the TRIPOD Explanation and Elaboration document.
