# Supplementary material for: Development and validation of a prehospital-stage prediction tool for traumatic brain injury: a multicentre retrospective cohort study in Korea
Source: PubMed Central journal article supplement — BMJ Open. 2022 Jan 12;12(1):e055918. doi: 10.1136/bmjopen-2021-055918 (PMC8756263; doi:10.1136/bmjopen-2021-055918), 2022-01-12
Supplement: bmjopen-2021-055918supp001.pdf [file bmjopen-2021-055918supp001.pdf]

Supplementary Table 1. List of analyzed variables.

| Variables                 | Descriptions                                  | Type of raw data | Category                                                                                                               | Preprocessing                                                     |
|---------------------------|-----------------------------------------------|------------------|------------------------------------------------------------------------------------------------------------------------|-------------------------------------------------------------------|
| Gender                    | Sex of the patients                           | Binary           | Male, Female                                                                                                           |                                                                   |
| Age                       | Age of patients                               | Continuous       | 15-39 years, 40-59 years, 60-79 years, and 80- years                                                                   | Discretization and one hot encoding                               |
| Job                       | Job of patients                               | Categorical      | Unemployed, Student/Housewife; Office/Commercial/Service workers; Industrial/Agricultural/Fishery/Miner worker; Others | One hot encoding<br>Missing data were classified into others      |
| Diabetes                  | History of diabetes mellitus                  | Binary           | Yes, No                                                                                                                | Missing data were classified into no                              |
| Hypertension              | History of hypertension                       | Binary           | Yes, No                                                                                                                | Missing data were classified into no                              |
| Location of injury        | Location of injury                            | Categorical      | home/residential area/medical facility/school/gym; Road/highway; Off-road traffic area; Others                         | One hot encoding<br>Missing data were classified into others      |
| Season                    | Season when injury occurred                   | Categorical      | Spring, Summer, Fall, Winter                                                                                           | One hot encoding                                                  |
| Weekend                   | Whether Injury occurred on weekday or weekend | Binary           | Weekday, Weekend                                                                                                       |                                                                   |
| Daytime                   | When injury was occurred                      | Categorical      | Night (Midnight to 5AM), Morning (6AM to 11AM), Afternoon (Midday to 5PM), Evening (6PM to 11PM)                       | One hot encoding<br>Missing time were imputed using EMS call time |
| Mechanism of injury       | Mechanism of injury                           | Categorical      | Slip down, Fall down, Traffic accident, Other                                                                          | One hot encoding<br>Missing data were classified into others      |
| Glasgow coma scale eye    | Eye element of Glasgow coma scale             | Categorical      | 1;2;3;4;Unknown                                                                                                        | One hot encoding                                                  |
| Glasgow coma scale Verbal | Verbal element of Glasgow coma scale          | Categorical      | 1;2;3;4;5;Unknown                                                                                                      | One hot encoding                                                  |
| Glasgow coma scale Motor  | Motor element of Glasgow coma scale           | Categorical      | 1;2;3;4;5;6;Unknown                                                                                                    | One hot encoding                                                  |
| Light Reflex any Abnormal | Any abnormality of light reflex on any side   | Categorical      | No, Yes, Unknown                                                                                                       | One hot encoding<br>Missing data were classified into unknown     |

|                              |                                         |            |                                                           |                                                                                                                                                                                         |
|------------------------------|-----------------------------------------|------------|-----------------------------------------------------------|-----------------------------------------------------------------------------------------------------------------------------------------------------------------------------------------|
| Systolic blood pressure      | Systolic blood pressure                 | Continuous | -107 mmHg, 108-130 mmHg, 131-145 mmHg, 146- mmHg, Unknown | Discretization and one hot encoding<br>Cutoff values for categories were calculated from median and interquartile range of training cohort<br>Missing data were classified into unknown |
| Diastolic blood pressure     | Diastolic blood pressure                | Continuous | -69 mmHg, 70-80 mmHg, 81-91 mmHg, 92- mmHg, Unknown       | Discretization and one hot encoding<br>Cutoff values for categories were calculated from median and interquartile range of training cohort<br>Missing data were classified into unknown |
| Heart rate                   | Heart rate                              | Continuous | -74/min, 75-86/min, 87-99/min, 100-/min, Unknown          | Discretization and one hot encoding<br>Cutoff values for categories were calculated from median and interquartile range of training cohort<br>Missing data were classified into unknown |
| Respiratory rate             | Respiratory rate                        | Continuous | -16/min, 17-18/min, 19-20/min, 21-/min, Unknown           | Discretization and one hot encoding<br>Cutoff values for categories were calculated from median and interquartile range of training cohort<br>Missing data were classified into unknown |
| Oxygen saturation            | Oxygen saturation                       | Continuous | -95%, 96-98%, 99%, 100%, Unknown                          | Discretization and one hot encoding<br>Cutoff values for categories were calculated from median and interquartile range of training cohort<br>Missing data were classified into unknown |
| Body temperature             | Body temperature                        | Continuous | -36°C, 36.1-36.3°C, 36.4-36.8°C, 36.9-°C, Unknown         | Discretization and one hot encoding<br>Cutoff values for categories were calculated from median and interquartile range of training cohort<br>Missing data were classified into unknown |
| Chest pain or abdominal pain | Symptom of chest pain or abdominal pain | Binary     | Yes, No                                                   |                                                                                                                                                                                         |

|                                   |                                                                                                                            |        |         |  |
|-----------------------------------|----------------------------------------------------------------------------------------------------------------------------|--------|---------|--|
| Fracture, abrasion, or laceration | Symptom of fracture, abrasion, or laceration                                                                               | Binary | Yes, No |  |
| Loss of consciousness             | Symptom of loss of consciousness (whether patients had loss of consciousness between injury and EMS provider's assessment) | Binary | Yes, No |  |
| Dyspnea                           | Symptom of dyspnea                                                                                                         | Binary | Yes, No |  |
| Nose bleeding                     | Symptom of nose bleeding                                                                                                   | Binary | Yes, No |  |
| Nausea or vomiting                | Symptom of nausea or vomiting                                                                                              | Binary | Yes, No |  |
| Headache, paralysis or dizziness  | Symptom of headache, paralysis or dizziness                                                                                | Binary | Yes, No |  |

Supplementary Table 2. Demographic characteristics of development and test cohorts

| Characteristics                                 | N (%) or Median (IQR) |             |            | P-value |
|-------------------------------------------------|-----------------------|-------------|------------|---------|
|                                                 | Total                 | Development | Test       |         |
| Total                                           | 1169                  | 867         | 302        |         |
| Demographics                                    |                       |             |            |         |
| Male                                            | 809 (69.2)            | 592 (68.3)  | 217 (71.9) | 0.25    |
| Age, years                                      | 53 (36-66)            | 52 (35-66)  | 56 (40-69) | <0.01   |
| Job of patients                                 |                       |             |            | <0.01   |
| Unemployed                                      | 299 (25.6)            | 197 (22.7)  | 102 (33.8) |         |
| Student/Housewife                               | 161 (13.8)            | 129 (14.9)  | 32 (10.6)  |         |
| Office/Commercial/Service worker                | 283 (24.2)            | 176 (20.3)  | 107 (35.4) |         |
| Industrial/Agricultural/Fishery/Minery worker   | 36 (3.1)              | 25 (2.9)    | 11 (3.6)   |         |
| Others                                          | 390 (33.4)            | 340 (39.2)  | 50 (16.6)  |         |
| Past medical history                            |                       |             |            |         |
| Diabetes                                        | 62 (5.3)              | 35 (4.0)    | 27 (8.9)   | <0.01   |
| Hypertension                                    | 105 (9.0)             | 61 (7.0)    | 44 (14.6)  | <0.01   |
| Circumstances of Trauma                         |                       |             |            |         |
| Location of trauma                              |                       |             |            | 0.52    |
| Residential/Nursing/Education/Exercise facility | 303 (25.9)            | 218 (25.1)  | 85 (28.1)  |         |
| Road/Highway                                    | 444 (38.0)            | 326 (37.6)  | 118 (39.1) |         |
| Off-road traffic area                           | 181 (15.5)            | 140 (16.1)  | 41 (13.6)  |         |
| Others                                          | 241 (20.6)            | 183 (21.1)  | 58 (19.2)  |         |
| Season of trauma                                |                       |             |            | <0.01   |
| Spring                                          | 249 (21.3)            | 167 (19.3)  | 82 (27.2)  |         |
| Summer                                          | 336 (28.7)            | 253 (29.2)  | 83 (27.5)  |         |
| Fall                                            | 304 (26.0)            | 242 (27.9)  | 62 (20.5)  |         |
| Winter                                          | 280 (24.0)            | 205 (23.6)  | 75 (24.8)  |         |
| Weekday                                         | 811 (69.4)            | 599 (69.1)  | 212 (70.2) | 0.72    |
| Time of trauma                                  |                       |             |            | 0.83    |
| 6A-MD                                           | 281 (24.0)            | 206 (23.8)  | 75 (24.8)  |         |
| MD-6P                                           | 266 (22.8)            | 203 (23.4)  | 63 (20.9)  |         |
| 6P-MN                                           | 361 (30.9)            | 265 (30.6)  | 96 (31.8)  |         |
| MN-6A                                           | 261 (22.3)            | 193 (22.3)  | 68 (22.5)  |         |
| Mechanism of Trauma                             |                       |             |            | 0.60    |
| Traffic accident                                | 500 (42.8)            | 375 (43.3)  | 125 (41.4) |         |
| Slip down                                       | 325 (27.8)            | 232 (26.8)  | 93 (30.8)  |         |
| Fall down                                       | 171 (14.6)            | 129 (14.9)  | 42 (13.9)  |         |
| Others                                          | 173 (14.8)            | 131 (15.1)  | 42 (13.9)  |         |
| Chief complaint                                 |                       |             |            |         |
| Altered mentality                               | 279 (23.9)            | 223 (25.7)  | 56 (18.5)  | 0.01    |
| Fracture/Abrasion/Laceration                    | 302 (25.8)            | 204 (23.5)  | 98 (32.5)  | <0.01   |
| Chest/Abdominal pain                            | 47 (4.0)              | 31 (3.6)    | 16 (5.3)   | 0.19    |
| Dyspnea                                         | 25 (2.1)              | 20 (2.3)    | 5 (1.7)    | 0.50    |

|                                      |                |                |                |       |
|--------------------------------------|----------------|----------------|----------------|-------|
| Epistaxis                            | 44 (3.8)       | 30 (3.5)       | 14 (4.6)       | 0.36  |
| Headache/Paralysis/Dizziness/Vertigo | 95 (8.1)       | 64 (7.4)       | 31 (10.3)      | 0.11  |
| Nausea/Vomiting                      | 32 (2.7)       | 20 (2.3)       | 12 (4.0)       | 0.13  |
| EMS Vital sign assessment            |                |                |                |       |
| SBP, mmHg                            | 130 (109-150)  | 130 (104-146)  | 131 (115-150)  | <0.01 |
| Missing                              | 65 (5.6)       | 56 (6.5)       | 9 (3.0)        | 0.02  |
| DBP, mmHg                            | 80 (70-91)     | 80 (69-90)     | 80 (70-92)     | <0.01 |
| Missing                              | 75 (6.4)       | 65 (7.5)       | 10 (3.3)       | 0.01  |
| HR, /min                             | 86 (75-99)     | 86 (74-99)     | 86 (76-100)    | <0.01 |
| Missing                              | 31 (2.7)       | 28 (3.2)       | 3 (1.0)        | 0.04  |
| RR, /min                             | 18 (16-20)     | 18 (16-20)     | 18 (16-20)     | <0.01 |
| Missing                              | 36 (3.1)       | 33 (3.8)       | 3 (1.0)        | 0.01  |
| SpO2, %                              | 98 (95-99)     | 98 (95-99)     | 98 (96-99)     | <0.01 |
| Missing                              | 38 (3.3)       | 33 (3.8)       | 5 (1.7)        | 0.07  |
| Temperature, °C                      | 36.5 (36-36.8) | 36.5 (36-36.8) | 36.5 (36-36.7) | <0.01 |
| Missing                              | 94 (8.0)       | 65 (7.5)       | 29 (9.6)       | 0.25  |
| AVPU scale                           |                |                |                | <0.01 |
| Alert                                | 714 (61.1)     | 504 (58.1)     | 210 (69.5)     |       |
| Verbal                               | 168 (14.4)     | 136 (15.7)     | 32 (10.6)      |       |
| Pain                                 | 199 (17.0)     | 158 (18.2)     | 41 (13.6)      |       |
| Unresponsive                         | 88 (7.5)       | 69 (8.0)       | 19 (6.3)       |       |
| Abnormal light reflex                | 165 (14.1)     | 132 (15.2)     | 33 (10.9)      | <0.01 |
| Missing                              | 66 (5.6)       | 57 (6.6)       | 9 (3.0)        |       |
| GCS scale component                  |                |                |                |       |
| Glasgow coma scale eye               |                |                |                | <0.01 |
| 4                                    | 558 (47.7)     | 380 (43.8)     | 178 (58.9)     |       |
| 3                                    | 128 (10.9)     | 109 (12.6)     | 19 (6.3)       |       |
| 2                                    | 110 (9.4)      | 82 (9.5)       | 28 (9.3)       |       |
| 1                                    | 174 (14.9)     | 141 (16.3)     | 33 (10.9)      |       |
| Unknown                              | 199 (17.0)     | 155 (17.9)     | 44 (14.6)      |       |
| Glasgow coma scale Verbal            |                |                |                | 0.01  |
| 5                                    | 520 (44.5)     | 359 (41.4)     | 161 (53.3)     |       |
| 4                                    | 118 (10.1)     | 88 (10.1)      | 30 (9.9)       |       |
| 3                                    | 25 (2.1)       | 19 (2.2)       | 6 (2.0)        |       |
| 2                                    | 132 (11.3)     | 105 (12.1)     | 27 (8.9)       |       |
| 1                                    | 174 (14.9)     | 141 (16.3)     | 33 (10.9)      |       |
| Unknown                              | 200 (17.1)     | 155 (17.9)     | 45 (14.9)      |       |
| Glasgow coma scale Motor             |                |                |                | <0.01 |
| 6                                    | 499 (42.7)     | 333 (38.4)     | 166 (55.0)     |       |
| 5                                    | 124 (10.6)     | 103 (11.9)     | 21 (7.0)       |       |
| 4                                    | 158 (13.5)     | 123 (14.2)     | 35 (11.6)      |       |
| 3                                    | 47 (4.0)       | 39 (4.5)       | 8 (2.6)        |       |
| 2                                    | 17 (1.5)       | 15 (1.7)       | 2 (0.7)        |       |
| 1                                    | 125 (10.7)     | 99 (11.4)      | 26 (8.6)       |       |
| Unknown                              | 199 (17.0)     | 155 (17.9)     | 44 (14.6)      |       |

|                                                                                         |            |            |            |       |
|-----------------------------------------------------------------------------------------|------------|------------|------------|-------|
| EMS management                                                                          |            |            |            |       |
| Intravenous route                                                                       | 176 (15.1) | 129 (14.9) | 47 (15.6)  | 0.77  |
| Hemorrhage control                                                                      | 586 (50.1) | 426 (49.1) | 160 (53.0) | 0.25  |
| Spinal motion restriction                                                               | 811 (69.4) | 606 (69.9) | 205 (67.9) | 0.51  |
| Advanced airway management                                                              | 4 (0.3)    | 2 (0.2)    | 2 (0.7)    | 0.28  |
| Oxygen supply                                                                           | 233 (19.9) | 176 (20.3) | 57 (18.9)  | 0.59  |
| Field triage decision scheme criteria*                                                  |            |            |            |       |
| Physiological criteria                                                                  |            |            |            |       |
| SBP<90 mmHg                                                                             | 58 (5.0)   | 42 (4.8)   | 16 (5.3)   | 0.75  |
| RR<10 or >29 /min                                                                       | 11 (0.9)   | 11 (1.3)   | 0 (0.0)    | 0.08  |
| Non-Alert                                                                               | 429 (36.7) | 343 (39.6) | 86 (28.5)  | <0.01 |
| Anatomic criteria                                                                       |            |            |            |       |
| All penetrating injuries to head, neck, torso and extremities proximal to elbow or knee | 34 (2.9)   | 23 (2.7)   | 11 (3.6)   | 0.38  |
| Chest wall instability or deformity                                                     | 4 (0.3)    | 4 (0.5)    | 0 (0.0)    | 0.58  |
| Two or more proximal long bone fractures                                                | 19 (1.6)   | 13 (1.5)   | 6 (2.0)    | 0.60  |
| Crush, degloved, mangled or pulseless extremity                                         | 15 (1.3)   | 13 (1.5)   | 2 (0.7)    | 0.38  |
| Amputation proximal to wrist or ankle                                                   | 9 (0.8)    | 9 (1.0)    | 0 (0.0)    | 0.12  |
| Pelvic fractures                                                                        | 8 (0.7)    | 6 (0.7)    | 2 (0.7)    | >0.95 |
| Open or depressed skull fracture                                                        | 17 (1.5)   | 9 (1.0)    | 8 (2.6)    | 0.05  |
| Paralysis                                                                               | 21 (1.8)   | 11 (1.3)   | 10 (3.3)   | 0.02  |
| Mechanism of injury criteria                                                            |            |            |            |       |
| Fall > 6 meter                                                                          | 113 (9.7)  | 84 (9.7)   | 29 (9.6)   | >0.95 |
| High-risk auto crash                                                                    | 96 (8.2)   | 73 (8.4)   | 23 (7.6)   | 0.66  |
| Auto vs pedestrian/bicyclist thrown, run over, or with significant (>30km/h) impact     | 119 (10.2) | 83 (9.6)   | 36 (11.9)  | 0.25  |
| Motorcycle crash > 30 km/hour                                                           | 105 (9.0)  | 70 (8.1)   | 35 (11.6)  | 0.07  |
| ED disposition                                                                          |            |            |            |       |
| Discharge                                                                               | 320 (27.4) | 241 (27.8) | 79 (26.2)  |       |
| Transfer                                                                                | 444 (38.0) | 316 (36.4) | 128 (42.4) |       |
| Admitted                                                                                | 366 (31.3) | 276 (31.8) | 90 (29.8)  |       |
| In-hospital mortality                                                                   | 90 (7.7)   | 74 (8.5)   | 16 (5.3)   | 0.07  |
| Outcomes                                                                                |            |            |            |       |
| TBI                                                                                     | 281 (24.0) | 215 (24.8) | 66 (21.9)  | 0.30  |
| TBI with intracranial injury                                                            | 251 (21.5) | 195 (22.5) | 56 (18.5)  | 0.15  |
| TBI-related non-discharge                                                               | 249 (21.3) | 192 (22.1) | 57 (18.9)  | 0.23  |
| TBI-related death                                                                       | 43 (3.7)   | 32 (3.7)   | 11 (3.6)   | >0.95 |

\*EMS providers check specific criteria orderly from physiologic, anatomical, and mechanism of injury. If the preceding criteria are satisfied, the information of the latter criteria is not collected.

IQR, interquartile range; SBP, systolic blood pressure; RR, respiratory rate; ED, emergency department; TBI, traumatic brain injury.

Supplementary Table 3. Hyperparameters of the final prediction models\*

| Model                     | Outcome | Hyperparameters                                                                                                                           |
|---------------------------|---------|-------------------------------------------------------------------------------------------------------------------------------------------|
| Elastic net               | TBI     | alpha: 0.325, lambda: 0.07506346                                                                                                          |
|                           | TBI-I   | alpha: 0.325, lambda: 0.07506346                                                                                                          |
|                           | TBI-ND  | alpha: 0.325, lambda: 0.07017153                                                                                                          |
|                           | TBI-D   | alpha: 0.325, lambda: 0.01565599                                                                                                          |
| Random forest             | TBI     | ntree:500, mtry: 18                                                                                                                       |
|                           | TBI-I   | ntree:500, mtry: 18                                                                                                                       |
|                           | TBI-ND  | ntree:500, mtry: 18                                                                                                                       |
|                           | TBI-D   | ntree:500, mtry: 15                                                                                                                       |
| Support vector machine    | TBI     | sigma: 0.008047; C: 4                                                                                                                     |
|                           | TBI-I   | sigma: 0.008047; C: 4                                                                                                                     |
|                           | TBI-ND  | sigma: 0.008047; C: 4                                                                                                                     |
|                           | TBI-D   | sigma: 0.008047; C: 4                                                                                                                     |
| Extreme gradient boosting | TBI     | nrounds: 299; max_depth: 1; eta: 0.4807096; gamma: 2.336623;<br>colsample_bytree: 0.3657893; min_child_weight: 8; subsample:<br>0.8182623 |
|                           | TBI-I   | nrounds: 299; max_depth: 1; eta: 0.4807096; gamma: 2.336623;<br>colsample_bytree: 0.3657893; min_child_weight: 8; subsample:<br>0.8182623 |
|                           | TBI-ND  | nrounds: 301; max_depth: 1; eta: 0.02154674; gamma: 4.696105;<br>colsample_bytree: 0.590754; min_child_weight: 1; subsample:<br>0.5070866 |
|                           | TBI-D   | nrounds: 50; max_depth: 0.3; eta: 0.3; gamma: 0;<br>colsample_bytree: 0.8; min_child_weight: 1; subsample:<br>0.5510204                   |

\*Aside from the hyperparameters mentioned, all other hyperparameters are used as the default value.

TBI, traumatic brain injury; TBI-I, TBI with intracranial hemorrhage or injury; TBI-ND, TBI non-discharge; TBI-D, TBI with death.



Supplementary Figure 1. Receiver operating characteristics of prediction models according to outcomes. TBI, traumatic brain injury; TBI-I, TBI with intracranial hemorrhage or injury; TBI-ND, TBI non-discharge; TBI-D, TBI with death.

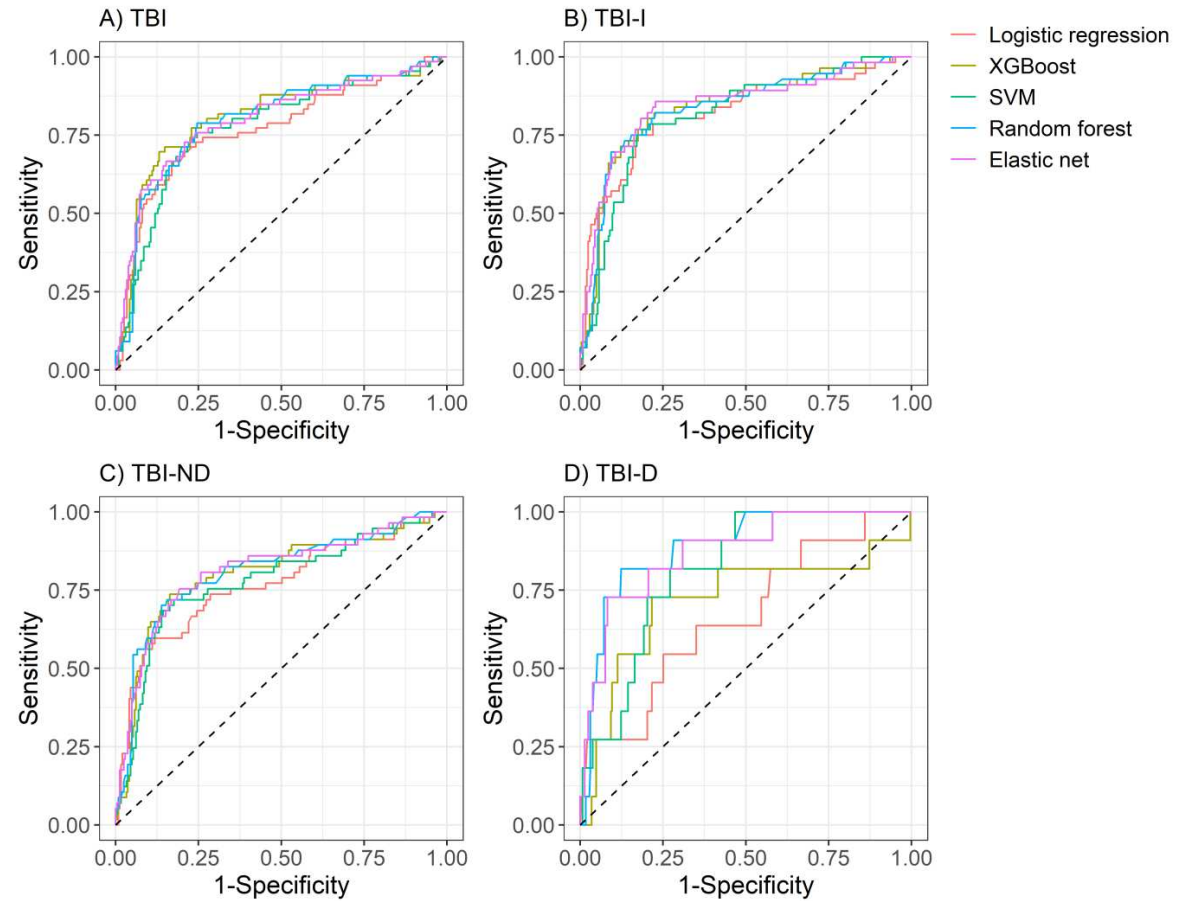

Supplementary Figure 2. Precision-recall curve of prediction models according to outcomes. TBI, traumatic brain injury; TBI-I, TBI with intracranial hemorrhage or injury; TBI-ND, TBI non-discharge; TBI-D, TBI with death; LR, logistic regression analysis; XGB, extreme gradient boosting; RF, random forest, EN, elastic net.

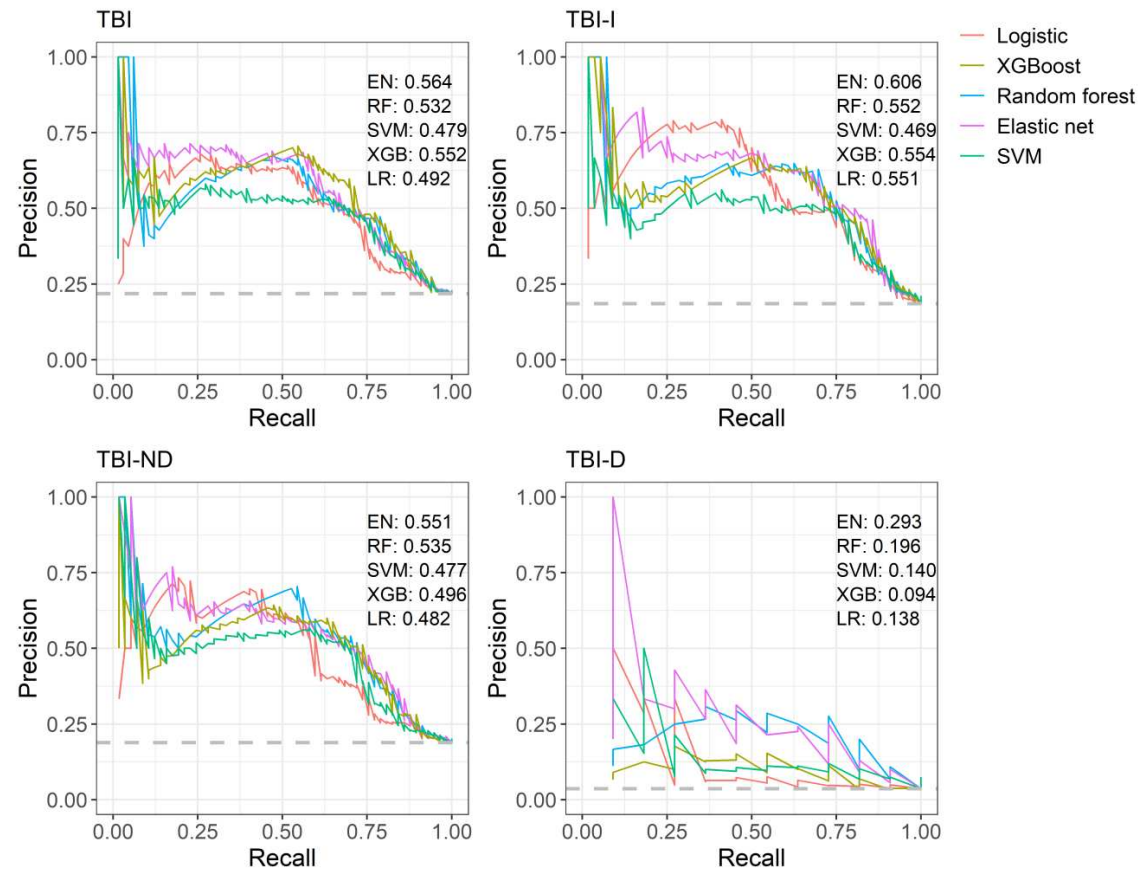

Supplementary Figure 3. Calibration plot of prediction models according to outcomes. TBI, traumatic brain injury; TBI-I, TBI with intracranial hemorrhage or injury; TBI-ND, TBI non-discharge; TBI-D, TBI with death; p, p-value of Hosmer-Lemeshow test; BS, scaled Brier score.

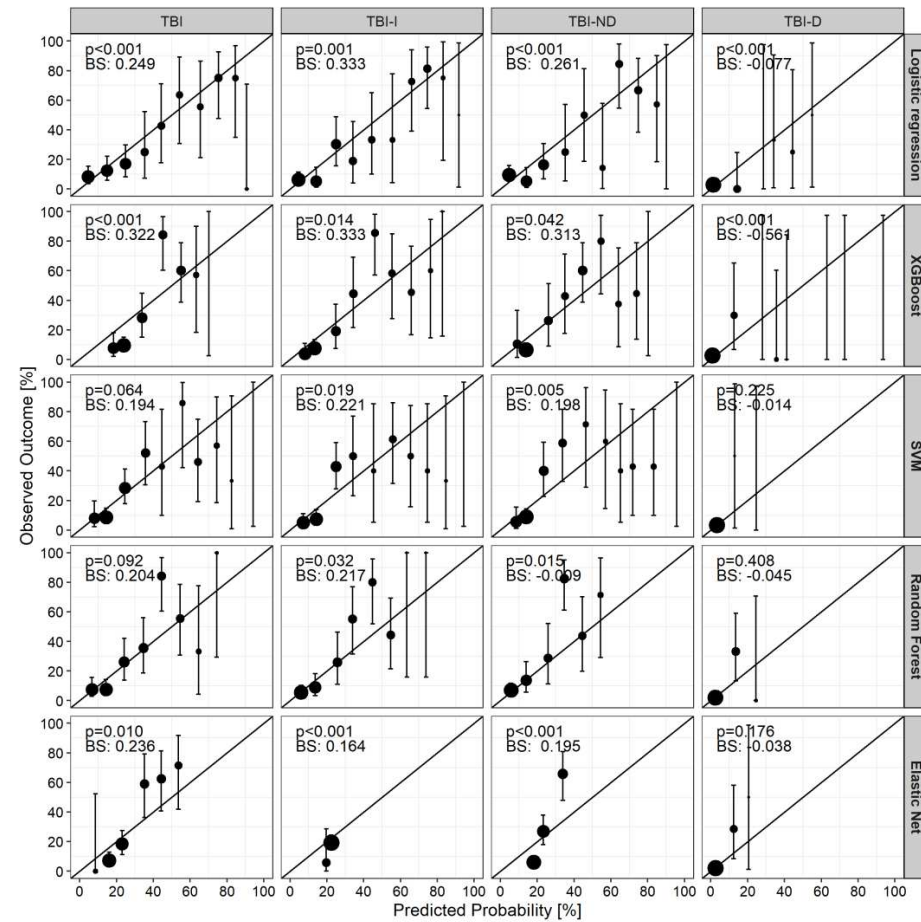



Supplementary Table 4. Example of calculating false-positive patients for accurately identified patients. TBI, traumatic brain injury; EN, elastic net.

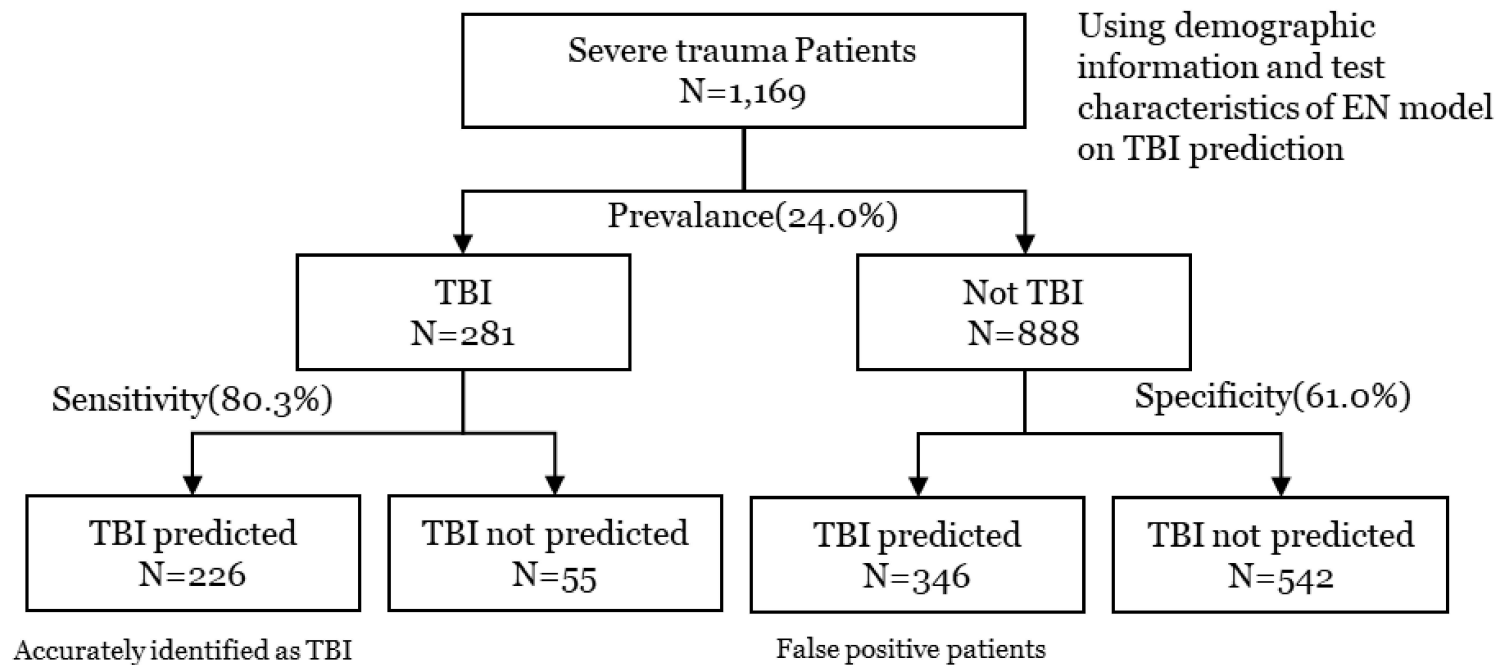

False-positive patients for every 10 patients that are accurately identified as TBI :  
 $346/226 \times 10 = 15.3$ , rounded up to 16 patients
